# Supplementary material for: Accessing indole–isoindole derivatives via palladium-catalyzed [3+2] cyclization of isocyanides with alkynyl imines
Source: Royal Society of Chemistry journal article supplement (doi:10.1039/d3cc02654j), 2023-01-01

## Supporting Information

For

# Accessing indole-isoindole derivatives via palladium-catalyzed [3+2] cyclization of isocyanides with alkynyl imines

Dianpeng Chen,\* Jianming Li, Gongle Liu, Xiuhua Zhang, Xin Wang, Yongwei Liu, Xuan Liu,

Xinghai Liu, Yongqin Li and Yingying Shan\*

E-mail: chendp@zju.edu.cn; shanyying@zju.edu.cn.

---

### Table of Contents

|                                                                      |            |
|----------------------------------------------------------------------|------------|
| <b>General information</b>                                           | <b>P2</b>  |
| <b>General procedure for synthesis of substrates</b>                 | <b>P3</b>  |
| <b>Optimization of reaction conditions</b>                           | <b>P5</b>  |
| <b>General procedure for the reaction</b>                            | <b>P6</b>  |
| <b>Mechanistic studies</b>                                           | <b>P7</b>  |
| <b>The single crystal data of 3a</b>                                 | <b>P10</b> |
| <b>The photophysical properties of 3bf</b>                           | <b>P11</b> |
| <b>The spectroscopic data of compounds</b>                           | <b>P13</b> |
| <b>The <sup>1</sup>H and <sup>13</sup>C NMR spectra of compounds</b> | <b>P51</b> |

## 1. General information

All reactions were carried out in oven-dried glassware sealed with rubber septa under nitrogen condition. All solvents were distilled under nitrogen atmosphere prior to use. Purification of products was conducted by flash chromatography on silica gel (200-300 mesh). NMR spectra were measured on a Bruker magnetic resonance spectrometer ( $^1\text{H}$  at 500 MHz,  $^{13}\text{C}$  at 126 MHz). Chemical shifts are reported in ppm using tetramethylsilane as internal standard (s = singlet, d = doublet, t = triplet, q = quartet, dd = doublet of doublets, m = multiplet). HRMS data were obtained on a VG ZAB-HS mass spectrometer, Bruker Apex IV FTMS spectrometer. Absorption spectra were obtained on a HITACHI U-2910 spectrometer. Fluorescence spectra were collected on a Horiba Jobin Yvon-Edison Fluoromax-4 fluorescence spectrometer. X-Ray single-crystal diffraction data were collected on an Agilent Technologies Gemini single-crystal diffractometer. Compounds described in the literature were characterized by the comparison of  $^1\text{H}$  and/or  $^{13}\text{C}$  NMR spectra to the previously reported data.

## 2. General procedure for substrates

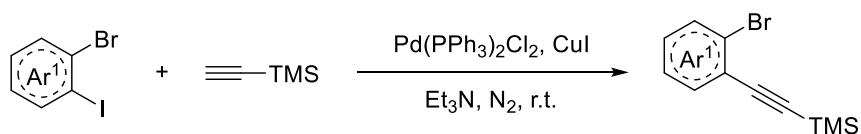

Under nitrogen condition, Pd(PPh<sub>3</sub>)<sub>2</sub>Cl<sub>2</sub> (5 mol %) and CuI (10 mol %) was successively added to a 50 mL vial equipped with a stir bar. A solution of *o*-bromoiodobenzene (10 mmol) and trimethylsilylacetylene (12 mmol) in Et<sub>3</sub>N (20 mL) was added using a syringe. Then, the reaction was stirred 12 hours at room temperature. Solvent was removed in vacuo to leave a crude mixture, which was purified by silica gel column chromatography to afford the pure product.

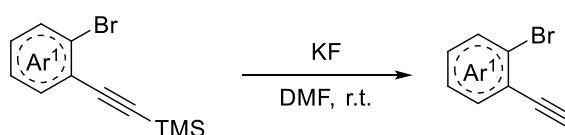

KF (20 mmol) was added to a solution of above substrate (10 mmol) in DMF (10 mL) at room temperature. The resulting mixture was stirred for 30 minutes at room temperature. The reaction was monitored by TLC, and then quenched by adding 20 mL water and extracted with ether (3 × 20 mL). The combined organics were dried over anhydrous Na<sub>2</sub>SO<sub>4</sub>. Solvent was removed in vacuo to leave a crude mixture, which was purified by silica gel column chromatography to afford the pure product.

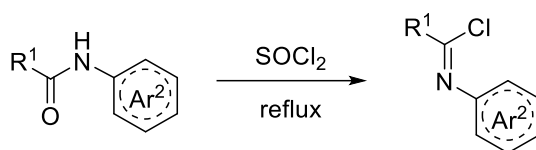

Under nitrogen condition, the amide (10.0 mmol) was added to SOCl<sub>2</sub> (6 mL, 82.5 mmol) at room temperature. Then, the resulting solution was heated to reflux for 2 hours. Corresponding imidoyl chloride was obtained by the removal of excessive SOCl<sub>2</sub>, and the crude product could be directly used in the next step.

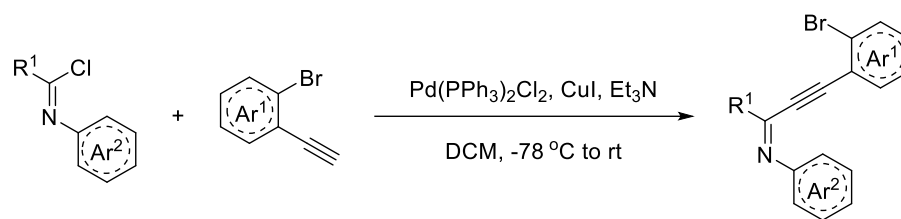

Under nitrogen condition,  $Pd(PPh_3)_2Cl_2$  (5 mol %) and  $CuI$  (10 mol %) were successively added to a 50 mL vial equipped with a stir bar at  $-78\text{ }^\circ C$ . A solution of the imidoyl chloride (10 mmol) in  $DCM$  (10 mL) was added using a syringe. Then, the corresponding alkyne (12 mmol) in  $DCM$  (10 mL) was added to the mixture.  $Et_3N$  (20 mmol) was added at last. The reaction was stirred for 30 minutes at  $-78\text{ }^\circ C$ , and stirred for another 4 hours at room temperature. Solvent was removed in vacuo to leave a crude mixture, which was purified by silica gel column chromatography to afford the pure product.

### 3. Optimization of reaction conditions

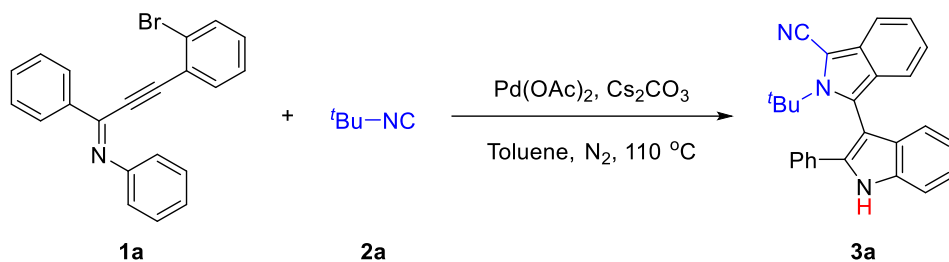

| Entry     | Deviation from standard conditions <sup>a</sup>                   | Yield of <b>3a</b> (%) <sup>b</sup> |
|-----------|-------------------------------------------------------------------|-------------------------------------|
| 1         | None                                                              | 83                                  |
| 2         | Without $\text{Pd}(\text{OAc})_2$                                 | 0                                   |
| 3         | Without $\text{Cs}_2\text{CO}_3$                                  | Trace                               |
| 4         | $\text{PdCl}_2$ instead of $\text{Pd}(\text{OAc})_2$              | 66                                  |
| 5         | $\text{Pd}(\text{PPh}_3)_4$ instead of $\text{Pd}(\text{OAc})_2$  | 59                                  |
| 6         | $\text{Na}_2\text{CO}_3$ instead of $\text{Cs}_2\text{CO}_3$      | 68                                  |
| 7         | $\text{Et}_3\text{N}$ or DBU instead of $\text{Cs}_2\text{CO}_3$  | Trace                               |
| 8         | Xantphos was added                                                | 72                                  |
| 9         | IPr was added                                                     | 68                                  |
| 10        | 1,10-Phen was added                                               | 57                                  |
| 11        | Acetonitrile instead of Toluene                                   | 34                                  |
| 12        | DMF instead of Toluene                                            | Complex                             |
| <b>13</b> | <b>5 mol% of <math>\text{Pd}(\text{OAc})_2</math></b>             | <b>82</b>                           |
| 14        | 2 mol% of $\text{Pd}(\text{OAc})_2$                               | 55                                  |
| 15        | $90\text{ }^\circ\text{C}$ instead of $110\text{ }^\circ\text{C}$ | 41                                  |

<sup>a</sup> Conditions: **1a** (0.2 mmol), **2a** (0.5 mmol),  $\text{Pd}(\text{OAc})_2$  (10 mol%),  $\text{Cs}_2\text{CO}_3$  (2.0 equiv) in 2 mL of toluene were stirred at  $110\text{ }^\circ\text{C}$  under a nitrogen atmosphere for 12 h; <sup>b</sup> Isolated yield based on **1a**.

#### 4. General procedure for the reaction

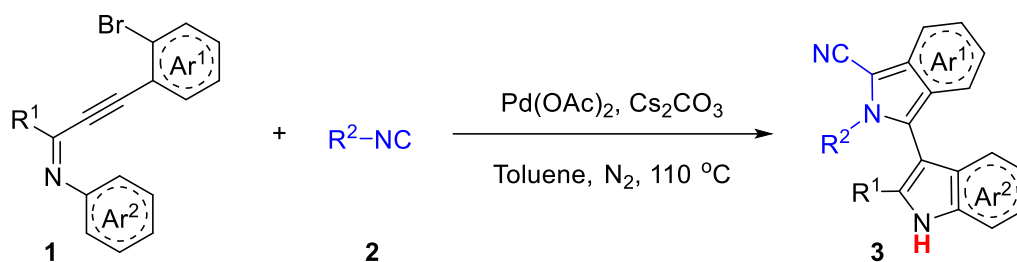

A solution of alkynyl imide **1** (0.2 mmol), isocyanide **2** (0.5 mmol),  $\text{Pd}(\text{OAc})_2$  (5 mol %) and  $\text{Cs}_2\text{CO}_3$  (2 equiv) in toluene (2.0 mL) was stirred at  $110\text{ }^\circ\text{C}$  for 12 hours. After completion of the reaction as indicated by TLC, removal of the volatiles and purification by flash column chromatography provided the product **3**.

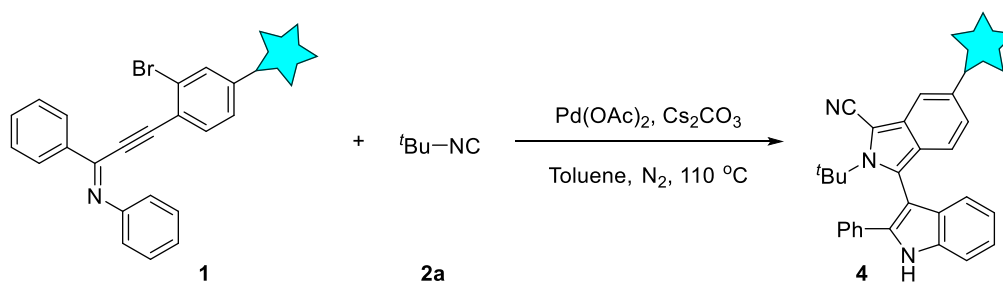

A solution of substrate **1** (0.2 mmol), *tert*-butylisocyanide **2a** (0.5 mmol),  $\text{Pd}(\text{OAc})_2$  (5 mol %) and  $\text{Cs}_2\text{CO}_3$  (2 equiv) in toluene (2.0 mL) was stirred at  $110\text{ }^\circ\text{C}$  for 12 hours. After completion of the reaction as indicated by TLC, removal of the volatiles and purification by flash column chromatography provided the product **4**.

## 5. Mechanistic Studies

(a) The deuterium labeling study

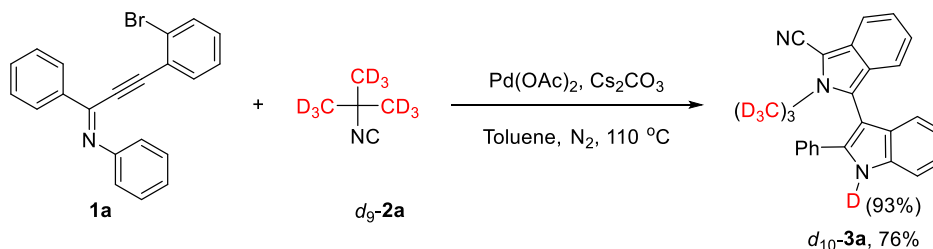

A solution of alkynyl imide **1a** (0.2 mmol), isocyanide  $d_9$ -**2a** (0.5 mmol),  $\text{Pd}(\text{OAc})_2$  (5 mol %) and  $\text{Cs}_2\text{CO}_3$  (2 equiv) in dry Toluene (2.0 mL) was stirred at  $110^\circ\text{C}$  for 12 hours. After completion of the reaction as indicated by TLC, removal of the volatiles and purification by flash column chromatography provided the corresponding product  $d_{10}$ -**3a** in 76% yield.

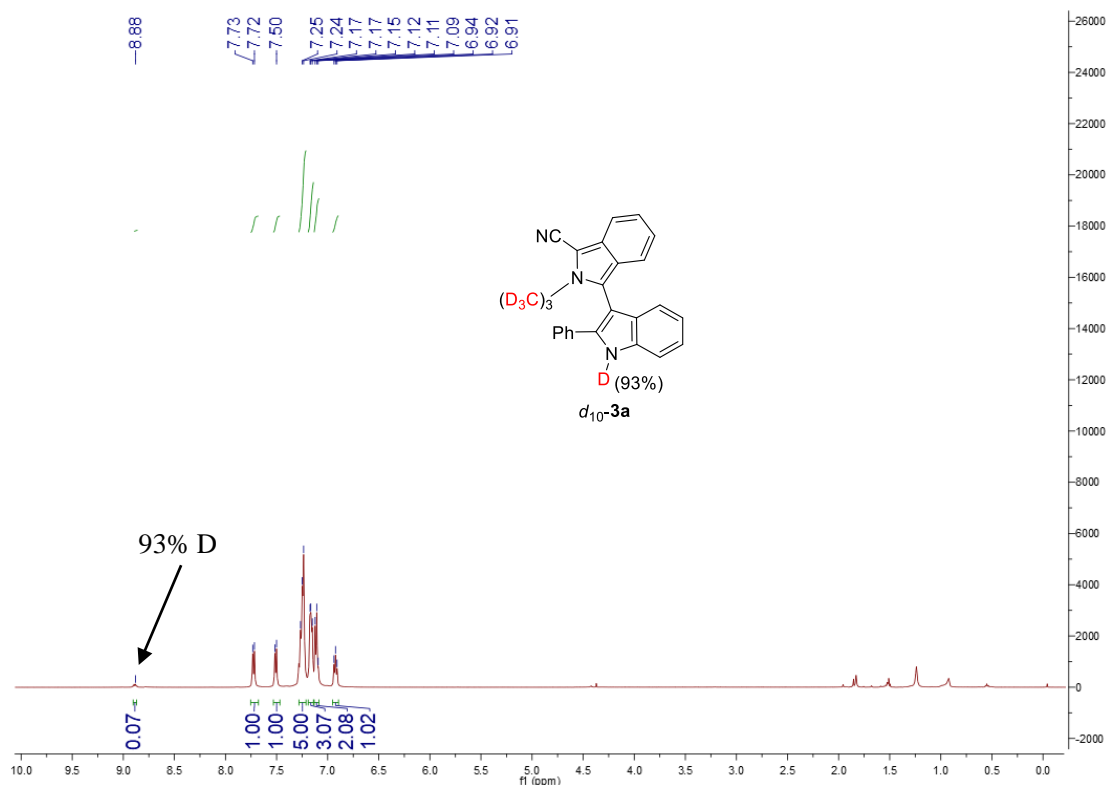

(b) The competition KIE experiment

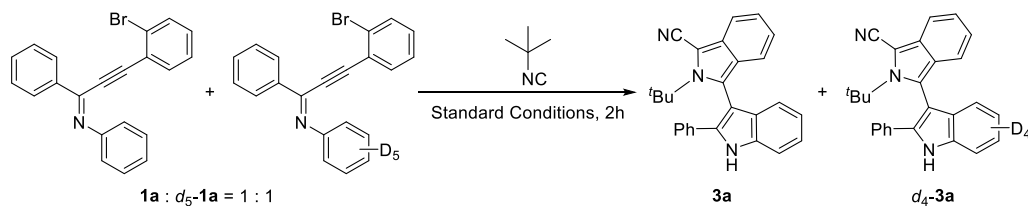

A solution of substrate **1** (36mg of **1a** and 36mg of  $d_5$ -**1a**), *tert*-butylisocyanide **2a** (0.6 mmol), Pd(OAc)<sub>2</sub> (5 mol %) and Cs<sub>2</sub>CO<sub>3</sub> (2 equiv) in toluene (2.0 mL) was stirred at 110 °C for 2 hours. After evaporation, chromatography on silica gel (eluent: hexane/EtOAc = 5:1) of the crude mixture afforded 12 mg of the product mixture as light yellow solid. The KIE value ( $K_H/K_D = 2.23$ ) was determined from the <sup>1</sup>H NMR.

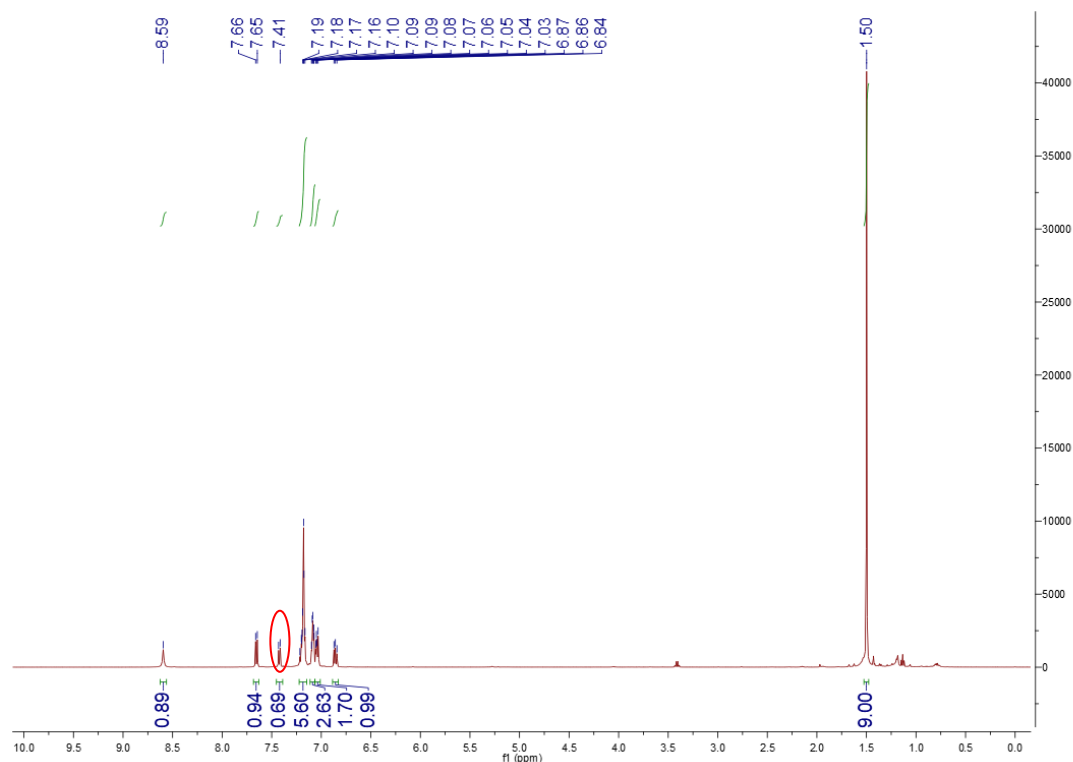

(c) The parallel KIE experiment

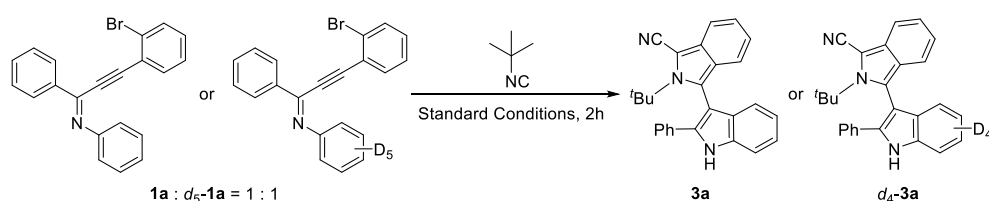

A solution of substrate **1a** (0.2 mmol), *tert*-butylisocyanide **2a** (0.6 mmol), Pd(OAc)<sub>2</sub> (5 mol %) and Cs<sub>2</sub>CO<sub>3</sub> (2 equiv) in toluene (2.0 mL) was stirred at 110 °C for 2 hours. After evaporation, chromatography on silica gel (eluent: hexane/EtOAc =



5:1) of the crude mixture afforded the desired product **3a** in 27.63% yield (21.5mg).

A solution of substrate *d*<sub>5</sub>-**1a** (0.2 mmol), *tert*-butylisocyanide **2a** (0.6 mmol), Pd(OAc)<sub>2</sub> (5 mol %) and Cs<sub>2</sub>CO<sub>3</sub> (2 equiv) in toluene (2.0 mL) was stirred at 110 °C for 2 hours. After evaporation, chromatography on silica gel (eluent: hexane/EtOAc = 5:1) of the crude mixture afforded the desired product *d*<sub>4</sub>-**3a** in 11.23% yield (8.8 mg).

Consequently, the parallel kinetic isotopic effect value equals 2.46. (KIE = 27.63%/11.23%)

## 6. The single crystal data of 3a

The crystal of **3a** was obtained by crystallization from a solution in methanol after purification by column chromatography. The crystallographic data was deposited with the Cambridge Crystallographic Data Centres supplementary publication with a CCDC number: **2264478**.

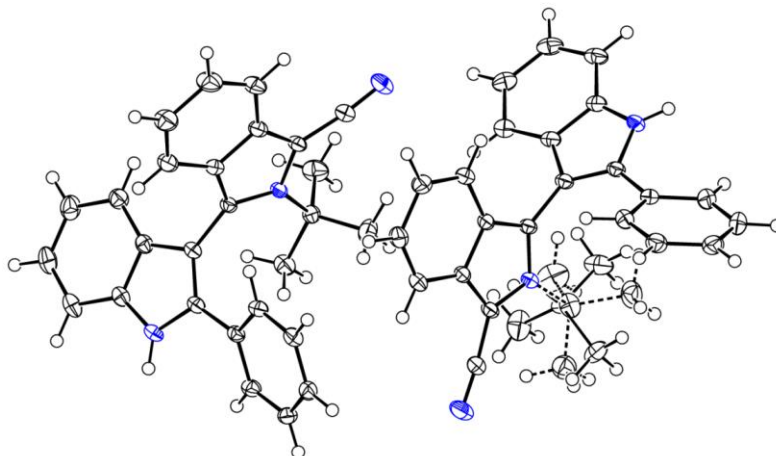

Bond precision: C-C = 0.0018 Å      Wavelength=0.71073

Cell:            a=10.9750(7)      b=12.9016(8)      c=15.8408(11)  
                  alpha=74.345(2)    beta=81.891(2)    gamma=89.567(2)

Temperature:    120 K

|                        | Calculated   | Reported     |
|------------------------|--------------|--------------|
| Volume                 | 2137.1(2)    | 2137.1(2)    |
| Space group            | P -1         | P -1         |
| Hall group             | -P 1         | -P 1         |
| Moiety formula         | C27 H23 N3   | C27 H23 N3   |
| Sum formula            | C27 H23 N3   | C27 H23 N3   |
| Mr                     | 389.48       | 389.48       |
| Dx, g cm <sup>-3</sup> | 1.211        | 1.211        |
| Z                      | 4            | 4            |
| Mu (mm <sup>-1</sup> ) | 0.072        | 0.072        |
| F000                   | 824.0        | 824.0        |
| F000'                  | 824.27       |              |
| h, k, lmax             | 14, 16, 20   | 14, 16, 20   |
| Nref                   | 9905         | 9892         |
| Tmin, Tmax             | 0.983, 0.989 | 0.598, 0.746 |
| Tmin'                  | 0.972        |              |

Correction method= # Reported T Limits: Tmin=0.598 Tmax=0.746  
AbsCorr = MULTI-SCAN

Data completeness= 0.999      Theta(max)= 27.587

R(reflections)= 0.0445( 8531)      wR2(reflections)= 0.1116( 9892)

S = 1.036      Npar= 587

## 7. The Photophysical Properties of **3bf**

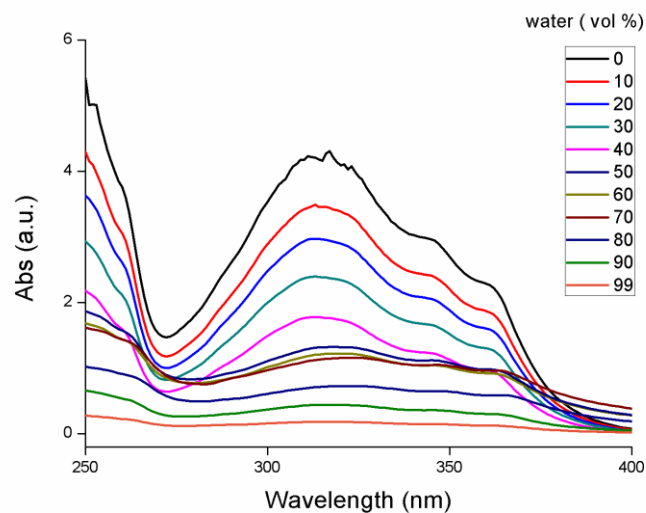

**Figure S1** Absorption spectra of **3bf** in THF/water mixtures. Excited width = 5.0 nm, emission width = 5.0 nm.

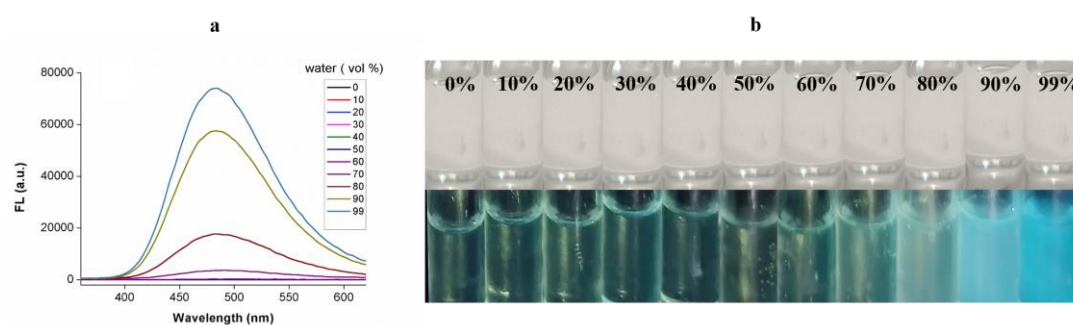

**Figure S2** (a) Emission spectra of **3bf** in THF/water mixtures. (b) Solution color of **3bf** under UV light (365 nm).

Excited width = 5.0 nm, emission width = 5.0 nm.

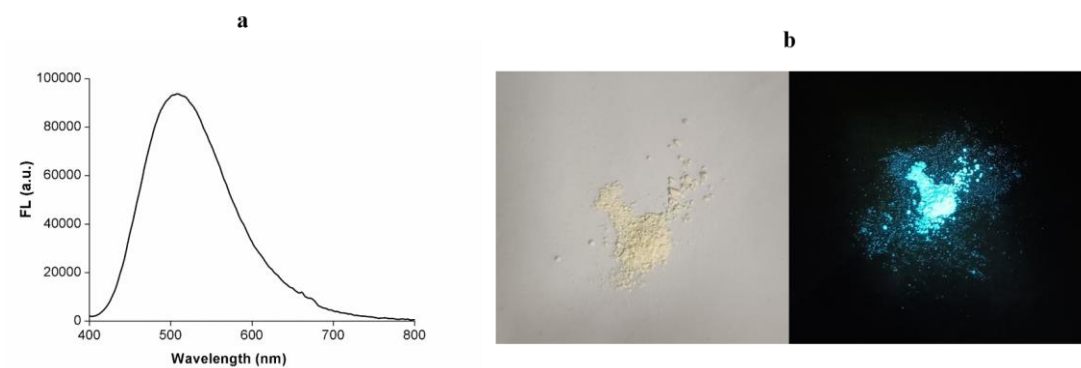

**Figure S3** (a) Solid emission spectra of **3bf**. (b) Images of compound **3bf** under white light (left) and under UV light (365 nm) (right)

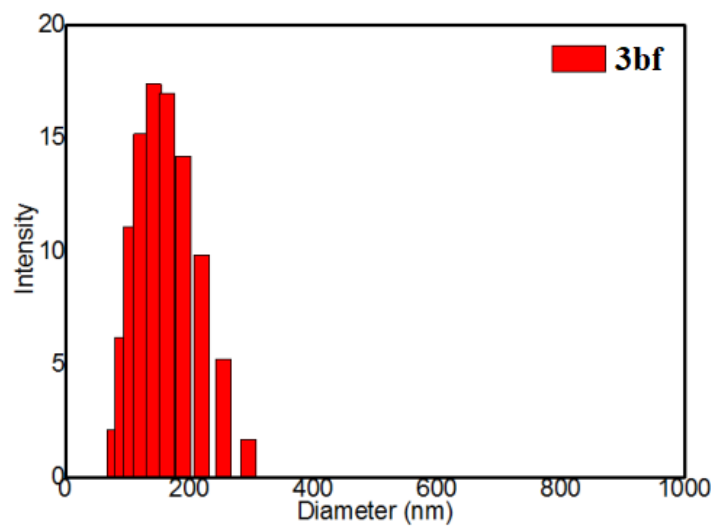

**Figure S4** The size distribution of nano-particles of **3bf** in H<sub>2</sub>O-THF (90:10, v/v)

## 8. Characterization data

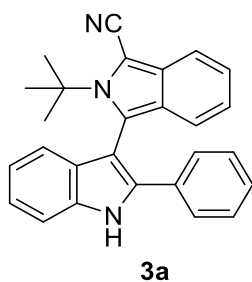

### 2-(*tert*-butyl)-3-(2-phenyl-1*H*-indol-3-yl)-2*H*-isoindole-1-carbonitrile (**3a**)

Following the General Procedure, and target product was purified by flash chromatography (PE/EA = 5/1) to give **3a** 81 mg (83% yield) as a pale yellow solid;

$^1\text{H}$  NMR (500 MHz,  $\text{CDCl}_3$ )  $\delta$  8.88 (br, 1H), 7.73 (d,  $J = 9.0$  Hz, 1H), 7.51 (d,  $J = 8.0$  Hz, 1H), 7.28 (s, 1H), 7.24 (d,  $J = 7.0$  Hz, 4H), 7.18–7.14 (m, 3H), 7.12 (d,  $J = 8.0$  Hz, 2H), 6.92 (t,  $J = 8.0$  Hz, 1H), 1.57 (s, 9H);

$^{13}\text{C}$  NMR (126 MHz,  $\text{CDCl}_3$ )  $\delta$  136.7, 135.5, 133.4, 131.7, 131.0, 129.2, 128.3, 126.2, 125.9, 124.9, 123.3, 122.4, 121.3, 121.1, 119.6, 117.5, 117.5, 111.2, 106.0, 92.8, 62.8, 31.4;

HRMS (EI-TOF) calcd for  $\text{C}_{27}\text{H}_{23}\text{N}_3$  389.1892, found 389.1890.

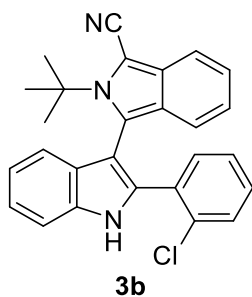

### 2-(*tert*-butyl)-3-(2-(2-chlorophenyl)-1*H*-indol-3-yl)-2*H*-isoindole-1-carbonitrile (**3b**)

Following the General Procedure, and target product was purified by flash chromatography (PE/EA = 5/1) to give **3b** 66 mg (62% yield) as a pale yellow solid;

$^1\text{H}$  NMR (500 MHz,  $\text{CDCl}_3$ )  $\delta$  8.95 (br, 1H), 7.72 (d,  $J = 9.0$  Hz, 1H), 7.55 (d,  $J$

= 8.0 Hz, 1H), 7.49 (d,  $J = 8.0$  Hz, 1H), 7.36–7.33 (m, 1H), 7.29 (d,  $J = 2.0$  Hz, 1H), 7.27 (d,  $J = 7.0$  Hz, 1H), 7.24–7.21 (m, 1H), 7.19–7.16 (m, 2H), 7.01–6.97 (m, 2H), 6.86 (dd,  $J = 8.0, 2.0$  Hz, 1H), 1.59 (s, 9H);

$^{13}\text{C}$  NMR (126 MHz,  $\text{CDCl}_3$ )  $\delta$  157.0, 140.8, 139.9, 136.3, 135.6, 133.4, 131.1, 130.4, 128.9, 127.7, 126.8, 126.5, 126.0, 124.9, 123.3, 122.5, 121.3, 121.2, 119.6, 117.5, 111.2, 106.1, 92.9, 62.9, 31.4;

HRMS (EI-TOF) calcd for  $\text{C}_{27}\text{H}_{22}\text{ClN}_3$  423.1502, found 423.1505.

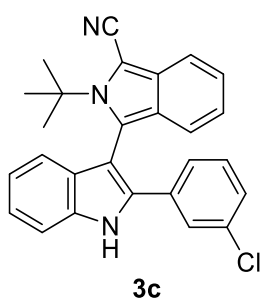

**2-(*tert*-butyl)-3-(2-(3-chlorophenyl)-1*H*-indol-3-yl)-2*H*-isoindole-1-carbonitrile (3c)**

Following the General Procedure, and target product was purified by flash chromatography (PE/EA = 5/1) to give **3c** 70 mg (69% yield) as a pale yellow solid;

$^1\text{H}$  NMR (500 MHz,  $\text{CDCl}_3$ )  $\delta$  8.94 (br, 1H), 7.77 (d,  $J = 9.0$  Hz, 1H), 7.55 (d,  $J = 8.0$  Hz, 1H), 7.36 (t,  $J = 2.0$  Hz, 1H), 7.35–7.31 (m, 1H), 7.31–7.27 (m, 1H), 7.24 (dd,  $J = 8.0, 2.0$  Hz, 1H), 7.20 (d,  $J = 8.0$  Hz, 1H), 7.16 (m, 2H), 7.10 (d,  $J = 8.5$  Hz, 1H), 6.98–6.92 (m, 2H), 1.65 (s, 9H);

$^{13}\text{C}$  NMR (126 MHz,  $\text{CDCl}_3$ )  $\delta$  135.7, 135.1, 135.0, 133.4, 130.9, 130.5, 128.2, 126.2, 126.0, 124.4, 124.3, 123.8, 122.7, 121.4, 121.0, 119.8, 117.6, 117.4, 111.4, 106.9, 93.0, 62.9, 31.4;

HRMS (EI-TOF) calcd for  $\text{C}_{27}\text{H}_{22}\text{ClN}_3$  423.1502, found 423.1505.

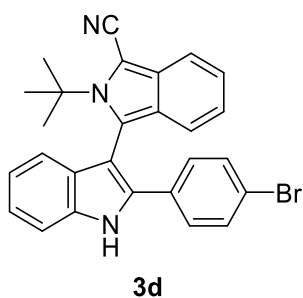

**3-(2-(4-bromophenyl)-1H-indol-3-yl)-2-(tert-butyl)-2H-isoindole-1-carbonitrile (3d)**

Following the General Procedure, and target product was purified by flash chromatography (PE/EA = 5/1) to give **3d** 50 mg (85% yield) as a pale yellow solid;

$^1\text{H}$  NMR (500 MHz,  $\text{CDCl}_3$ )  $\delta$  8.76 (br, 1H), 7.75 (d,  $J = 9.0$  Hz, 1H), 7.52 (d,  $J = 8.0$  Hz, 1H), 7.44–7.40 (m, 2H), 7.31 (m, 2H), 7.19–7.14 (m, 2H), 7.10 (d,  $J = 8.0$  Hz, 1H), 7.06 (d,  $J = 9.0$  Hz, 2H), 6.96 (dd,  $J = 9.0, 6.0$  Hz, 1H), 1.62 (s, 9H);

$^{13}\text{C}$  NMR (126 MHz,  $\text{CDCl}_3$ )  $\delta$  135.6, 135.4, 133.3, 132.4, 131.0, 130.6, 127.6, 126.2, 126.0, 124.7, 123.6, 122.6, 122.4, 121.4, 121.0, 119.8, 117.6, 117.2, 111.2, 106.6, 93.1, 62.9, 31.4;

HRMS (EI-TOF) calcd for  $\text{C}_{27}\text{H}_{22}\text{BrN}_3$  467.0997, found 467.0999.

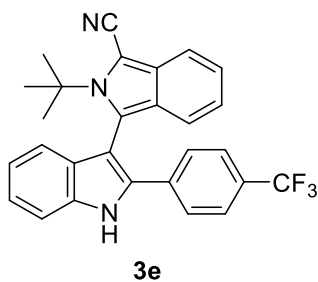

**2-(tert-butyl)-3-(2-(4-(trifluoromethyl)phenyl)-1H-indol-3-yl)-2H-isoindole-1-carbonitrile (3e)**

Following the General Procedure, and target product was purified by flash chromatography (PE/EA = 5/1) to give **3e** 80 mg (70% yield) as a pale yellow solid;

$^1\text{H}$  NMR (500 MHz,  $\text{CDCl}_3$ )  $\delta$  8.86 (br, 1H), 7.76 (d,  $J = 9.0$  Hz, 1H), 7.55 (d,  $J = 8.0$  Hz, 3H), 7.37–7.29 (m, 4H), 7.18 (m, 2H), 7.10 (d,  $J = 9.0$  Hz, 1H), 6.97 (dd,  $J$

= 9.0, 7.0 Hz, 1H), 1.62 (s, 9H);

$^{13}\text{C}$  NMR (126 MHz,  $\text{CDCl}_3$ )  $\delta$  135.7, 135.0, 134.7, 132.1 (d,  $J_{\text{C-F}} = 301.1$  Hz), 128.8 (q,  $J_{\text{C-F}} = 32.8$  Hz), 126.3, 126.2, 126.1 (q,  $J_{\text{C-F}} = 3.8$  Hz), 126.0, 125.9, 124.1, 123.8, 122.8, 121.6, 120.8, 120.0, 117.6, 117.1, 111.4, 107.7, 93.3, 62.9, 31.4.

HRMS (EI-TOF) calcd for  $\text{C}_{28}\text{H}_{22}\text{F}_3\text{N}_3$  457.1766, found 457.1765.

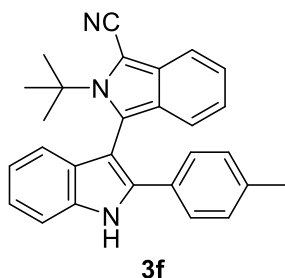

**2-(tert-butyl)-3-(2-(p-tolyl)-1H-indol-3-yl)-2H-isoindole-1-carbonitrile (3f)**

Following the General Procedure, and target product was purified by flash chromatography (PE/EA = 5/1) to give **3f** 80 mg (78% yield) as a pale yellow solid;

$^1\text{H}$  NMR (500 MHz,  $\text{CDCl}_3$ )  $\delta$  8.80 (br, 1H), 7.76 (d,  $J = 9.0$  Hz, 1H), 7.53 (d,  $J = 8.0$  Hz, 1H), 7.31–7.27 (m, 2H), 7.20–7.13 (m, 3H), 7.10 (s, 4H), 6.98–6.93 (m, 1H), 2.32 (s, 3H), 1.63 (s, 9H);

$^{13}\text{C}$  NMR (126 MHz,  $\text{CDCl}_3$ )  $\delta$  138.3, 136.9, 135.4, 133.4, 131.1, 129.9, 128.8, 126.2, 126.1, 125.9, 125.2, 123.1, 122.4, 121.3, 121.1, 119.5, 117.6, 117.5, 111.1, 105.4, 92.7, 62.8, 31.4, 21.2;

HRMS (EI-TOF) calcd for  $\text{C}_{28}\text{H}_{25}\text{N}_3$  403.2048, found 403.2050.

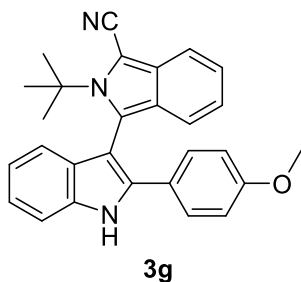

**2-(tert-butyl)-3-(2-(4-methoxyphenyl)-1H-indol-3-yl)-2H-isoindole-1-carbonitrile (3g)**



Following the General Procedure, and target product was purified by flash chromatography (PE/EA = 4/1) to give **3g** 85 mg (81% yield) as a pale yellow solid;

$^1\text{H}$  NMR (500 MHz,  $\text{CDCl}_3$ )  $\delta$  8.61 (br, 1H), 7.75 (d,  $J=9.0$  Hz, 1H), 7.50 (d,  $J=8.0$  Hz, 1H), 7.29 (t,  $J=5.0$  Hz, 2H), 7.18–7.10 (m, 5H), 6.96 (t,  $J=8.0$  Hz, 1H), 6.82 (d,  $J=8.0$  Hz, 2H), 3.78 (s, 3H), 1.61 (s, 9H);

$^{13}\text{C}$  NMR (126 MHz,  $\text{CDCl}_3$ )  $\delta$  159.6, 136.8, 135.3, 133.4, 131.1, 127.5, 126.3, 125.9, 125.1, 124.2, 122.9, 122.4, 121.3, 121.1, 119.4, 117.5, 117.5, 114.7, 111.0, 104.9, 92.7, 62.8, 55.3, 31.4;

HRMS (EI-TOF) calcd for  $\text{C}_{28}\text{H}_{25}\text{N}_3\text{O}$  419.1998, found 419.1994.

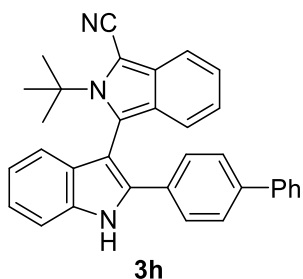

**3-(2-([1,1'-biphenyl]-4-yl)-1H-indol-3-yl)-2-(tert-butyl)-2H-isoindole-1-carbonitrile (**3h**)**

Following the General Procedure, and target product was purified by flash chromatography (PE/EA = 5/1) to give **3h** 84 mg (80% yield) as a pale yellow solid;

$^1\text{H}$  NMR (500 MHz,  $\text{CDCl}_3$ )  $\delta$  8.95 (br, 1H), 7.78 (d,  $J=9.0$  Hz, 1H), 7.58–7.52 (m, 5H), 7.44 (t,  $J=8.0$  Hz, 2H), 7.38–7.34 (m, 1H), 7.34–7.27 (m, 4H), 7.20 (d,  $J=8.0$  Hz, 1H), 7.17–7.13 (m, 2H), 6.97 (dd,  $J=9.0, 7.0$  Hz, 1H), 1.64 (s, 9H);

$^{13}\text{C}$  NMR (126 MHz,  $\text{CDCl}_3$ )  $\delta$  157.0, 140.87, 139.9, 136.3, 135.6, 133.4, 131.1, 130.4, 128.9, 127.7, 126.8, 126.5, 126.2, 126.0, 124.9, 123.3, 122.5, 121.3, 121.2, 119.6, 117.5, 117.4, 111.2, 106.1, 92.9, 62.9, 31.4;

HRMS (EI-TOF) calcd for  $\text{C}_{33}\text{H}_{27}\text{N}_3$  465.2205, found 465.2201.

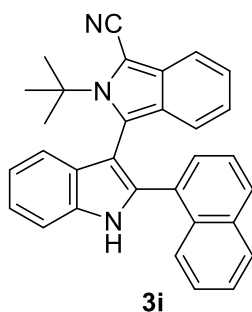

**2-(*tert*-butyl)-3-(2-(naphthalen-1-yl)-1*H*-indol-3-yl)-2*H*-isoindole-1-carbonitrile (3i)**

Following the General Procedure, and target product was purified by flash chromatography (PE/EA = 5/1) to give **3i** 69 mg (70% yield) as a pale yellow solid;

<sup>1</sup>H NMR (500 MHz, CDCl<sub>3</sub>) δ 8.64 (br, 1H), 8.05 (d, *J* = 9.0 Hz, 1H), 7.88 (d, *J* = 8.0 Hz, 1H), 7.80 (d, *J* = 8.0 Hz, 1H), 7.66 (d, *J* = 9.0 Hz, 1H), 7.54 (d, *J* = 8.0 Hz, 1H), 7.49 (t, *J* = 7.0 Hz, 1H), 7.43–7.39 (m, 1H), 7.35–7.32 (m, 1H), 7.30 (d, *J* = 8.0 Hz, 1H), 7.25–7.21 (m, 3H), 7.20–7.16 (m, 2H), 6.96 (dd, *J* = 8.0, 7.0 Hz, 1H), 1.48 (s, 9H);

<sup>13</sup>C NMR (126 MHz, DMSO-*d*<sub>6</sub>) δ 137.2, 136.2, 133.8, 132.8, 131.5, 130.1, 130.0, 129.4, 128.9, 128.2, 127.1, 126.7, 126.4, 126.1, 126.1, 125.7, 122.8, 122.6, 121.6, 120.9, 119.33, 117.2, 112.3, 106.5, 91.8, 62.8, 31.1;

HRMS (EI-TOF) calcd for C<sub>31</sub>H<sub>25</sub>N<sub>3</sub> 439.2048, found 439.2050.

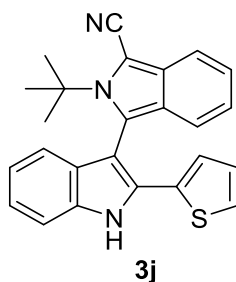

**2-(*tert*-butyl)-3-(2-(thiophen-2-yl)-1*H*-indol-3-yl)-2*H*-isoindole-1-carbonitrile (3j)**

Following the General Procedure, and target product was purified by flash chromatography (PE/EA = 5/1) to give **3j** 70 mg (65% yield) as a pale yellow solid;

$^1\text{H}$  NMR (500 MHz,  $\text{CDCl}_3$ )  $\delta$  8.56 (br, 1H), 7.76 (d,  $J = 9.0$  Hz, 1H), 7.50 (d,  $J = 8.0$  Hz, 1H), 7.30 (d,  $J = 7.0$  Hz, 1H), 7.27 (d,  $J = 3.0$  Hz, 2H), 7.20 (d,  $J = 8.0$  Hz, 1H), 7.15 (d,  $J = 7.0$  Hz, 1H), 7.11 (d,  $J = 9.0$  Hz, 1H), 7.00 (dd,  $J = 3.0, 1.0$  Hz, 1H), 6.95 (dd,  $J = 9.0, 7.0$  Hz, 1H), 6.73 (dd,  $J = 5.0, 1.0$  Hz, 1H), 1.65 (s, 9H);

$^{13}\text{C}$  NMR (126 MHz,  $\text{DMSO-d}_6$ )  $\delta$  136.3, 133.6, 133.3, 132.9, 130.7, 127.8, 127.8, 126.5, 126.1, 125.3, 125.0, 123.2, 122.9, 121.2, 121.0, 118.9, 117.2, 117.1, 112.0, 103.9, 92.8, 63.1, 31.1;

HRMS (EI-TOF) calcd for  $\text{C}_{25}\text{H}_{21}\text{N}_3\text{S}$  395.1456, found 395.1454.

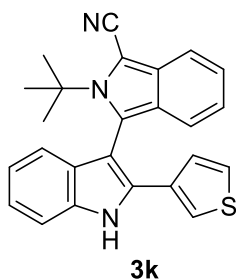

**2-(*tert*-butyl)-3-(2-(thiophen-3-yl)-1*H*-indol-3-yl)-2*H*-isoindole-1-carbonitrile (3k)**

Following the General Procedure, and target product was purified by flash chromatography (PE/EA = 5/1) to give **3k** 81 mg (77% yield) as a pale yellow solid;

$^1\text{H}$  NMR (500 MHz,  $\text{CDCl}_3$ )  $\delta$  8.60 (br, 1H), 7.78–7.74 (m, 1H), 7.49 (d,  $J = 8.0$  Hz, 1H), 7.32–7.29 (m, 1H), 7.28–7.25 (m, 1H), 7.21–7.17 (m, 2H), 7.14 (t,  $J = 7.0$  Hz, 1H), 7.08–7.05 (m, 1H), 6.99 (d,  $J = 4.0$  Hz, 2H), 6.94 (dd,  $J = 9.0, 7.0$  Hz, 1H), 1.71 (s, 9H);

$^{13}\text{C}$  NMR (126 MHz,  $\text{DMSO-d}_6$ )  $\delta$  136.0, 133.8, 133.1, 132.9, 130.7, 128.0, 126.6, 126.2, 125.7, 125.6, 122.9, 122.8, 122.5, 121.4, 120.9, 119.0, 117.3, 117.2, 112.0, 103.5, 92.2, 63.1, 31.1;

HRMS (EI-TOF) calcd for  $\text{C}_{25}\text{H}_{21}\text{N}_3\text{S}$  395.1456, found 395.1454.

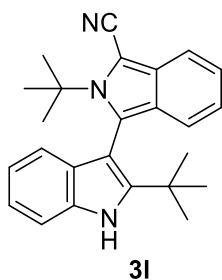

**2-(tert-butyl)-3-(2-(tert-butyl)-1H-indol-3-yl)-2H-isoindole-1-carbonitrile (3j)**

Following the General Procedure, and target product was purified by flash chromatography (PE/EA = 5/1) to give **3j** 69 mg (66% yield) as a pale yellow solid;

$^1\text{H}$  NMR (500 MHz,  $\text{CDCl}_3$ )  $\delta$  8.30 (br, 1H), 7.67 (d,  $J = 9.0$  Hz, 1H), 7.39 (d,  $J = 8.0$  Hz, 1H), 7.23–7.17 (m, 2H), 7.05–7.02 (m, 2H), 6.96 (d,  $J = 8.0$  Hz, 1H), 6.91 (dd,  $J = 9.0, 7.0$  Hz, 1H), 1.77 (s, 9H), 1.24 (s, 9H);

$^{13}\text{C}$  NMR (126 MHz,  $\text{CDCl}_3$ )  $\delta$  145.1, 134.2, 133.1, 131.3, 126.3, 125.8, 122.2, 122.0, 121.6, 120.5, 119.0, 117.6, 117.3, 110.5, 103.3, 92.4, 62.8, 33.3, 31.5, 30.4;

HRMS (EI-TOF) calcd for  $\text{C}_{25}\text{H}_{27}\text{N}_3$  369.2205, found 369.2202.

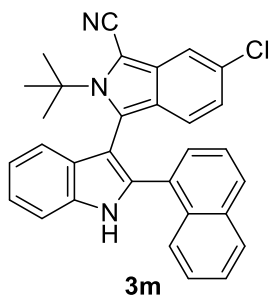

**2-(tert-butyl)-6-chloro-3-(2-(naphthalen-1-yl)-1H-indol-3-yl)-2H-isoindole-1-carbonitrile (3m)**

Following the General Procedure, and target product was purified by flash chromatography (PE/EA = 5/1) to give **3m** 68 mg (60% yield) as a pale yellow solid;

$^1\text{H}$  NMR (500 MHz,  $\text{CDCl}_3$ )  $\delta$  8.68 (br, 1H), 8.02 (d,  $J = 9.0$  Hz, 1H), 7.90–7.86 (m, 1H), 7.81 (d,  $J = 8.0$  Hz, 1H), 7.64 (d,  $J = 2.0$  Hz, 1H), 7.54 (d,  $J = 8.0$  Hz, 1H), 7.52–7.49 (m, 1H), 7.43 (m, 1H), 7.34 (m, 1H), 7.28 (d,  $J = 7.0$  Hz, 2H), 7.20 (m, 1H), 7.17–7.11 (m, 2H), 6.88 (dd,  $J = 9.0, 2.0$  Hz, 1H), 1.48 (s, 9H);

$^{13}\text{C}$  NMR (126 MHz,  $\text{CDCl}_3$ )  $\delta$  136.9, 135.4, 134.0, 133.3, 132.0, 131.2, 129.9, 129.5, 129.0, 128.9, 128.3, 126.9, 126.3, 125.4, 125.1, 125.0, 124.9, 123.8, 123.3, 122.8, 121.3, 119.7, 116.5, 111.22, 107.6, 92.6, 63.0, 31.4;

HRMS (EI-TOF) calcd for  $\text{C}_{31}\text{H}_{24}\text{ClN}_3$  473.1659, found 473.1655.

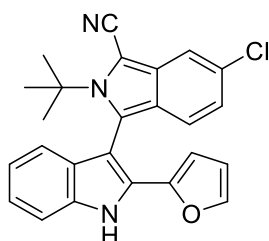

**3n**

**2-(*tert*-butyl)-6-chloro-3-(2-(furan-2-yl)-1*H*-indol-3-yl)-2*H*-isoindole-1-carbonitrile (3n)**

Following the General Procedure, and target product was purified by flash chromatography (PE/EA = 5/1) to give **3n** 66 mg (57% yield) as a pale yellow solid;

$^1\text{H}$  NMR (500 MHz,  $\text{DMSO-d}_6$ )  $\delta$  7.69–7.63 (m, 1H), 7.54–7.50 (m, 2H), 7.37 (dd,  $J = 3.0, 1.0$  Hz, 1H), 7.20 (m, 1H), 7.05–7.00 (m, 2H), 6.94–6.88 (m, 2H), 6.68 (dd,  $J = 5.0, 1.0$  Hz, 1H), 1.60 (s, 9H);

$^{13}\text{C}$  NMR (126 MHz,  $\text{DMSO-d}_6$ )  $\delta$  136.0, 134.0, 133.1, 132.7, 131.8, 130.6, 128.1, 127.0, 125.6, 124.0, 123.9, 123.7, 122.9, 122.7, 121.0, 118.9, 116.5, 116.1, 112.0, 102.8, 92.3, 63.6, 31.0;

HRMS (EI-TOF) calcd for  $\text{C}_{25}\text{H}_{20}\text{ClN}_3\text{O}$  413.1295, found 413.1299.

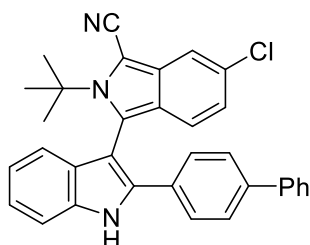

**3o**

**3-(2-([1,1'-biphenyl]-4-yl)-1*H*-indol-3-yl)-2-(*tert*-butyl)-6-chloro-2*H*-isoindol**

### e-1-carbonitrile (**3o**)

Following the General Procedure, and target product was purified by flash chromatography (PE/EA = 5/1) to give **3o** 84 mg (79% yield) as a pale yellow solid;

$^1\text{H}$  NMR (500 MHz,  $\text{CDCl}_3$ )  $\delta$  8.74 (br, 1H), 7.74 (d,  $J = 2.0$  Hz, 1H), 7.56–7.51 (m, 5H), 7.42 (t,  $J = 8.0$  Hz, 2H), 7.37–7.33 (m, 1H), 7.30 (m, 1H), 7.24–7.20 (m, 2H), 7.17–7.13 (m, 2H), 7.06 (d,  $J = 9.0$  Hz, 1H), 6.88 (dd,  $J = 9.0, 2.0$  Hz, 1H), 1.61 (s, 9H);

$^{13}\text{C}$  NMR (126 MHz,  $\text{CDCl}_3$ )  $\delta$  141.0, 139.7, 136.4, 135.5, 133.5, 132.4, 130.9, 130.2, 128.9, 127.8, 126.9, 126.4, 125.4, 124.4, 124.0, 123.5, 122.8, 121.4, 119.4, 116.7, 116.5, 111.2, 105.5, 92.8, 63.2, 31.3;

HRMS (EI-TOF) calcd for  $\text{C}_{35}\text{H}_{32}\text{ClN}_3$  499.1815, found 499.1814.

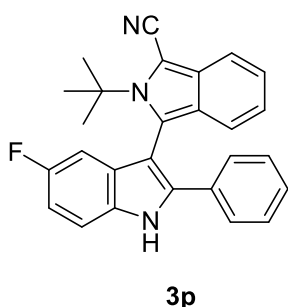

### 2-(*tert*-butyl)-3-(5-fluoro-2-phenyl-1*H*-indol-3-yl)-2*H*-isoindole-1-carbonitril e (**3p**)

Following the General Procedure, and target product was purified by flash chromatography (PE/EA = 5/1) to give **3p** 77 mg (75% yield) as a pale yellow solid;

$^1\text{H}$  NMR (500 MHz,  $\text{CDCl}_3$ )  $\delta$  8.79 (br, 1H), 7.76 (d,  $J = 9.0$  Hz, 1H), 7.46 (dd,  $J = 9.0, 4.0$  Hz, 1H), 7.31–7.28 (m, 4H), 7.18–7.15 (m, 2H), 7.14 (s, 1H), 7.04 (m, 1H), 6.99 (m, 1H), 6.84 (dd,  $J = 9.0, 3.0$  Hz, 1H), 1.59 (s, 9H);

$^{13}\text{C}$  NMR (126 MHz,  $\text{CDCl}_3$ )  $\delta$  158.8 (d,  $J = 240.0$  Hz), 138.6, 133.3, 131.9, 131.4, 131.3 (d,  $J = 10.0$  Hz), 129.3, 128.6, 126.3, 126.2, 126.0, 124.0, 122.6, 121.0, 117.6, 117.3, 112.1 (d,  $J = 10.0$  Hz), 111.8 (d,  $J = 30.0$  Hz), 106.1 (d,  $J = 5.0$  Hz),

104.5 (d,  $J = 24.0$  Hz), 93.1, 62.8, 31.4;

HRMS (EI-TOF) calcd for  $C_{27}H_{22}FN_3$  407.1798, found 407.1799.

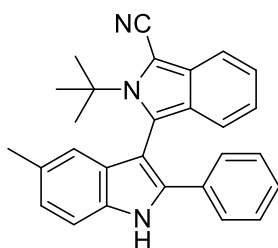

**3q**

**2-(*tert*-butyl)-3-(5-methyl-2-phenyl-1*H*-indol-3-yl)-2*H*-isoindole-1-carbonitrile (3q)**

Following the General Procedure, and target product was purified by flash chromatography (PE/EA = 5/1) to give **3q** 87 mg (80% yield) as a pale yellow solid;

$^1H$  NMR (500 MHz,  $CDCl_3$ )  $\delta$  8.63 (br, 1H), 7.77 (m, 1H), 7.41 (d,  $J = 8.0$  Hz, 1H), 7.31–7.26 (m, 4H), 7.18–7.15 (m, 3H), 7.13 (dd,  $J = 8.0, 2.0$  Hz, 1H), 6.99–6.95 (m, 2H), 2.40 (s, 3H), 1.60 (s, 9H);

$^{13}C$  NMR (126 MHz,  $CDCl_3$ )  $\delta$  136.7, 133.8, 133.4, 131.8, 131.3, 130.6, 129.2, 128.2, 126.2, 126.1, 125.9, 125.1, 125.0, 122.4, 121.3, 119.2, 117.5, 110.8, 105.6, 92.7, 62.8, 31.4, 21.5;

HRMS (EI-TOF) calcd for  $C_{28}H_{25}N_3$  403.2048, found 403.2044.

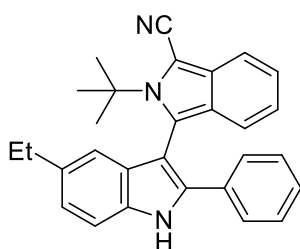

**3r**

**2-(*tert*-butyl)-3-(5-ethyl-2-phenyl-1*H*-indol-3-yl)-2*H*-isoindole-1-carbonitrile (3q)**

Following the General Procedure, and target product was purified by flash

chromatography (PE/EA = 5/1) to give **3r** 85 mg (76% yield) as a pale yellow solid;

$^1\text{H}$  NMR (500 MHz,  $\text{CDCl}_3$ )  $\delta$  8.63 (br, 1H), 7.77 (dd,  $J = 9.0, 1.0$  Hz, 1H), 7.44 (d,  $J = 8.0$  Hz, 1H), 7.31–7.26 (m, 4H), 7.17 (dd,  $J = 8.0, 2.0$  Hz, 4H), 7.00–6.95 (m, 2H), 2.69 (m, 2H), 1.62 (s, 9H), 1.24 (t,  $J = 8.0$  Hz, 3H);

$^{13}\text{C}$  NMR (126 MHz,  $\text{CDCl}_3$ )  $\delta$  137.4, 136.7, 134.0, 133.4, 131.8, 131.2, 129.2, 128.2, 126.2, 126.1, 125.9, 125.2, 123.9, 122.4, 121.4, 118.0, 117.5, 117.5, 110.9, 105.7, 92.8, 62.8, 31.4, 29.0, 16.4;

HRMS (EI-TOF) calcd for  $\text{C}_{29}\text{H}_{27}\text{N}_3$  417.2205, found 417.2204.

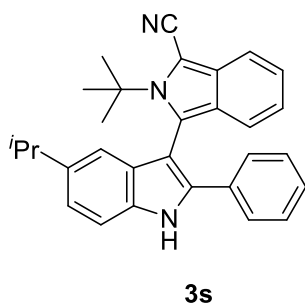

**2-(*tert*-butyl)-3-(5-isopropyl-2-phenyl-1*H*-indol-3-yl)-2*H*-isoindole-1-carbonitrile (3s)**

Following the General Procedure, and target product was purified by flash chromatography (PE/EA = 5/1) to give **3s** 82 mg (71% yield) as a pale yellow solid;

$^1\text{H}$  NMR (500 MHz,  $\text{CDCl}_3$ )  $\delta$  8.64 (br, 1H), 7.77 (dd,  $J = 9.0, 1.0$  Hz, 1H), 7.46 (d,  $J = 8.0$  Hz, 1H), 7.31–7.26 (m, 4H), 7.21 (dd,  $J = 8.0, 2.0$  Hz, 1H), 7.19–7.16 (m, 3H), 7.01 (d,  $J = 2.0$  Hz, 1H), 6.98–6.94 (m, 1H), 2.96 (m, 1H), 1.63 (s, 9H), 1.26 (dd,  $J = 7.0, 3.0$  Hz, 6H);

$^{13}\text{C}$  NMR (126 MHz,  $\text{CDCl}_3$ )  $\delta$  142.1, 136.7, 134.1, 133.4, 131.8, 131.2, 129.2, 128.1, 126.2, 126.1, 125.9, 125.2, 122.4, 122.3, 121.4, 117.5, 117.4, 116.6, 110.9, 105.8, 92.8, 62.8, 34.2, 31.4, 24.8, 24.4;

HRMS (EI-TOF) calcd for  $\text{C}_{30}\text{H}_{29}\text{N}_3$  431.2361, found 431.2360.



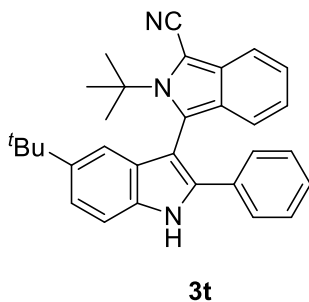

**2-(*tert*-butyl)-3-(5-(*tert*-butyl)-2-phenyl-1*H*-indol-3-yl)-2*H*-isoindole-1-carbonitrile (3t)**

Following the General Procedure, and target product was purified by flash chromatography (PE/EA = 5/1) to give **3t** 83 mg (70% yield) as a pale yellow solid;

$^1\text{H}$  NMR (500 MHz,  $\text{CDCl}_3$ )  $\delta$  8.65 (br, 1H), 7.77 (m, 1H), 7.47 (d,  $J = 9.0$  Hz, 1H), 7.40 (dd,  $J = 9.0, 2.0$  Hz, 1H), 7.30–7.25 (m, 4H), 7.19–7.15 (m, 4H), 6.96 (m, 1H), 1.65 (s, 9H), 1.33 (s, 9H);

$^{13}\text{C}$  NMR (126 MHz,  $\text{CDCl}_3$ )  $\delta$  144.4, 136.7, 133.7, 133.4, 131.8, 130.9, 129.2, 128.1, 126.1, 125.9, 125.3, 122.3, 121.6, 121.4, 117.5, 117.4, 115.5, 110.6, 106.1, 92.8, 62.8, 34.7, 31.9, 31.4;

HRMS (EI-TOF) calcd for  $\text{C}_{31}\text{H}_{31}\text{N}_3$  445.2518, found 445.2518.

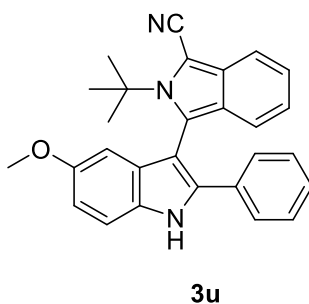

**2-(*tert*-butyl)-3-(5-methoxy-2-phenyl-1*H*-indol-3-yl)-2*H*-isoindole-1-carbonitrile (3u)**

Following the General Procedure, and target product was purified by flash chromatography (PE/EA = 4/1) to give **3u** 93 mg (83% yield) as a pale yellow solid;

$^1\text{H}$  NMR (500 MHz,  $\text{CDCl}_3$ )  $\delta$  8.70 (br, 1H), 7.77 (dd,  $J = 9.0, 1.0$  Hz, 1H), 7.42

(d,  $J = 9.0$  Hz, 1H), 7.32–7.26 (m, 3H), 7.25 (s, 1H), 7.19 (m, 1H), 7.17–7.14 (m, 2H), 7.00–6.94 (m, 2H), 6.60 (d,  $J = 2.0$  Hz, 1H), 3.74 (s, 3H), 1.61 (s, 9H);

$^{13}\text{C}$  NMR (126 MHz,  $\text{CDCl}_3$ )  $\delta$  155.3, 137.4, 133.4, 131.8, 131.4, 130.6, 129.2, 128.2, 126.2, 126.1, 126.0, 125.0, 122.5, 121.3, 117.5, 113.6, 112.1, 105.8, 100.8, 92.8, 62.8, 55.9, 31.4;

HRMS (EI-TOF) calcd for  $\text{C}_{28}\text{H}_{25}\text{N}_3\text{O}$  419.1998, found 419.1996.

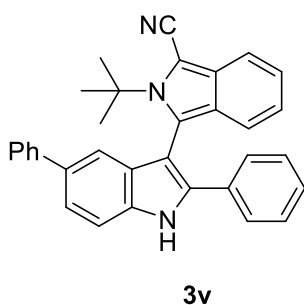

**2-(tert-butyl)-3-(2,5-diphenyl-1H-indol-3-yl)-2H-isoindole-1-carbonitrile (3v)**

Following the General Procedure, and target product was purified by flash chromatography (PE/EA = 5/1) to give **3v** 104 mg (84% yield) as a pale yellow solid;

$^1\text{H}$  NMR (500 MHz,  $\text{CDCl}_3$ )  $\delta$  8.76 (br, 1H), 7.78 (dd,  $J = 9.0, 1.0$  Hz, 1H), 7.60–7.56 (m, 4H), 7.43–7.39 (m, 3H), 7.30 (m, 5H), 7.20 (m, 3H), 7.00–6.96 (m, 1H), 1.63 (s, 9H);

$^{13}\text{C}$  NMR (126 MHz,  $\text{CDCl}_3$ )  $\delta$  141.8, 137.4, 135.0, 134.8, 133.4, 131.6, 131.5, 129.3, 128.7, 128.4, 127.3, 126.7, 126.3, 126.2, 126.0, 124.6, 123.1, 122.6, 121.2, 117.8, 117.5, 117.4, 111.5, 106.4, 93.0, 62.8, 31.4;

HRMS (EI-TOF) calcd for  $\text{C}_{33}\text{H}_{27}\text{N}_3$  465.2205, found 465.2204.

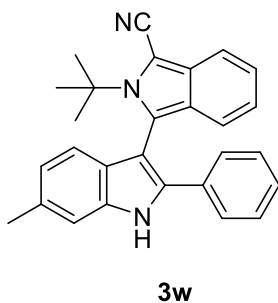

**2-(*tert*-butyl)-3-(6-methyl-2-phenyl-1*H*-indol-3-yl)-2*H*-isoindole-1-carbonitri  
le (3w)**

Following the General Procedure, and target product was purified by flash chromatography (PE/EA = 5/1) to give **3w** 70 mg (69% yield) as a pale yellow solid;

<sup>1</sup>H NMR (500 MHz, CDCl<sub>3</sub>) δ 8.54 (br, 1H), 7.75 (d, *J* = 9.0 Hz, 1H), 7.32–7.27 (m, 4H), 7.22 (dd, *J* = 8.0, 2.0 Hz, 2H), 7.15 (d, *J* = 9.0 Hz, 1H), 7.12 (d, *J* = 7.0 Hz, 1H), 7.09–7.03 (m, 2H), 6.98–6.94 (m, 1H), 2.66 (s, 3H), 1.60 (s, 9H);

<sup>13</sup>C NMR (126 MHz, CDCl<sub>3</sub>) δ 136.5, 135.1, 133.3, 131.8, 130.6, 129.2, 128.2, 126.3, 126.3, 125.9, 125.0, 123.9, 122.4, 121.3, 121.3, 120.4, 117.5, 117.4, 106.6, 92.8, 62.8, 31.4, 16.7;

HRMS (EI-TOF) calcd for C<sub>28</sub>H<sub>25</sub>N<sub>3</sub> 403.2048, found 403.2044.

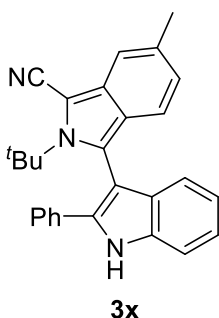

**2-(*tert*-butyl)-6-methyl-3-(2-phenyl-1*H*-indol-3-yl)-2*H*-isoindole-1-carbonitri  
le (3x)**

Following the General Procedure, and target product was purified by flash chromatography (PE/EA = 5/1) to give **3x** 84 mg (78% yield) as a pale yellow solid;

<sup>1</sup>H NMR (500 MHz, DMSO-d<sub>6</sub>) δ 7.53 (d, *J* = 8.0 Hz, 1H), 7.37 (s, 1H), 7.32 (t, *J* = 8.0 Hz, 2H), 7.25 (m, 3H), 7.21 (m, 1H), 7.02 (d, *J* = 4.0 Hz, 2H), 6.85 (d, *J* = 9.0 Hz, 1H), 6.76 (d, *J* = 9.0 Hz, 1H), 2.38 (s, 3H), 1.54 (s, 9H);

<sup>13</sup>C NMR (126 MHz, DMSO-d<sub>6</sub>) δ 136.9, 136.3, 136.2, 133.7, 132.0, 130.8, 129.4, 128.4, 126.6, 126.2, 125.6, 124.3, 123.0, 121.2, 120.9, 119.0, 117.5, 115.7, 112.2, 104.5, 91.3, 62.7, 31.0, 22.1;

HRMS (EI-TOF) calcd for C<sub>28</sub>H<sub>25</sub>N<sub>3</sub> 403.2048, found 403.2044.

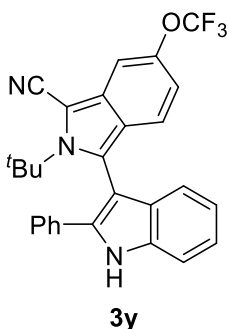

**2-(*tert*-butyl)-3-(2-phenyl-1*H*-indol-3-yl)-6-(trifluoromethoxy)-2*H*-isoindole-1-carbonitrile (3y)**

Following the General Procedure 1, and target product was purified by flash chromatography (PE/EA = 4/1) to give **3y** 75 mg (60% yield) as a pale yellow solid;

<sup>1</sup>H NMR (500 MHz, DMSO-*d*<sub>6</sub>) δ 7.58–7.50 (m, 2H), 7.37–7.32 (m, 2H), 7.29–7.19 (m, 4H), 7.06 (m, 3H), 6.88 (dd, *J* = 9.0, 3.0 Hz, 1H), 1.57 (s, 9H);

<sup>13</sup>C NMR (126 MHz, DMSO-*d*<sub>6</sub>) δ 137.2, 136.3, 132.1, 131.8, 130.7, 129.5, 128.6, 127.2, 126.6, 124.5, 124.0, 123.1, 121.1, 119.0, 117.6, 116.5, 112.3, 108.3, 103.6, 93.2, 63.7, 30.9;

HRMS (EI-TOF) calcd for C<sub>28</sub>H<sub>22</sub>F<sub>3</sub>N<sub>3</sub>O 473.1715, found 473.1717.

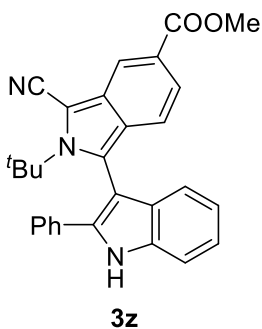

**methyl**

**2-(*tert*-butyl)-3-cyano-1-(2-phenyl-1*H*-indol-3-yl)-2*H*-isoindole-5-carboxylate (3z)**

Following the General Procedure, and target product was purified by flash chromatography (PE/EA = 3/1) to give **3z** 72 mg (64% yield) as a yellow solid;

$^1\text{H}$  NMR (500 MHz, DMSO- $d_6$ )  $\delta$  8.31 (t,  $J$  = 1.0 Hz, 1H), 7.55 (d,  $J$  = 8.0 Hz, 1H), 7.44 (dd,  $J$  = 9.0, 1.0 Hz, 1H), 7.32 (dd,  $J$  = 8.0, 7.0 Hz, 2H), 7.28–7.25 (m, 1H), 7.24–7.21 (m, 3H), 7.08–7.02 (m, 3H), 3.89 (s, 3H), 1.58 (s, 9H);

$^{13}\text{C}$  NMR (126 MHz, DMSO- $d_6$ )  $\delta$  166.8, 137.3, 136.3, 131.8, 131.7, 130.7, 129.5, 128.6, 127.7, 127.0, 126.8, 126.7, 123.1, 122.0, 121.9, 121.1, 120.6, 119.0, 116.3, 112.3, 103.7, 94.4, 63.9, 52.7, 31.0;

HRMS (EI-TOF) calcd for  $\text{C}_{29}\text{H}_{25}\text{N}_3\text{O}_2$  447.1947, found 447.1946.

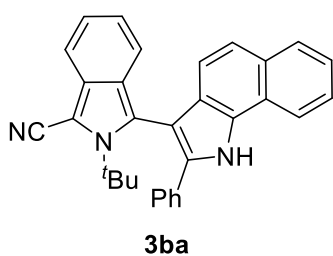

**2-(tert-butyl)-3-(2-phenyl-1H-benzo[g]indol-3-yl)-2H-isoindole-1-carbonitril  
e (3ba)**

Following the General Procedure, and target product was purified by flash chromatography (PE/EA = 5/1) to give **3ba** 80 mg (68% yield) as a pale yellow solid;

$^1\text{H}$  NMR (500 MHz,  $\text{CDCl}_3$ )  $\delta$  8.62 (br, 1H), 8.03 (d,  $J$  = 9.0 Hz, 1H), 7.86 (d,  $J$  = 8.0 Hz, 1H), 7.78 (d,  $J$  = 8.0 Hz, 1H), 7.64 (d,  $J$  = 9.0 Hz, 1H), 7.52 (d,  $J$  = 8.0 Hz, 1H), 7.48 (t,  $J$  = 7.0 Hz, 1H), 7.41–7.37 (m, 1H), 7.33–7.30 (m, 1H), 7.28 (d,  $J$  = 8.0 Hz, 1H), 7.24–7.19 (m, 3H), 7.19–7.14 (m, 2H), 6.95 (dd,  $J$  = 8.0, 7.0 Hz, 1H), 1.46 (s, 9H);

$^{13}\text{C}$  NMR (126 MHz, DMSO- $d_6$ )  $\delta$  137.2, 136.2, 133.8, 132.8, 131.5, 130.1, 123.0, 129.4, 128.9, 128.2, 127.1, 126.7, 126.4, 126.1, 126.1, 125.7, 122.8, 122.6, 121.6, 120.9, 119.3, 117.2, 112.3, 106.5, 91.8, 62.8, 31.1;

HRMS (EI-TOF) calcd for  $\text{C}_{31}\text{H}_{25}\text{N}_3$  439.2048, found 439.2044.

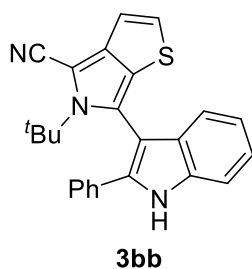

**5-(*tert*-butyl)-6-(2-phenyl-1*H*-indol-3-yl)-5*H*-thieno[2,3-*c*]pyrrole-4-carbonitrile (3bb)**

Following the General Procedure, and target product was purified by flash chromatography (PE/EA = 4/1) to give **3bb** 71 mg (72% yield) as a pale yellow solid;

<sup>1</sup>H NMR (500 MHz, CDCl<sub>3</sub>) δ 8.58 (br, 1H), 7.74–7.72 (d, *J* = 8.0 Hz, 1H), 7.47 (d, *J* = 8.0 Hz, 1H), 7.30–7.26 (m, 1H), 7.25–7.22 (m, 1H), 7.19–7.14 (m, 2H), 7.12 (t, *J* = 7.0 Hz, 1H), 7.06–7.03 (m, 1H), 6.96 (d, *J* = 4.0 Hz, 2H), 6.91 (dd, *J* = 9.0, 7.0 Hz, 1H), 1.69 (s, 9H);

<sup>13</sup>C NMR (126 MHz, DMSO-*d*<sub>6</sub>) δ 141.3, 136.4, 136.2, 133.0, 132.0, 129.7, 129.5, 129.1, 128.6, 127.9, 126.7, 123.5, 123.0, 121.0, 119.0, 115.7, 112.3, 105.3, 91.4, 62.6, 31.0;

HRMS (EI-TOF) calcd for C<sub>25</sub>H<sub>21</sub>N<sub>3</sub>S 395.1456, found 395.1454.

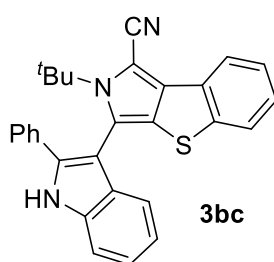

**2-(*tert*-butyl)-3-(2-phenyl-1*H*-indol-3-yl)-2*H*-benzo[4,5]thieno[2,3-*c*]pyrrole-1-carbonitrile (3bc)**

Following the General Procedure, and target product was purified by flash chromatography (PE/EA = 3/1) to give **3bc** 68 mg (63% yield) as a pale yellow solid;

<sup>1</sup>H NMR (500 MHz, DMSO-*d*<sub>6</sub>) δ 8.07 (dd, *J* = 8.0, 1.0 Hz, 1H), 7.83 (d, *J* = 8.0

Hz, 1H), 7.54–7.50 (m, 2H), 7.45 (dd,  $J = 8.0, 1.0$  Hz, 1H), 7.43–7.39 (m, 3H), 7.38 (d,  $J = 8.0$  Hz, 1H), 7.32–7.28 (m, 1H), 7.22 (m, 2H), 7.08 (m, 1H), 1.52 (s, 9H);

$^{13}\text{C}$  NMR (126 MHz, DMSO- $d_6$ )  $\delta$  144.2, 136.7, 136.3, 135.6, 131.9, 129.7, 129.6, 129.5, 128.6, 127.4, 126.8, 125.9, 125.7, 124.8, 124.3, 123.1, 122.0, 121.0, 119.0, 116.6, 112.3, 104.9, 93.1, 62.9, 31.0;

HRMS (EI-TOF) calcd for  $\text{C}_{29}\text{H}_{23}\text{N}_3\text{S}$  445.1613, found 445.1610.

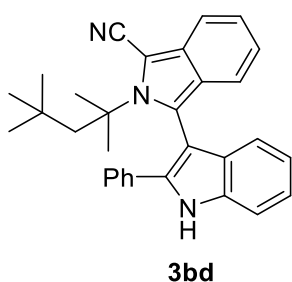

**3-(2-phenyl-1H-indol-3-yl)-2-(2,4,4-trimethylpentan-2-yl)-2H-isoindole-1-carbonitrile (3bd)**

Following the General Procedure, and target product was purified by flash chromatography (PE/EA = 6/1) to give **3bd** 86 mg (77% yield) as a pale yellow solid;

$^1\text{H}$  NMR (500 MHz,  $\text{CDCl}_3$ )  $\delta$  8.63 (br, 1H), 7.77 (d,  $J = 9.0$  Hz, 1H), 7.53 (d,  $J = 8.0$  Hz, 1H), 7.32–7.28 (m, 5H), 7.25 (d,  $J = 8.0$  Hz, 1H), 7.21 (d,  $J = 9.0$  Hz, 1H), 7.14 (m, 3H), 7.01 (dd,  $J = 9.0, 7.0$  Hz, 1H), 2.55 (d,  $J = 16.0$  Hz, 1H), 1.80 (d,  $J = 16.0$  Hz, 1H), 1.56 (s, 3H), 1.38 (s, 3H), 0.68 (s, 9H);

$^{13}\text{C}$  NMR (126 MHz,  $\text{CDCl}_3$ )  $\delta$  137.2, 135.5, 133.1, 132.0, 130.5, 129.3, 128.4, 126.9, 126.8, 125.8, 124.8, 123.2, 122.5, 121.3, 121.1, 120.0, 117.7, 117.6, 111.2, 106.3, 93.6, 66.6, 55.0, 31.7, 31.6, 31.0, 30.6;

HRMS (EI-TOF) calcd for  $\text{C}_{31}\text{H}_{31}\text{N}_3$  445.2518, found 445.2515.

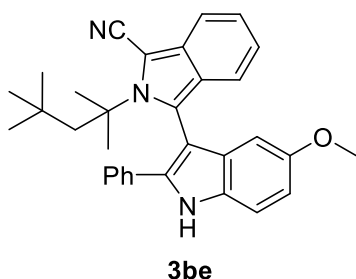

**3-(5-methoxy-2-phenyl-1H-indol-3-yl)-2-(2,4,4-trimethylpentan-2-yl)-2H-isoin-dole-1-carbonitrile (3be)**

Following the General Procedure, and target product was purified by flash chromatography (PE/EA = 3/1) to give **3be** 96 mg (81% yield) as a pale yellow solid;

$^1\text{H}$  NMR (500 MHz,  $\text{CDCl}_3$ )  $\delta$  8.59 (br, 1H), 7.78 (d,  $J = 9.0$  Hz, 1H), 7.42 (d,  $J = 9.0$  Hz, 1H), 7.32 (dd,  $J = 9.0, 7.0$  Hz, 1H), 7.28–7.23 (m, 4H), 7.10 (dd,  $J = 7.0, 3.0$  Hz, 2H), 7.02 (dd,  $J = 9.0, 7.0$  Hz, 1H), 6.95 (dd,  $J = 9.0, 2.0$  Hz, 1H), 6.65 (d,  $J = 2.0$  Hz, 1H), 3.72 (s, 3H), 2.61 (d,  $J = 16.0$  Hz, 1H), 1.77 (d,  $J = 16.0$  Hz, 1H), 1.56 (s, 3H), 1.39 (s, 3H), 0.71 (s, 9H);

$^{13}\text{C}$  NMR (126 MHz,  $\text{CDCl}_3$ )  $\delta$  155.1, 137.8, 133.2, 132.1, 131.0, 130.5, 129.2, 128.3, 126.8, 126.6, 125.9, 125.1, 122.5, 121.3, 117.7, 113.8, 112.1, 106.0, 101.0, 93.6, 66.6, 55.7, 55.0, 31.8, 31.7, 30.8, 30.7;

HRMS (EI-TOF) calcd for  $\text{C}_{32}\text{H}_{33}\text{N}_3\text{O}$  475.2624, found 475.2625.

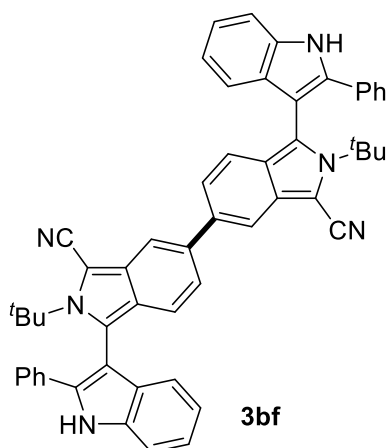

**2,2'-di-tert-butyl-1,1'-bis(2-phenyl-1H-indol-3-yl)-2H,2'H-[5,5'-biisindole]-3,3'-dicarbonitrile (3bf)**



Following the General Procedure, and target product was purified by flash chromatography (PE/EA = 1/1) to give **3bf** 56 mg (52% yield) as a yellow solid;

$^1\text{H}$  NMR (500 MHz,  $\text{CDCl}_3$ )  $\delta$  8.92 (br, 1H), 7.78–7.70 (m, 1H), 7.56–7.51 (m, 1H), 7.33–7.28 (m, 4H), 7.19–7.14 (m, 4H), 7.07 (d,  $J = 9.0$  Hz, 1H), 6.89 (dd,  $J = 9.0$ , 2.0 Hz, 1H), 1.59 (s, 9H);

$^{13}\text{C}$  NMR (126 MHz,  $\text{CDCl}_3$ )  $\delta$  136.9, 135.5, 133.5, 132.3, 131.5, 130.8, 129.3, 128.4, 126.2, 125.5, 124.4, 123.9, 123.4, 122.9, 121.3, 119.4, 116.8, 116.5, 111.3, 105.3, 92.6, 65.9, 31.3;

HRMS (EI-TOF) calcd for  $\text{C}_{54}\text{H}_{44}\text{N}_6$  776.3627, found 776.3626.

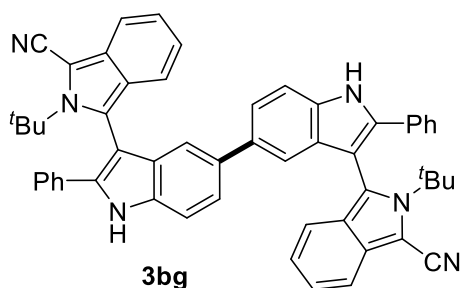

**3,3'-(2,2'-diphenyl-1H,1'H-[5,5'-biindole]-3,3'-diyl)bis(2-(tert-butyl)-2H-isoin-1-carbonitrile) (3bh)**

Following the General Procedure, and target product was purified by flash chromatography (PE/EA = 2/1) to give **4a** 56 mg (58% yield) as a yellow solid;

$^1\text{H}$  NMR (500 MHz, DMSO)  $\delta$  7.63 (dd,  $J = 9.0$ , 1.0 Hz, 1H), 7.56 (d,  $J = 9.0$  Hz, 1H), 7.34 (dd,  $J = 8.0$ , 7.0 Hz, 2H), 7.30–7.27 (m, 2H), 7.22 (m, 3H), 7.05 (d,  $J = 2.0$  Hz, 1H), 6.99–6.94 (m, 2H), 1.54 (s, 9H);

$^{13}\text{C}$  NMR (126 MHz, DMSO)  $\delta$  138.8, 134.7, 133.0, 131.8, 131.5, 129.5, 128.9, 126.7, 126.7, 125.8, 125.5, 125.1, 123.1, 121.2, 118.0, 117.4, 117.1, 113.9, 104.1, 92.5, 63.1, 31.1;

HRMS (EI-TOF) calcd for  $\text{C}_{54}\text{H}_{44}\text{N}_6$  776.3627, found 776.3625.

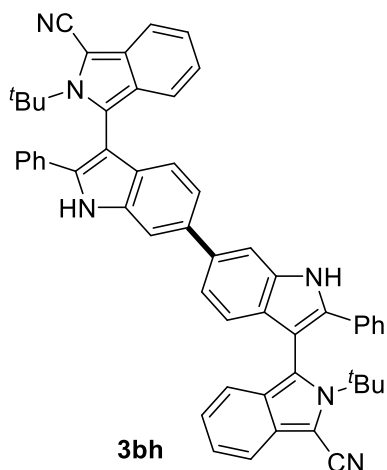

**3,3'-(2,2'-diphenyl-1*H*,1'*H*-[6,6'-biindole]-3,3'-diyl)bis(2-(*tert*-butyl)-2*H*-isoindole-1-carbonitrile) (3bh)**

Following the General Procedure, and target product was purified by flash chromatography (PE/EA = 1/1) to give **3bh** 58 mg (60% yield) as a yellow solid;

$^1\text{H}$  NMR (500 MHz, DMSO)  $\delta$  7.60 (d,  $J = 9.0$  Hz, 1H), 7.54 (d,  $J = 8.0$  Hz, 1H), 7.34–7.26 (m, 4H), 7.25–7.19 (m, 3H), 7.06 (d,  $J = 8.0$  Hz, 1H), 7.01 (d,  $J = 8.0$  Hz, 1H), 6.96 (dd,  $J = 9.0, 6.0$  Hz, 1H), 1.55 (s, 9H);

$^{13}\text{C}$  NMR (126 MHz, DMSO)  $\delta$  157.6, 138.3, 137.7, 132.7, 131.4, 129.4, 128.9, 127.0, 126.7, 126.7, 126.6, 126.0, 124.3, 123.8, 122.9, 121.5, 121.2, 117.1, 111.6, 103.3, 91.7, 62.9, 31.0;

HRMS (EI-TOF) calcd for  $\text{C}_{54}\text{H}_{44}\text{N}_6$  776.3627, found 776.3622.

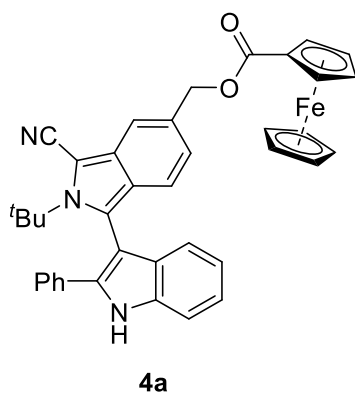

**(2-(*tert*-butyl)-3-cyano-1-(2-phenyl-1*H*-indol-3-yl)-2*H*-isoindol-5-yl) ferronece formate (4a)**

Following the General Procedure, and target product was purified by flash chromatography (PE/EA = 3/1) to give **4a** 42 mg (53% yield) as a pale yellow solid;

$^1\text{H}$  NMR (500 MHz,  $\text{CDCl}_3$ )  $\delta$  8.79 (br, 1H), 7.84 (s, 1H), 7.50 (d,  $J = 8.0$  Hz, 1H), 7.29–7.27 (m, 1H), 7.20–7.15 (m, 4H), 7.14 (dd,  $J = 5.0, 3.0$  Hz, 3H), 7.10 (t,  $J = 7.0$  Hz, 1H), 7.02 (d,  $J = 9.0$  Hz, 1H), 5.39–5.32 (m, 2H), 4.85 (m, 2H), 4.41–4.38 (m, 2H), 4.11–4.08 (m, 5H), 1.56 (s, 9H);

$^{13}\text{C}$  NMR (126 MHz,  $\text{CDCl}_3$ )  $\delta$  171.7, 136.8, 135.5, 134.4, 133.1, 131.6, 130.9, 129.2, 128.3, 126.2, 125.9, 125.0, 123.3, 123.0, 121.7, 121.2, 119.6, 117.2, 117.0, 111.2, 105.8, 93.2, 71.4, 71.0, 70.3, 69.8, 66.2, 62.9, 31.3.

HRMS (EI-TOF) calcd for  $\text{C}_{39}\text{H}_{33}\text{FeN}_3\text{O}_2$  631.1922, found 631.1919.

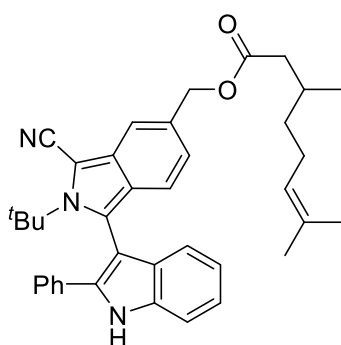

**4b**

**(2-(tert-butyl)-3-cyano-1-(2-phenyl-1H-indol-3-yl)-2H-isoindol-5-yl)methyl 3,7-dimethyloct-6-enoate (4b)**

Following the General Procedure, and target product was purified by flash chromatography (PE/EA = 2/1) to give **4b** 45 mg (62% yield) as a pale yellow oil;

$^1\text{H}$  NMR (500 MHz,  $\text{CDCl}_3$ )  $\delta$  9.00 (br,  $J = 7.0$  Hz, 1H), 7.75 (s, 1H), 7.54 (dd,  $J = 8.0, 2.0$  Hz, 1H), 7.33–7.28 (m, 4H), 7.21 (m, 2H), 7.16 (dd,  $J = 7.0, 5.0$  Hz, 3H), 6.92 (dd,  $J = 9.0, 2.0$  Hz, 1H), 5.23 (s, 2H), 5.10 (m, 1H), 2.47–2.41 (m, 1H), 2.27–2.21 (m, 1H), 2.05–2.00 (m, 2H), 1.74 (d,  $J = 30.0$  Hz, 1H), 1.70–1.66 (m, 3H), 1.60 (d,  $J = 2.0$  Hz, 12H), 1.43–1.37 (m, 1H), 1.28 (m, 1H), 0.99 (dd,  $J = 7.0, 2.0$  Hz, 3H);

$^{13}\text{C}$  NMR (126 MHz,  $\text{CDCl}_3$ )  $\delta$  173.3, 136.8, 135.6, 133.8, 133.1, 131.7, 131.6, 130.9, 130.9, 129.2, 128.3, 126.3, 125.9, 125.1, 124.3, 123.3, 122.7, 121.8, 121.2, 119.5, 117.2, 116.8, 111.3, 105.7, 93.2, 66.6, 63.0, 41.9, 36.8, 31.3, 25.7, 25.4, 19.7, 17.7;

HRMS (EI-TOF) calcd for  $\text{C}_{33}\text{H}_{41}\text{N}_3\text{O}_2$  571.3199, found 571.3202.

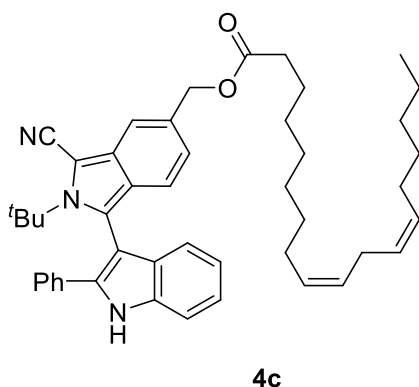

**(2-(*tert*-butyl)-3-cyano-1-(2-phenyl-1*H*-indol-3-yl)-2*H*-isoindol-5-yl)methyl (9*Z*,12*Z*)-octadeca-9,12-dienoate (3bh)**

Following the General Procedure, and target product was purified by flash chromatography (PE/EA = 3/1) to give **4c** 55 mg (46% yield) as a pale yellow oil;

$^1\text{H}$  NMR (500 MHz,  $\text{CDCl}_3$ )  $\delta$  8.82 (br,  $J = 10.0$  Hz, 1H), 7.74 (s, 1H), 7.53 (d,  $J = 8.0$  Hz, 1H), 7.32–7.27 (m, 4H), 7.20–7.17 (m, 2H), 7.17–7.12 (m, 3H), 6.92 (dd,  $J = 9.0, 2.0$  Hz, 1H), 5.42–5.33 (m, 4H), 5.22 (s, 2H), 2.79 (t,  $J = 7.0$  Hz, 2H), 2.41 (t,  $J = 8.0$  Hz, 2H), 2.09–2.04 (m, 4H), 1.59 (s, 9H), 1.38–1.29 (m, 16H), 0.91 (t,  $J = 7.0$  Hz, 3H);

$^{13}\text{C}$  NMR (126 MHz,  $\text{CDCl}_3$ )  $\delta$  173.9, 136.8, 135.5, 133.8, 131.6, 130.9, 130.2, 130.1, 129.2, 128.3, 128.1, 128.0, 126.3, 125.9, 125.0, 123.3, 122.7, 121.8, 121.2, 119.5, 117.2, 116.8, 111.3, 105.7, 93.2, 66.6, 63.0, 34.4, 31.5, 31.3, 29.6, 29.4, 29.2, 29.2, 29.1, 27.2, 25.7, 25.0, 22.6, 14.1;

HRMS (EI-TOF) calcd for  $\text{C}_{46}\text{H}_{55}\text{N}_3\text{O}_2$  681.4294, found 681.4260.

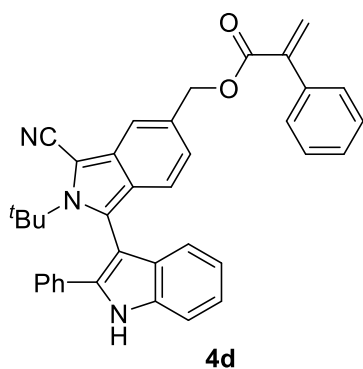

**(2-(*tert*-butyl)-3-cyano-1-(2-phenyl-1*H*-indol-3-yl)-2*H*-isoindol-5-yl)methyl  
2-phenylacrylate (**4d**)**

Following the General Procedure, and target product was purified by flash chromatography (PE/EA = 3/1) to give **4d** 41 mg (58% yield) as a white solid;

<sup>1</sup>H NMR (500 MHz, CDCl<sub>3</sub>) δ 8.70 (br, 1H), 7.66 (t, *J* = 1.0 Hz, 1H), 7.41 (d, *J* = 8.0 Hz, 1H), 7.38–7.34 (m, 2H), 7.30–7.28 (m, 1H), 7.27–7.24 (m, 2H), 7.21–7.17 (m, 4H), 7.07 (m, 3H), 7.05–7.02 (m, 2H), 6.84 (dd, *J* = 9.0, 1.0 Hz, 1H), 6.35 (d, *J* = 1.0 Hz, 1H), 5.85 (d, *J* = 1.0 Hz, 1H), 5.27 (s, 2H), 1.49 (s, 9H);

<sup>13</sup>C NMR (126 MHz, CDCl<sub>3</sub>) δ 166.7, 141.2, 136.7, 136.6, 135.5, 133.6, 133.1, 131.6, 130.9, 129.3, 128.8, 128.4, 128.2, 128.2, 127.3, 126.2, 125.9, 125.0, 123.3, 122.7, 121.8, 121.2, 119.6, 117.1, 116.8, 111.2, 105.8, 93.3, 67.3, 63.0, 31.3;

HRMS (EI-TOF) calcd for C<sub>37</sub>H<sub>31</sub>N<sub>3</sub>O<sub>2</sub> 549.2419, found 549.2417.

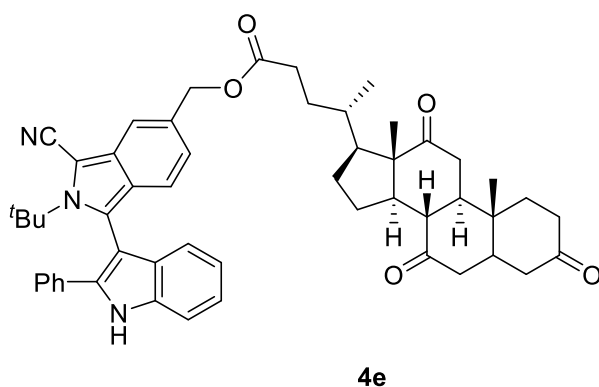

**(2-(*tert*-butyl)-3-cyano-1-(2-phenyl-1*H*-indol-3-yl)-2*H*-isoindol-5-yl)methyl  
(4*S*)-4-((8*S*,9*R*,10*R*,13*S*,14*R*,17*S*)-10,13-dimethyl-3,7,12-trioxohexadecahydro-1*H***

**-cyclopenta[*a*]phenanthren-17-yl)pentanoate (4e)**

Following the General Procedure, and target product was purified by flash chromatography (PE/EA = 1/1) to give **4e** 74 mg (31% yield) as a pale yellow solid;

<sup>1</sup>H NMR (500 MHz, CDCl<sub>3</sub>) δ 8.79 (br, *J* = 4.0 Hz, 1H), 7.70 (s, 1H), 7.49 (d, *J* = 8.0 Hz, 1H), 7.29–7.26 (m, 2H), 7.26–7.24 (m, 2H), 7.16–7.14 (m, 2H), 7.13–7.09 (m, 3H), 6.89 (m, 1H), 5.18 (d, *J* = 3.0 Hz, 2H), 2.93–2.86 (m, 2H), 2.85–2.80 (m, 1H), 2.47 (m, 1H), 2.38–2.28 (m, 4H), 2.28–2.21 (m, 3H), 2.19 (d, *J* = 5.0 Hz, 1H), 2.12 (dd, *J* = 13.0, 5.0 Hz, 2H), 2.05–2.00 (m, 3H), 1.94 (m, 2H), 1.89–1.79 (m, 2H), 1.61–1.57 (m, 1H), 1.56 (s, 9H), 1.39 (d, *J* = 1.0 Hz, 3H), 1.31 (m, 2H), 1.06 (d, *J* = 2.0 Hz, 3H), 0.85 (d, *J* = 7.0 Hz, 3H);

<sup>13</sup>C NMR (126 MHz, CDCl<sub>3</sub>) δ 212.0, 209.2, 208.8, 174.0, 136.7, 135.5, 133.8, 133.0, 131.6, 130.9, 129.3, 128.4, 126.2, 125.8, 124.9, 123.3, 122.8, 121.7, 121.2, 119.5, 117.1, 116.9, 111.2, 105.8, 93.3, 66.7, 62.9, 56.9, 51.7, 49.0, 46.9, 45.7, 45.5, 45.0, 42.8, 38.6, 36.5, 36.0, 35.5, 35.3, 31.7, 31.3, 30.5, 27.6, 25.1, 21.9, 18.7, 11.9;

HRMS (EI-TOF) calcd for C<sub>52</sub>H<sub>57</sub>N<sub>3</sub>O<sub>5</sub> 803.4298, found 803.4300.

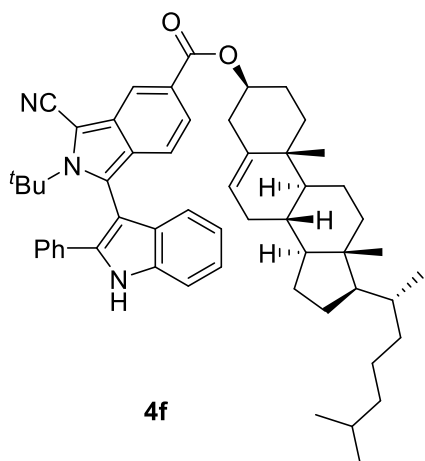

**(3*S*,8*S*,9*S*,10*R*,13*R*,14*S*,17*R*)-10,13-dimethyl-17-((*R*)-6-methylheptan-2-yl)-2,3,4,7,8,9,10,11,12,13,14,15,16,17-tetradecahydro-1*H*-cyclopenta[*a*]phenanthren-3-yl 2-(*tert*-butyl)-3-cyano-1-(2-phenyl-1*H*-indol-3-yl)-2*H*-isoindole-5-carboxylate (4f)**

Following the General Procedure **1**, and target product was purified by flash chromatography (PE/EA = 3/1) to give **4f** 80 mg (40% yield) as a white solid;

$^1\text{H}$  NMR (500 MHz,  $\text{CDCl}_3$ )  $\delta$  8.89 (d,  $J = 11.7$  Hz, 1H), 8.56 (br, 1H), 7.58–7.52 (m, 2H), 7.32–7.26 (m, 4H), 7.16 (m, 5H), 5.45 (d,  $J = 5.0$  Hz, 1H), 4.93 (m, 1H), 2.52 (t,  $J = 10.0$  Hz, 2H), 2.08–2.00 (m, 3H), 1.96 (m, 1H), 1.89–1.78 (m, 2H), 1.67 (d,  $J = 4.0$  Hz, 2H), 1.61 (s, 9H), 1.59–1.47 (m, 6H), 1.34 (s, 6H), 1.25–1.18 (m, 3H), 1.12 (s, 3H), 1.08–0.99 (m, 4H), 0.95 (d,  $J = 6.0$  Hz, 3H), 0.89 (dd,  $J = 7.0, 2.0$  Hz, 6H), 0.72 (s, 3H);

$^{13}\text{C}$  NMR (126 MHz,  $\text{CDCl}_3$ )  $\delta$  166.5, 139.8, 137.0, 135.5, 132.1, 131.6, 130.8, 129.2, 128.4, 128.3, 127.6, 126.3, 125.1, 123.4, 122.7, 122.2, 121.3, 121.3, 121.2, 119.4, 116.6, 111.3, 105.4, 95.0, 63.5, 56.7, 56.2, 50.3, 50.1, 42.4, 39.8, 39.5, 38.3, 37.1, 36.7, 36.2, 35.8, 32.0, 31.9, 31.3, 29.6, 28.3, 28.0, 28.0, 23.9, 22.6, 21.1, 19.4, 18.7, 11.9;

HRMS (EI-TOF) calcd for  $\text{C}_{55}\text{H}_{67}\text{N}_3\text{O}_2$  801.5233, found 801.5234.

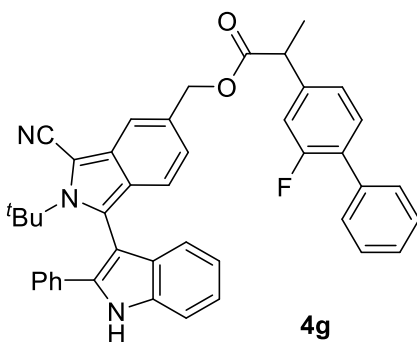

**(2-(*tert*-butyl)-3-cyano-1-(2-phenyl-1*H*-indol-3-yl)-2*H*-isoindol-5-yl)methyl 2-(2-fluoro-[1,1'-biphenyl]-4-yl)propanoate (**4g**)**

Following the General Procedure, and target product was purified by flash chromatography (PE/EA = 3/1) to give **4g** 73 mg (45% yield) as a pale yellow solid;

$^1\text{H}$  NMR (500 MHz,  $\text{CDCl}_3$ )  $\delta$  8.85 (br, 1H), 7.72 (d,  $J = 1.0$  Hz, 1H), 7.55 (t,  $J = 2.0$  Hz, 1H), 7.46–7.36 (m, 5H), 7.32–7.30 (m, 1H), 7.28–7.25 (m, 3H), 7.21–7.15 (m, 6H), 7.14–7.10 (m, 2H), 6.86–6.83 (m, 1H), 5.29 (dd,  $J = 13.0, 3.4$  Hz, 1H), 5.21 (dd,

$J = 13.0, 2.0$  Hz, 1H), 3.88 (q,  $J = 7.0$  Hz, 1H), 1.60 (d,  $J = 7.0$  Hz, 3H), 1.59 (s, 9H);

$^{13}\text{C}$  NMR (126 MHz,  $\text{CDCl}_3$ )  $\delta$  174.0, 159.7 (d,  $J = 250$  Hz), 141.7 (d,  $J = 8$  Hz), 136.7, 135.5, 135.5, 133.5, 133.0, 131.6, 130.9, 130.8, 129.2, 129.0 (d,  $J = 2$  Hz), 128.4, 128.3, 127.8 (d,  $J = 14$  Hz), 127.6, 126.2, 125.8, 125.0, 123.7, 123.6, 123.3, 122.5, 121.8, 121.2, 119.5, 116.7 (d,  $J = 38$  Hz), 115.3 (d,  $J = 24$  Hz), 111.2, 105.7, 93.3, 67.2, 63.0, 45.1, 31.3, 18.5;

HRMS (EI-TOF) calcd for  $\text{C}_{43}\text{H}_{36}\text{FN}_3\text{O}_2$  645.2792, found 645.2793.

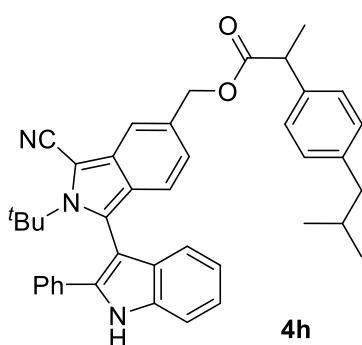

**(2-(*tert*-butyl)-3-cyano-1-(2-phenyl-1*H*-indol-3-yl)-2*H*-isoindol-5-yl)methyl 2-(4-isobutylphenyl)propanoate (4h)**

Following the General Procedure, and target product was purified by flash chromatography (PE/EA = 3/1) to give **4h** 87 mg (59% yield) as a white solid;

$^1\text{H}$  NMR (500 MHz,  $\text{CDCl}_3$ )  $\delta$  8.70 (br, 1H), 7.57 (d,  $J = 2.0$  Hz, 1H), 7.42 (d,  $J = 8.0$  Hz, 1H), 7.22–7.17 (m, 4H), 7.14 (d,  $J = 8.0$  Hz, 2H), 7.07 (m, 2H), 7.06–7.02 (m, 2H), 7.00 (dd,  $J = 8.0, 2.0$  Hz, 2H), 6.98–6.96 (m, 1H), 6.68 (m, 1H), 5.14 (dd,  $J = 13.0, 5.0$  Hz, 1H), 5.06 (dd,  $J = 13.0, 4.0$  Hz, 1H), 3.73–3.68 (m, 1H), 2.34 (d,  $J = 7.0$  Hz, 2H), 1.73 (m, 1H), 1.48 (d,  $J = 1.0$  Hz, 9H), 1.45 (d,  $J = 7.0$  Hz, 3H), 0.78 (d,  $J = 7.0$  Hz, 6H);

$^{13}\text{C}$  NMR (126 MHz,  $\text{CDCl}_3$ )  $\delta$  174.7, 140.6, 137.6, 136.7, 135.5, 133.8, 133.0, 131.6, 130.9, 129.4, 129.3, 128.3, 127.2, 126.2, 125.8, 124.9, 123.3, 122.4, 121.6, 121.2, 119.6, 117.1, 116.5, 111.2, 105.8, 93.3, 66.9, 62.9, 45.2, 45.0, 31.3, 30.2, 22.4, 18.5;



HRMS (EI-TOF) calcd for C<sub>41</sub>H<sub>41</sub>N<sub>3</sub>O<sub>2</sub> 607.3199, found 607.3121.

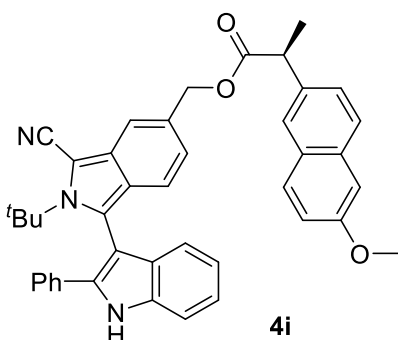

**(2-(*tert*-butyl)-3-cyano-1-(2-phenyl-1*H*-indol-3-yl)-2*H*-isoindol-5-yl)methyl  
(*S*)-2-(6-methoxynaphthalen-2-yl)propanoate (**4i**)**

Following the General Procedure, and target product was purified by flash chromatography (PE/EA = 2/1) to give **4i** 93 mg (59% yield) as a pale yellow solid;

<sup>1</sup>H NMR (500 MHz, CDCl<sub>3</sub>) δ 8.87 (br, 1H), 7.74–7.66 (m, 4H), 7.52 (d, *J* = 8.0 Hz, 1H), 7.48–7.44 (m, 1H), 7.29 (dd, *J* = 12.0, 5.0 Hz, 4H), 7.16 (m, 4H), 7.12–7.08 (m, 2H), 7.06 (d, *J* = 9.0 Hz, 1H), 6.80 (dd, *J* = 9.0, 4.0 Hz, 1H), 5.29–5.15 (m, 2H), 3.98 (q, *J* = 7.0 Hz, 1H), 3.91 (t, *J* = 1.0 Hz, 3H), 1.64 (d, *J* = 7.0 Hz, 3H), 1.59 (s, 9H);

<sup>13</sup>C NMR (126 MHz, CDCl<sub>3</sub>) δ 174.7, 157.6, 136.7, 135.6, 135.5, 133.7, 133.0, 131.6, 130.90, 129.3, 129.2, 128.9, 128.3, 127.3, 126.3, 126.2, 126.0, 125.8, 124.9, 123.3, 122.5, 121.7, 121.2, 119.5, 118.9, 117.1, 116.6, 111.2, 105.8, 105.7, 93.3, 67.0, 62.9, 55.3, 45.5, 31.3, 14.2;

HRMS (EI-TOF) calcd for C<sub>42</sub>H<sub>37</sub>N<sub>3</sub>O<sub>3</sub> 631.2835, found 631.2833.

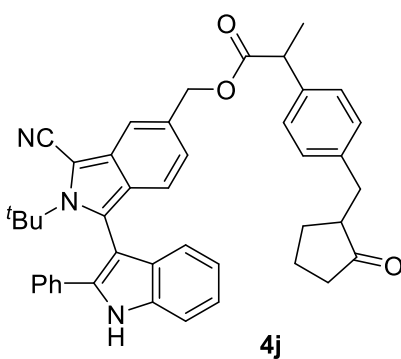

**(2-(*tert*-butyl)-3-cyano-1-(2-phenyl-1*H*-indol-3-yl)-2*H*-isoindol-5-yl)methyl 2-(4-((2-oxocyclopentyl)methyl)phenyl)propanoate (4j)**

Following the General Procedure, and target product was purified by flash chromatography (PE/EA = 1/1) to give **4j** 76 mg (47% yield) as a pale yellow oil;

<sup>1</sup>H NMR (500 MHz, CDCl<sub>3</sub>) δ 8.99–8.94 (br, 1H), 7.67 (s, 1H), 7.52 (d, *J* = 8.0 Hz, 1H), 7.31–7.29 (m, 2H), 7.28–7.23 (m, 4H), 7.20–7.16 (m, 2H), 7.16–7.08 (m, 4H), 7.07–7.03 (m, 1H), 6.78–6.71 (m, 1H), 5.20 (m, 2H), 3.81 (m, 1H), 3.11 (m, 1H), 2.47 (m, 1H), 2.36–2.27 (m, 2H), 2.12 (m, 1H), 2.05 (m, 1H), 1.91 (m, 1H), 1.67 (m, 1H), 1.59 (d, *J* = 1.9 Hz, 9H), 1.54 (d, *J* = 1.1 Hz, 4H);

<sup>13</sup>C NMR (126 MHz, CDCl<sub>3</sub>) δ 174.6, 138.9, 138.2, 136.7, 135.6, 133.7, 133.0, 131.7, 130.9, 129.2, 128.3, 127.6, 126.3, 125.8, 125.1, 123.3, 122.3, 121.7, 121.1, 119.5, 117.2, 116.4, 111.3, 105.6, 93.8, 66.9, 62.9, 51.0, 45.2, 38.2, 35.2, 31.3, 20.5, 18.5, 14.2;

HRMS (EI-TOF) calcd for C<sub>43</sub>H<sub>41</sub>N<sub>3</sub>O<sub>3</sub> 647.3148, found 647.3143.

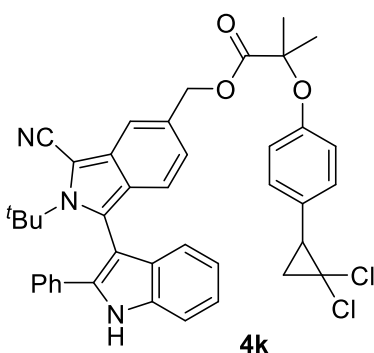

**(2-(*tert*-butyl)-3-cyano-1-(2-phenyl-1*H*-indol-3-yl)-2*H*-isoindol-5-yl)methyl 2-(4-(2,2-dichlorocyclopropyl)phenoxy)-2-methylpropanoate (4k)**

Following the General Procedure 1, and target product was purified by flash chromatography (PE/EA = 2/1) to give **4k** 65 mg (38% yield) as a pale yellow oil;

<sup>1</sup>H NMR (500 MHz, CDCl<sub>3</sub>) δ 8.76 (br, 1H), 7.65 (q, *J* = 2.0, 2.0 Hz, 1H), 7.50 (dd, *J* = 8.0, 1.0 Hz, 1H), 7.30–7.26 (m, 2H), 7.25 (d, *J* = 2.0 Hz, 1H), 7.17–7.12 (m, 4H), 7.04 (m, 3H), 6.81–6.76 (m, 2H), 6.76–6.73 (m, 1H), 5.26 (d, *J* = 2.0 Hz, 2H),

2.76 (m, 1H), 1.84 (m Hz, 1H), 1.69 (q,  $J = 8.0$  Hz, 1H), 1.63 (d,  $J = 2.0$  Hz, 6H), 1.57 (d,  $J = 1.0$  Hz, 9H);

$^{13}\text{C}$  NMR (126 MHz,  $\text{CDCl}_3$ )  $\delta$  174.12 154.9, 154.9, 136.7, 135.5, 133.0, 132.9, 131.6, 130.9, 129.7, 129.3, 128.4, 128.5, 126.2, 125.8, 124.9, 123.4, 122.7, 121.7, 121.3, 119.5, 118.7, 117.2, 117.0, 111.2, 105.8, 93.4, 67.7, 63.0, 60.9, 34.8, 31.3, 25.8, 25.5, 25.4.

HRMS (EI-TOF) calcd for  $\text{C}_{41}\text{H}_{37}\text{Cl}_2\text{N}_3\text{O}_3$  689.2212, found 689.2211.

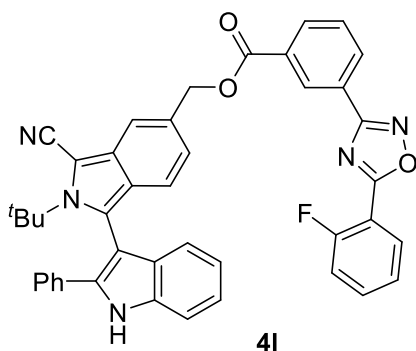

**(2-(*tert*-butyl)-3-cyano-1-(2-phenyl-1*H*-indol-3-yl)-2*H*-isoindol-5-yl)methyl 3-(5-(2-fluorophenyl)-1,2,4-oxadiazol-3-yl)benzoate (41)**

Following the General Procedure, and target product was purified by flash chromatography (PE/EA = 1/1) to give **41** 70 mg (41% yield) as a pale yellow solid;

$^1\text{H}$  NMR (500 MHz,  $\text{CDCl}_3$ )  $\delta$  8.80 (br, 1H), 8.28 (m, 1H), 8.19–8.12 (m, 2H), 7.75 (t,  $J = 1.0$  Hz, 1H), 7.50 (m, 2H), 7.42 (d,  $J = 8.0$  Hz, 1H), 7.25 (m, 1H), 7.21–7.18 (m, 2H), 7.17–7.12 (m, 4H), 7.11–7.05 (m, 4H), 7.02 (m, 1H), 6.95 (dd,  $J = 9.0, 1.0$  Hz, 1H), 5.41 (s, 2H), 1.48 (s, 9H);

$^{13}\text{C}$  NMR (126 MHz,  $\text{CDCl}_3$ )  $\delta$  173.1, 168.1, 165.9, 161.1 (d,  $J = 260$  Hz), 136.8, 135.5, 134.7 (d,  $J = 8$  Hz), 133.6, 133.1, 132.4, 131.9, 131.6, 131.1, 131.0, 130.9, 129.2, 129.1, 128.9, 128.3, 127.3, 126.3, 126.0, 125.1, 124.8 (d,  $J = 4$  Hz), 123.2 (d,  $J = 40$  Hz), 121.9, 121.2, 119.5, 117.4, 117.3, 117.1 (d,  $J = 5$  Hz), 112.8 (d,  $J = 12$  Hz), 111.2, 105.7, 93.4, 67.6, 63.0, 31.3;

HRMS (EI-TOF) calcd for  $\text{C}_{43}\text{H}_{32}\text{FN}_5\text{O}_3$  685.2489, found 685.2488.

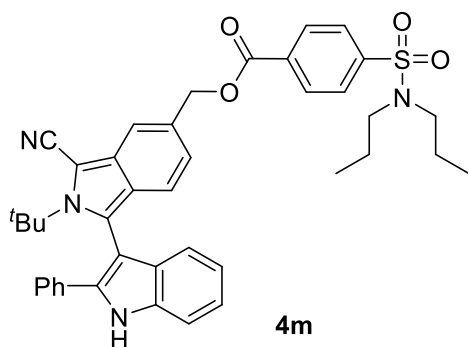

**(2-(*tert*-butyl)-3-cyano-1-(2-phenyl-1*H*-indol-3-yl)-2*H*-isoindol-5-yl)methyl  
4-(*N,N*-dipropylsulfamoyl)benzoate (4m)**

Following the General Procedure, and target product was purified by flash chromatography (PE/EA = 1/1) to give **4m** 70 mg (46% yield) as a white solid;

<sup>1</sup>H NMR (500 MHz, CDCl<sub>3</sub>) δ 8.91 (br, 1H), 8.22 (d, *J* = 8.0 Hz, 2H), 7.89 (d, *J* = 8.0 Hz, 2H), 7.82 (s, 1H), 7.54 (d, *J* = 8.0 Hz, 1H), 7.28 (t, *J* = 7.0 Hz, 4H), 7.21–7.12 (m, 5H), 7.01 (d, *J* = 9.0 Hz, 1H), 5.48 (s, 2H), 3.14–3.08 (m, 4H), 1.59 (s, 9H), 1.55 (dd, *J* = 15.0, 8.0 Hz, 4H), 0.89 (t, *J* = 7.0 Hz, 6H);

<sup>13</sup>C NMR (126 MHz, CDCl<sub>3</sub>) δ 165.2, 144.3, 136.8, 135.5, 133.5, 133.2, 133.0, 131.6, 130.9, 130.4, 129.2, 128.3, 127.0, 126.2, 125.9, 125.2, 123.3, 122.8, 122.0, 121.2, 119.5, 117.3, 117.1, 111.3, 105.6, 93.4, 67.9, 50.0, 31.3, 22.0, 11.2;

HRMS (EI-TOF) calcd for C<sub>41</sub>H<sub>42</sub>N<sub>4</sub>O<sub>4</sub>S 686.2927, found 686.2925.

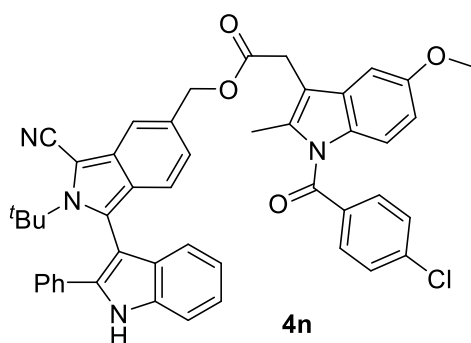

**(2-(*tert*-butyl)-3-cyano-1-(2-phenyl-1*H*-indol-3-yl)-2*H*-isoindol-5-yl)methyl  
2-(1-(4-chlorobenzoyl)-5-methoxy-2-methyl-1*H*-indol-3-yl)acetate (4n)**

Following the General Procedure, and target product was purified by flash

chromatography (PE/EA = 3/1) to give **4n** 71 mg (31% yield) as a white solid;

$^1\text{H}$  NMR (500 MHz,  $\text{CDCl}_3$ )  $\delta$  8.86 (br, 1H), 7.73 (s, 1H), 7.65 (d,  $J = 8.0$  Hz, 2H), 7.51 (d,  $J = 8.0$  Hz, 1H), 7.44 (d,  $J = 8.0$  Hz, 2H), 7.32–7.27 (m, 4H), 7.16 (m, 4H), 7.11 (d,  $J = 9.0$  Hz, 1H), 6.98 (d,  $J = 3.0$  Hz, 1H), 6.91–6.85 (m, 2H), 6.67 (dd,  $J = 9.0, 3.0$  Hz, 1H), 5.25 (s, 2H), 3.77 (s, 2H), 3.74 (s, 3H), 2.40 (s, 3H), 1.59 (s, 9H);

$^{13}\text{C}$  NMR (126 MHz,  $\text{CDCl}_3$ )  $\delta$  170.8, 168.3, 156.1, 139.2, 136.7, 136.0, 135.5, 133.9, 133.4, 133.0, 131.6, 131.2, 130.9, 130.8, 130.6, 129.2, 129.1, 128.4, 126.2, 125.8, 125.0, 123.4, 122.6, 121.8, 121.2, 119.5, 117.0, 116.9, 115.0, 112.5, 112.0, 111.2, 105.7, 101.1, 93.3, 67.3, 63.0, 55.6, 31.3, 30.4, 13.4;

HRMS (EI-TOF) calcd for  $\text{C}_{47}\text{H}_{39}\text{N}_4\text{O}_4$  758.2660, found 758.2665.

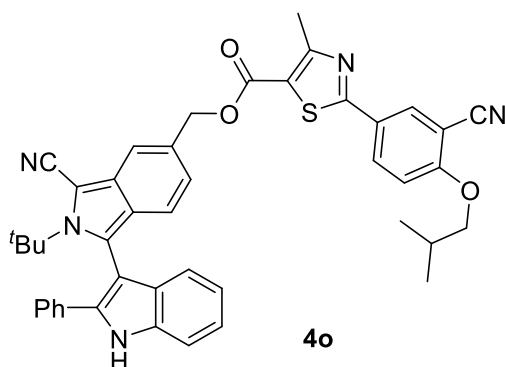

**(2-(tert-butyl)-3-cyano-1-(2-phenyl-1H-indol-3-yl)-2H-isoindol-5-yl)methyl 2-(3-cyano-4-isobutoxyphenyl)-4-methylthiazole-5-carboxylate (4o)**

Following the General Procedure, and target product was purified by flash chromatography (PE/EA = 1/1) to give **4o** 61 mg (35% yield) as a pale yellow solid;

$^1\text{H}$  NMR (500 MHz,  $\text{CDCl}_3$ )  $\delta$  8.90 (br, 1H), 8.09 (d,  $J = 2.0$  Hz, 1H), 7.99 (dd,  $J = 9.0, 2.0$  Hz, 1H), 7.69 (s, 1H), 7.43 (d,  $J = 8.0$  Hz, 1H), 7.17 (d,  $J = 7.0$  Hz, 4H), 7.11–7.08 (m, 2H), 7.07–7.01 (m, 3H), 6.94–6.88 (m, 2H), 5.32 (s, 2H), 3.81 (d,  $J = 6.0$  Hz, 2H), 2.70 (s, 3H), 2.11 (m, 1H), 1.49 (s, 9H), 1.00 (d,  $J = 7.0$  Hz, 6H);

$^{13}\text{C}$  NMR (126 MHz,  $\text{CDCl}_3$ )  $\delta$  167.5, 162.5, 161.9, 161.7, 136.8, 135.5, 133.3, 133.0, 132.7, 132.1, 131.6, 130.9, 129.2, 128.3, 126.2, 126.0, 125.9, 125.1, 123.3, 122.7, 122.0, 121.5, 121.2, 119.5, 117.1, 117.1, 115.4, 112.6, 111.7, 105.6, 103.0, 93.4,

67.5, 63.0, 31.3, 28.2, 19.1, 17.6;

HRMS (EI-TOF) calcd for C<sub>44</sub>H<sub>39</sub>N<sub>5</sub>O<sub>3</sub>S 717.2774, found 717.2775.

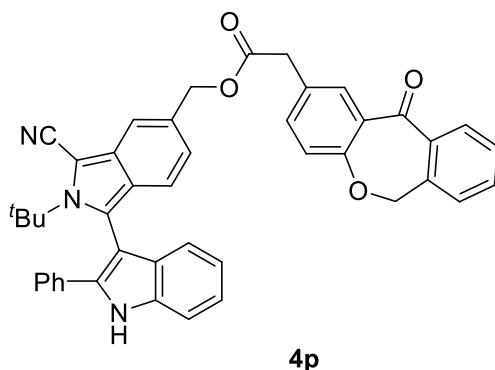

**(2-(tert-butyl)-3-cyano-1-(2-phenyl-1H-indol-3-yl)-2H-isoindol-5-yl)methyl  
2-(11-oxo-6,11-dihydrodibenzo[b,e]oxepin-2-yl)acetate (4p)**

Following the General Procedure, and target product was purified by flash chromatography (PE/EA = 1/1) to give **4p** 84 mg (50% yield) as a pale yellow oil;

<sup>1</sup>H NMR (500 MHz, CDCl<sub>3</sub>) δ 8.78 (br, 1H), 8.06 (d, *J* = 2.0 Hz, 1H), 7.79 (dd, *J* = 8.0, 1.0 Hz, 1H), 7.61 (t, *J* = 1.0 Hz, 1H), 7.48–7.45 (m, 1H), 7.42–7.40 (m, 1H), 7.38–7.35 (m, 2H), 7.27 (dd, *J* = 8.0, 1.0 Hz, 1H), 7.20–7.18 (m, 1H), 7.18–7.15 (m, 3H), 7.09–7.05 (m, 3H), 7.04–7.01 (m, 2H), 6.95 (d, *J* = 9.0 Hz, 1H), 6.80 (dd, *J* = 9.0, 1.0 Hz, 1H), 5.14 (s, 2H), 5.08 (s, 2H), 3.64 (s, 2H), 1.48 (s, 9H);

<sup>13</sup>C NMR (126 MHz, CDCl<sub>3</sub>) δ 190.9, 171.4, 140.5, 136.8, 136.5, 135.6, 135.5, 133.4, 133.0, 132.8, 132.6, 131.6, 131.0, 129.5, 129.2, 128.3, 127.8, 127.7, 126.2, 125.9, 125.2, 125.0, 123.3, 122.7, 121.8, 121.2, 121.1, 119.5, 117.1, 117.0, 111.2, 105.7, 93.3, 73.6, 67.3, 63.0, 40.2, 31.3;

HRMS (EI-TOF) calcd for C<sub>44</sub>H<sub>35</sub>N<sub>3</sub>O<sub>4</sub> 669.2628, found 669.2629.

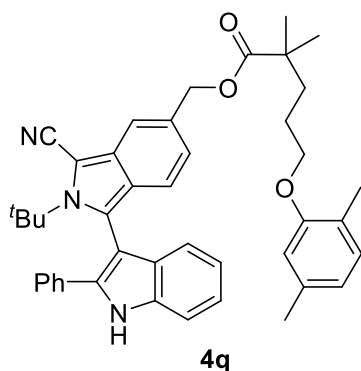

**(2-(*tert*-butyl)-3-cyano-1-(2-phenyl-1*H*-indol-3-yl)-2*H*-isoindol-5-yl)methyl 5-(2,5-dimethylphenoxy)-2,2-dimethylpentanoate (4q)**

Following the General Procedure, and target product was purified by flash chromatography (PE/EA = 2/1) to give **4q** 83 mg (51% yield) as a pale yellow oil;

$^1\text{H}$  NMR (500 MHz,  $\text{CDCl}_3$ )  $\delta$  8.51 (br, 1H), 7.55 (s, 1H), 7.36 (d,  $J = 8.0$  Hz, 1H), 7.17–7.12 (m, 4H), 7.02 (d,  $J = 8.0$  Hz, 3H), 6.97 (dd,  $J = 13.0, 8.0$  Hz, 2H), 6.81 (s, 1H), 6.74 (d,  $J = 9.0$  Hz, 1H), 6.49 (d,  $J = 8.0$  Hz, 1H), 6.45 (s, 1H), 5.09–5.01 (m, 2H), 3.79–3.72 (m, 2H), 2.14 (s, 3H), 1.98 (s, 3H), 1.46 (s, 4H), 1.43 (s, 9H), 1.13 (s, 6H);

$^{13}\text{C}$  NMR (126 MHz,  $\text{CDCl}_3$ )  $\delta$  177.7, 157.0, 136.7, 136.4, 135.4, 134.1, 133.0, 131.6, 130.9, 130.2, 129.3, 128.4, 126.2, 125.8, 124.8, 123.6, 123.4, 122.4, 121.6, 121.2, 120.6, 119.6, 117.0, 116.4, 112.0, 111.1, 105.9, 93.3, 67.9, 66.6, 62.9, 42.3, 37.2, 31.3, 25.2, 25.1, 21.4, 15.8;

HRMS (EI-TOF) calcd for  $\text{C}_{43}\text{H}_{45}\text{N}_3\text{O}_3$  651.3461, found 651.3460.

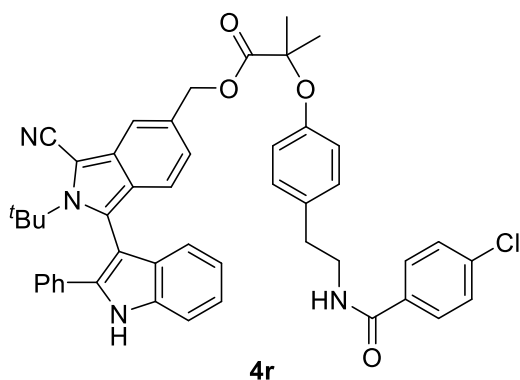

**(2-(*tert*-butyl)-3-cyano-1-(2-phenyl-1*H*-indol-3-yl)-2*H*-isoindol-5-yl)methyl  
2-(4-(2-(4-chlorobenzamido)ethyl)phenoxy)-2-methylpropanoate (4r)**

Following the General Procedure, and target product was purified by flash chromatography (PE/EA = 1/1) to give **4r** 88 mg (46% yield) as a white solid;

<sup>1</sup>H NMR (500 MHz, CDCl<sub>3</sub>) δ 8.51 (br, 1H), 7.55 (s, 1H), 7.36 (d, *J* = 8.0 Hz, 1H), 7.17–7.12 (m, 4H), 7.02 (d, *J* = 8.0 Hz, 3H), 6.97 (dd, *J* = 13.0, 8.0 Hz, 2H), 6.81 (s, 1H), 6.74 (d, *J* = 9.0 Hz, 1H), 6.49 (d, *J* = 8.0 Hz, 1H), 6.45 (br, 1H), 5.09–5.01 (m, 2H), 3.79–3.72 (m, 2H), 2.14 (s, 3H), 1.98 (s, 3H), 1.46 (s, 4H), 1.43 (s, 9H), 1.13 (s, 6H);

<sup>13</sup>C NMR (126 MHz, CDCl<sub>3</sub>) δ 174.3, 166.5, 154.1, 137.6, 136.8, 135.6, 133.2, 133.0, 132.9, 132.4, 131.6, 130.8, 129.6, 129.2, 128.8, 128.3, 126.2, 125.9, 125.2, 123.3, 122.6, 121.7, 121.2, 119.4, 119.3, 117.1, 116.9, 111.3, 105.6, 93.2, 67.6, 63.0, 41.1, 34.5, 31.3, 25.5, 25.4;

HRMS (EI-TOF) calcd for C<sub>47</sub>H<sub>43</sub>ClN<sub>4</sub>O<sub>4</sub> 762.2973, found 762.2977.

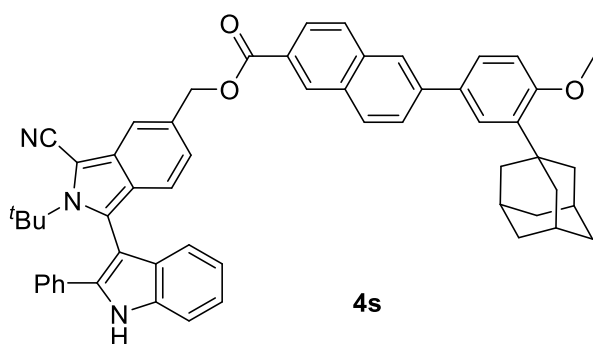

**(2-(*tert*-butyl)-3-cyano-1-(2-phenyl-1*H*-indol-3-yl)-2*H*-isoindol-5-yl)methyl  
6-(3-((3*r*,5*r*,7*r*)-adamantan-1-yl)-4-methoxyphenyl)-2-naphthoate (4s)**

Following the General Procedure 1, and target product was purified by flash chromatography (PE/EA = 2/1) to give **4s** 52 mg (51% yield) as a pale yellow solid;

<sup>1</sup>H NMR (500 MHz, CDCl<sub>3</sub>) δ 8.74 (br, 1H), 8.69 (s, 1H), 8.14 (dd, *J* = 9.0, 2.0 Hz, 1H), 8.05 – 8.03 (m, 1H), 8.01 (d, *J* = 9.0 Hz, 1H), 7.94 (d, *J* = 9.0 Hz, 1H), 7.90 (t, *J* = 1.0 Hz, 1H), 7.81 (dd, *J* = 9.0, 2.0 Hz, 1H), 7.63 (d, *J* = 2.0 Hz, 1H), 7.57 (dd, *J*



= 8.0, 2.0 Hz, 1H), 7.53 (d,  $J = 8.0$  Hz, 1H), 7.33 – 7.28 (m, 4H), 7.22–7.18 (m, 4H), 7.15 (m, 1H), 7.10 (dd,  $J = 9.0, 1.0$  Hz, 1H), 7.02 (d,  $J = 9.0$  Hz, 1H), 5.54 (s, 2H), 3.93 (s, 3H), 2.22 (d,  $J = 3.0$  Hz, 6H), 2.13 (s, 3H), 1.84 (d,  $J = 3.0$  Hz, 6H), 1.61 (s, 9H);

$^{13}\text{C}$  NMR (126 MHz,  $\text{CDCl}_3$ )  $\delta$  166.8, 158.9, 141.4, 139.0, 136.7, 136.1, 135.5, 133.9, 133.1, 132.6, 131.6, 131.3, 131.1, 130.9, 129.8, 129.3, 128.4, 128.3, 126.9, 126.5, 126.2, 126.0, 125.9, 125.8, 125.7, 124.9, 124.7, 123.4, 123.0, 121.8, 121.3, 119.6, 117.2, 117.1, 112.1, 111.2, 105.8, 93.4, 67.4, 63.0, 55.2, 40.6, 37.2, 37.2, 31.3, 29.1;

HRMS (EI-TOF) calcd for  $\text{C}_{56}\text{H}_{51}\text{N}_3\text{O}_3$  813.3930, found 813.3933.

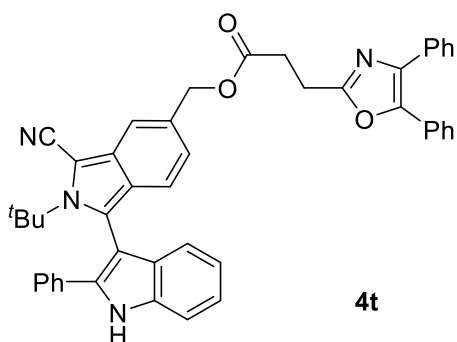

**(2-(*tert*-butyl)-3-cyano-1-(2-phenyl-1*H*-indol-3-yl)-2*H*-isoindol-5-yl)methyl 3-(4,5-diphenyloxazol-2-yl)propanoate (4t)**

Following the General Procedure 1, and target product was purified by flash chromatography (PE/EA = 1/1) to give **4t** 76 mg (44% yield) as a pale yellow oil;

$^1\text{H}$  NMR (500 MHz,  $\text{CDCl}_3$ )  $\delta$  8.89 (br, 1H), 7.71 (t,  $J = 1.0$  Hz, 1H), 7.62–7.59 (m, 2H), 7.56–7.52 (m, 2H), 7.50 (dd,  $J = 8.0, 1.0$  Hz, 1H), 7.33–7.26 (m, 7H), 7.25–7.22 (m, 3H), 7.16–7.13 (m, 2H), 7.11–7.08 (m, 2H), 7.03 (dd,  $J = 9.0, 1.0$  Hz, 1H), 6.87 (dd,  $J = 9.0, 1.0$  Hz, 1H), 5.24 (s, 2H), 3.21 (t,  $J = 8.0$  Hz, 2H), 2.98 (t,  $J = 8.0$  Hz, 2H), 1.56 (s, 9H);

$^{13}\text{C}$  NMR (126 MHz,  $\text{CDCl}_3$ )  $\delta$  172.0, 161.7, 145.5, 136.8, 135.5, 135.1, 133.5, 133.0, 132.4, 131.6, 130.9, 129.2, 129.0, 128.6, 128.5, 128.4, 128.3, 128.0, 127.9,

126.5, 126.3, 125.9, 125.0, 123.3, 122.7, 121.8, 121.2, 119.6, 117.1, 117.0, 111.2,  
105.7, 93.3, 67.2, 63.0, 31.3, 31.2, 23.6;

HRMS (EI-TOF) calcd for  $C_{46}H_{38}N_4O_3$  694.2944, found 694.2940.

## 9. The $^1\text{H}$ and $^{13}\text{C}$ NMR spectra of compounds

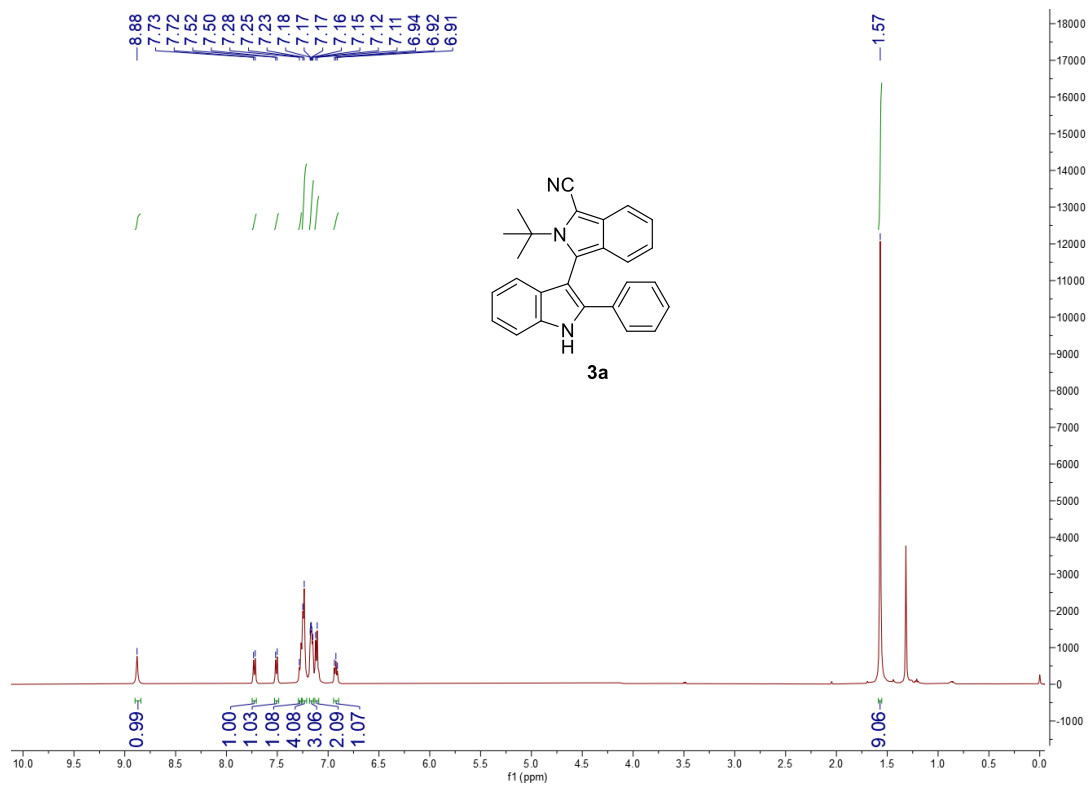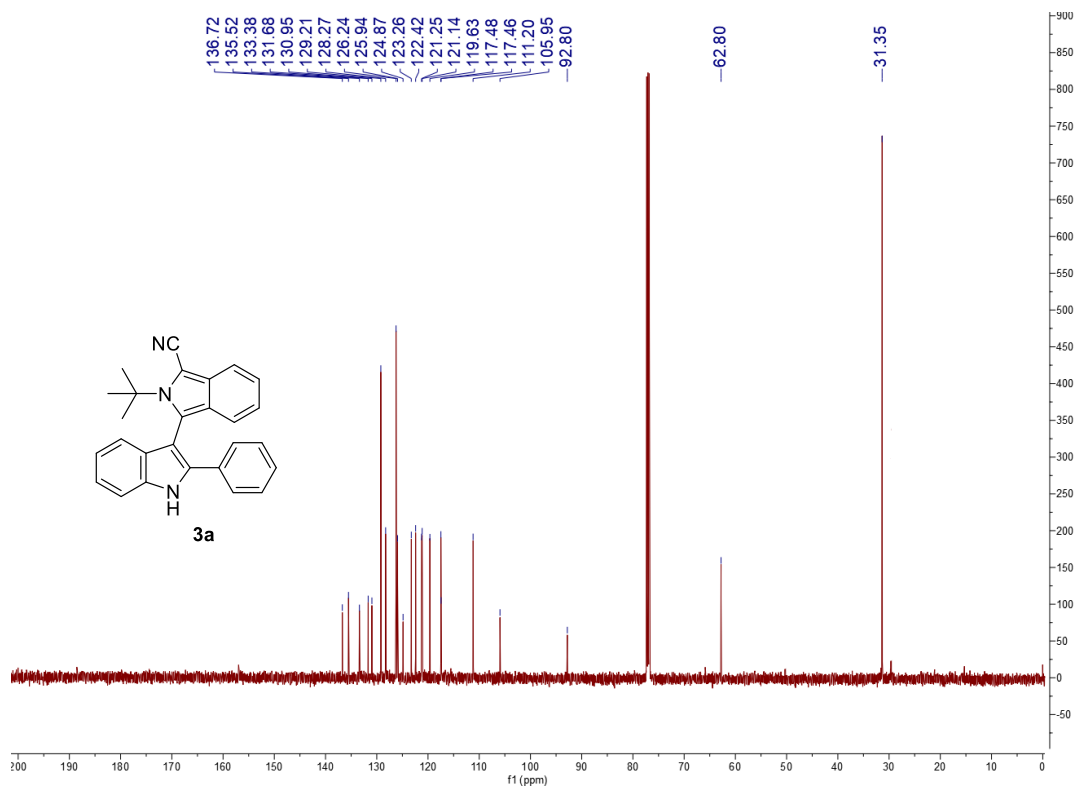

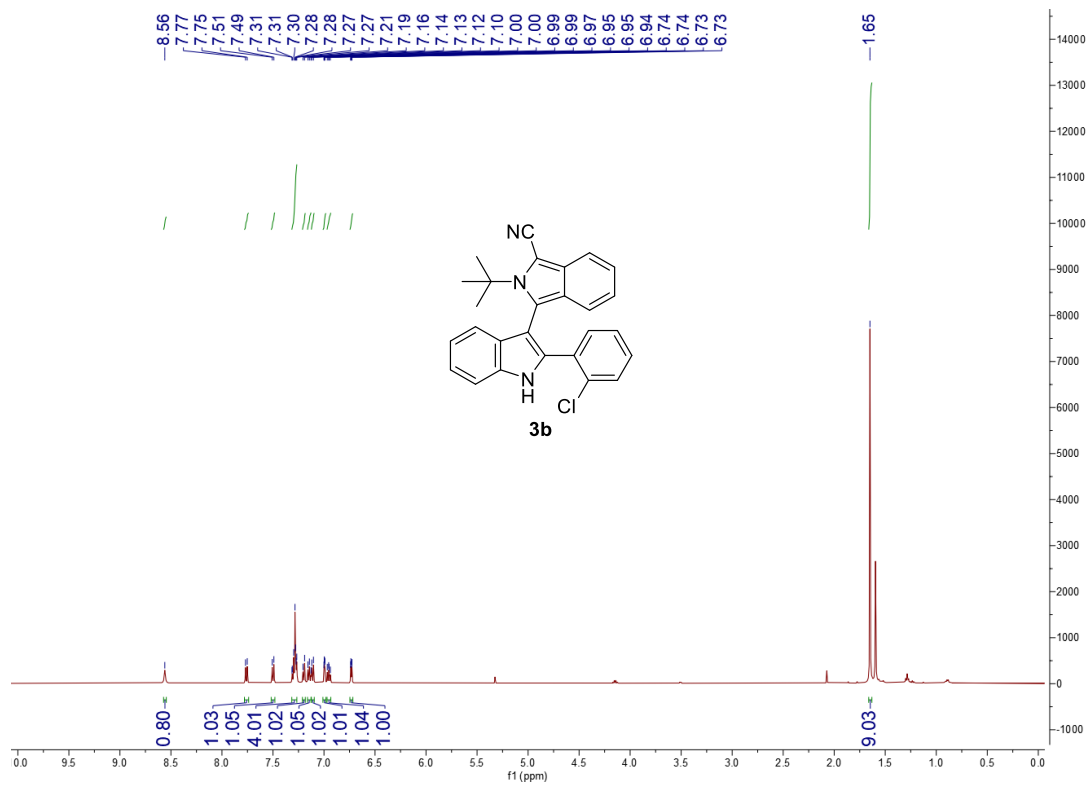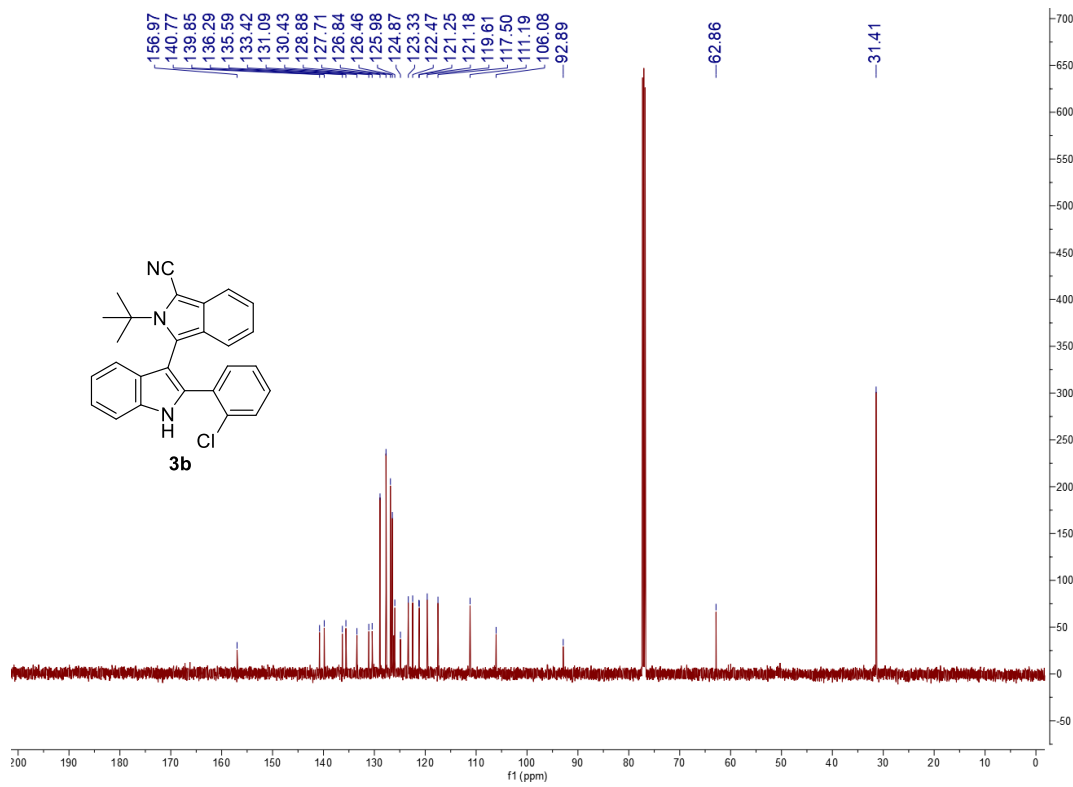

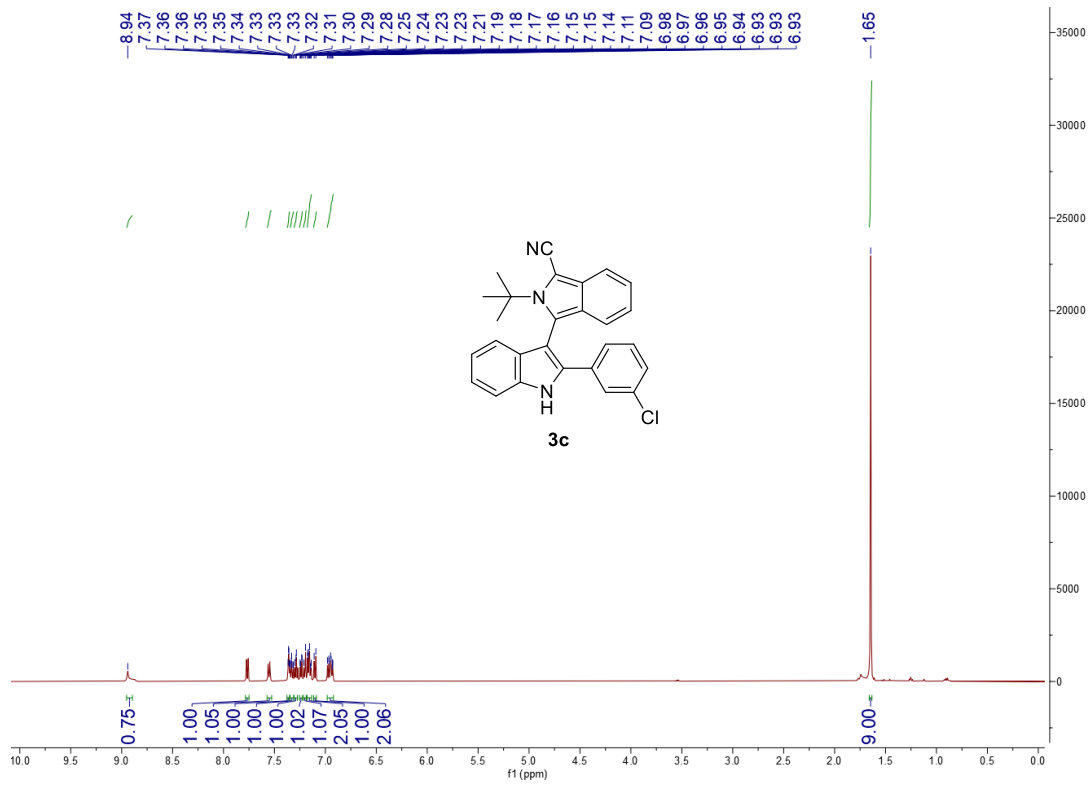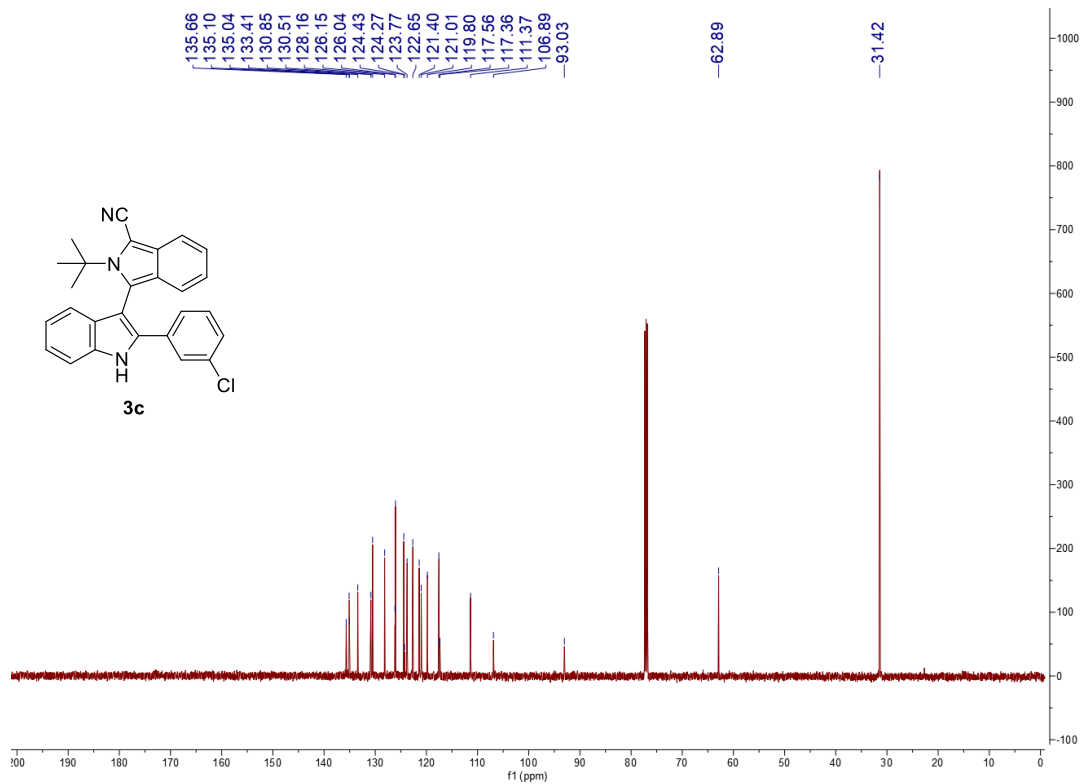

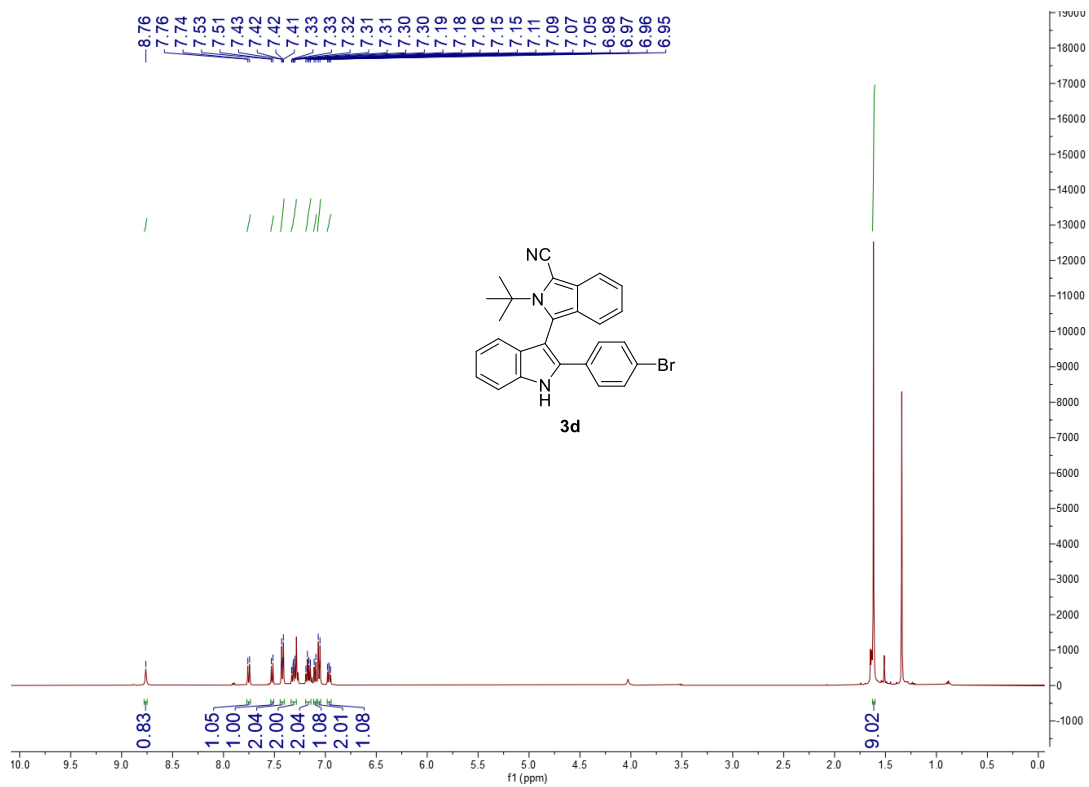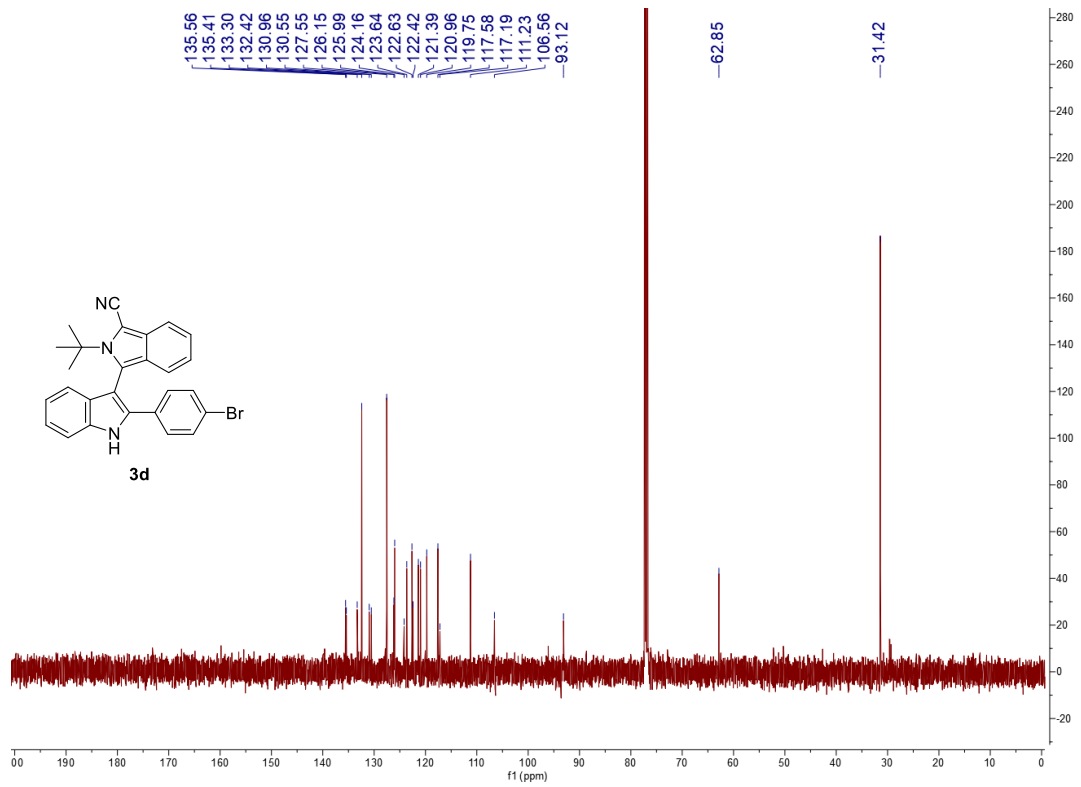

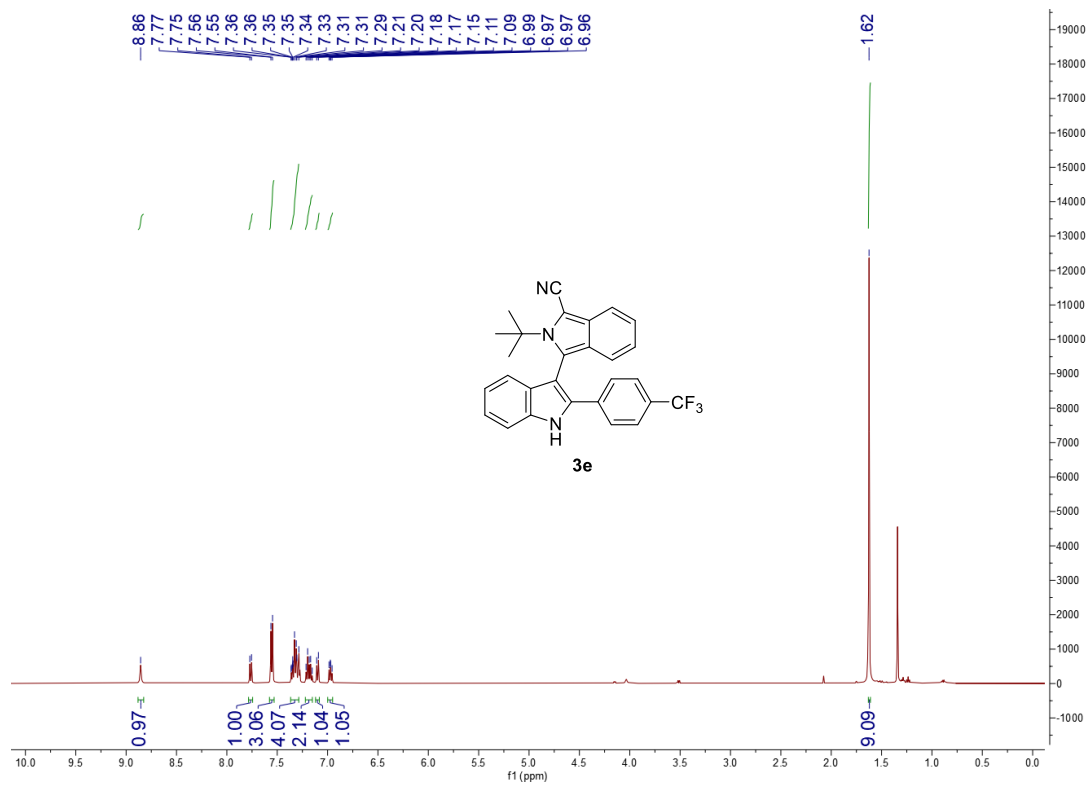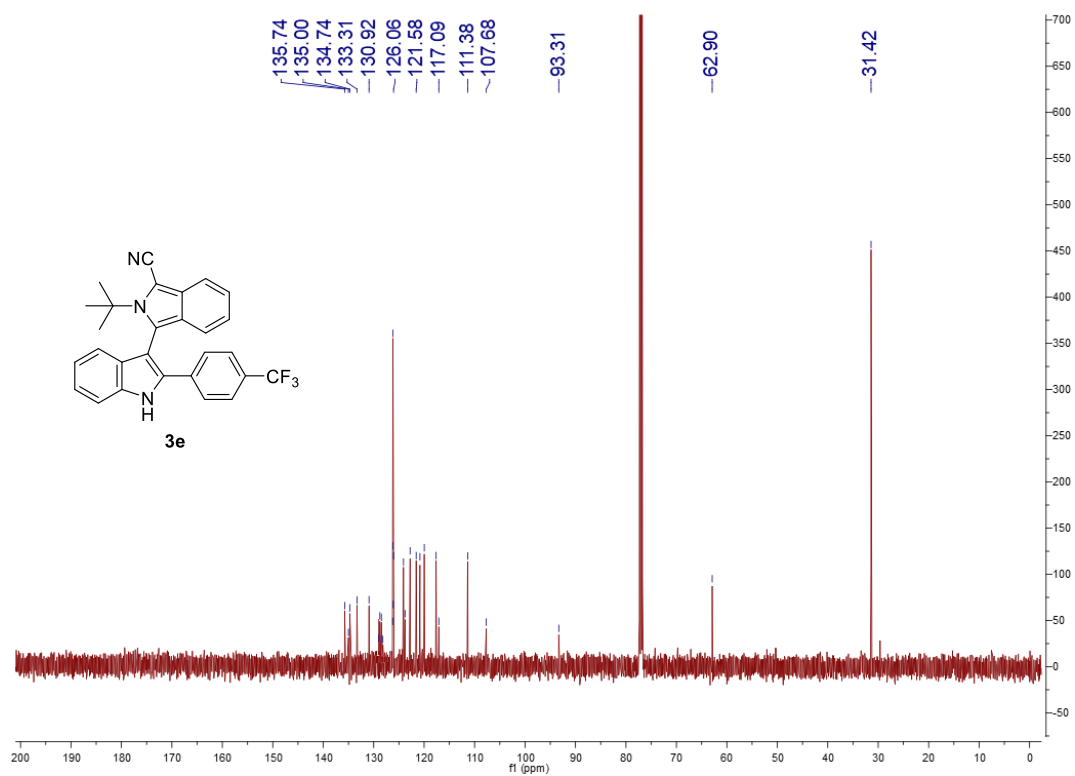

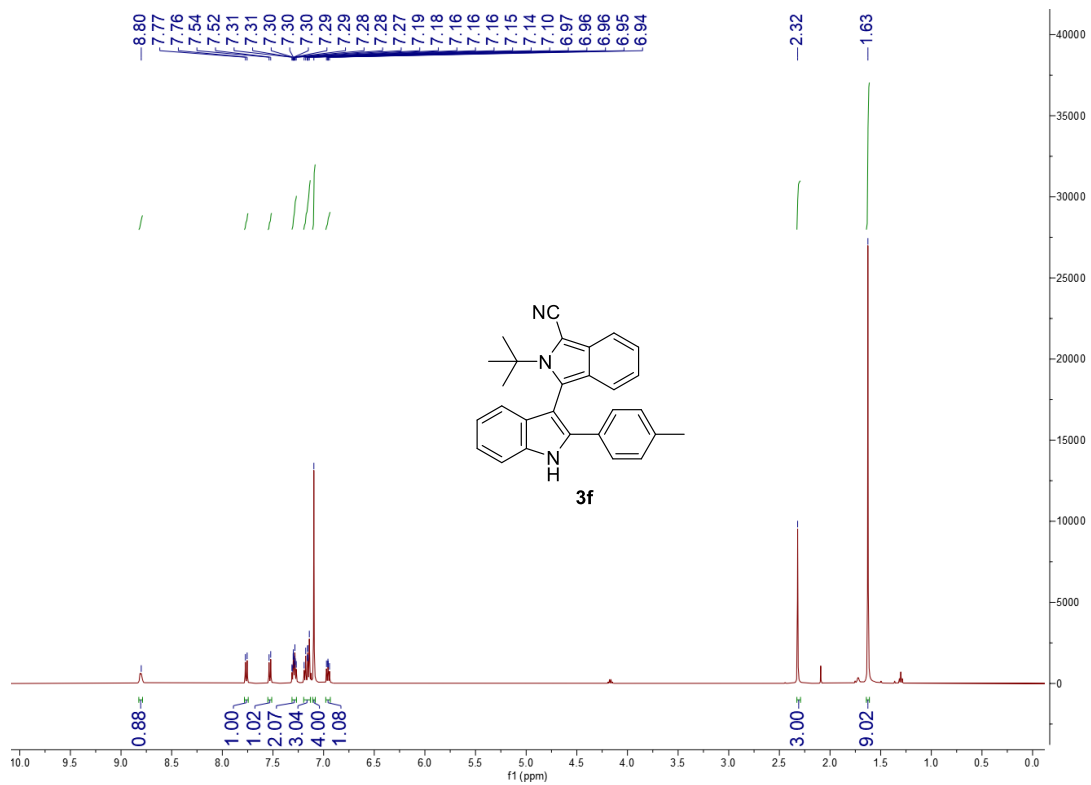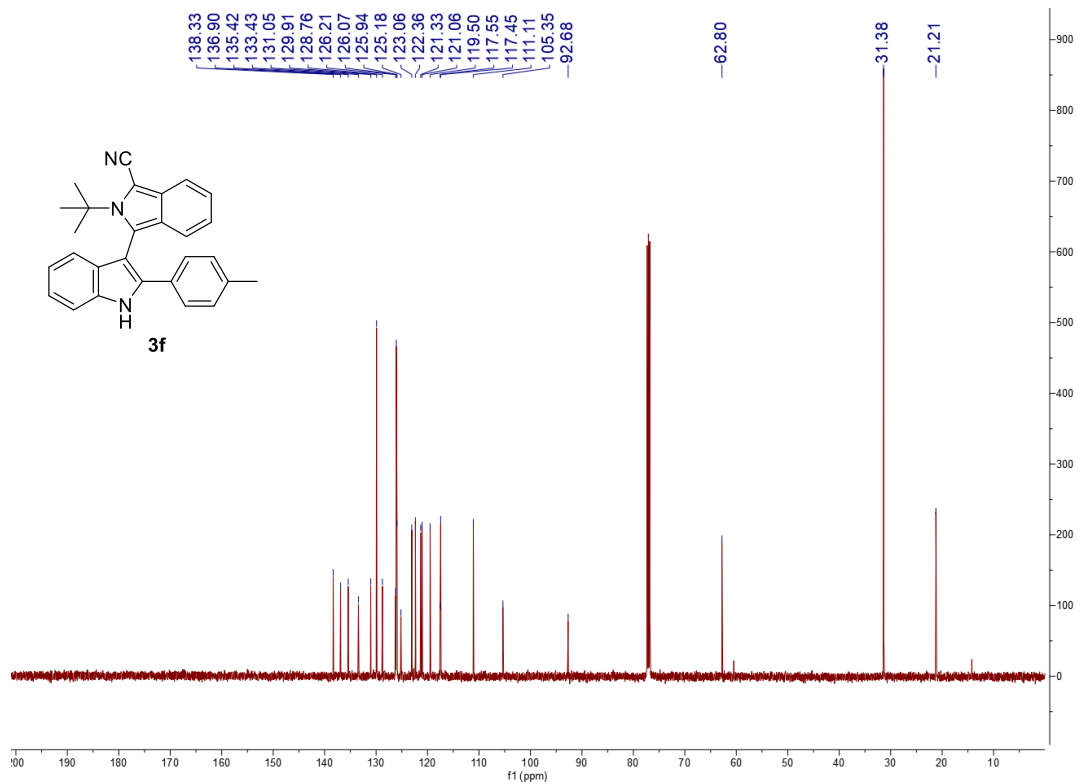



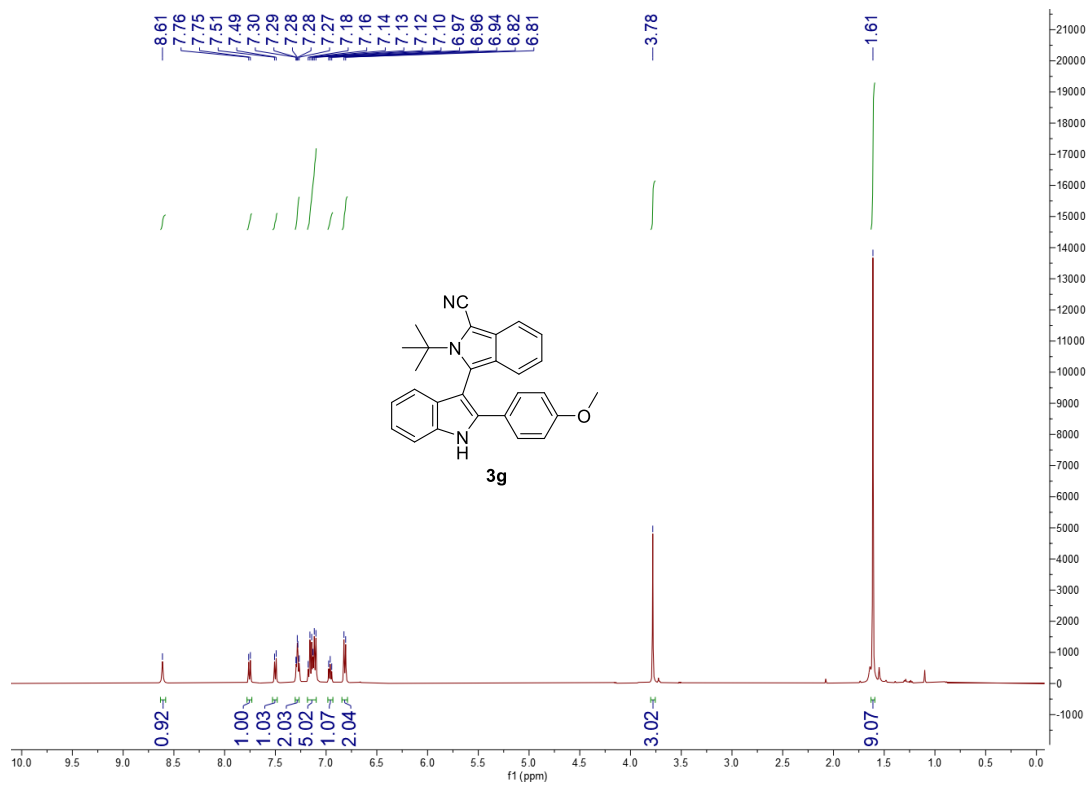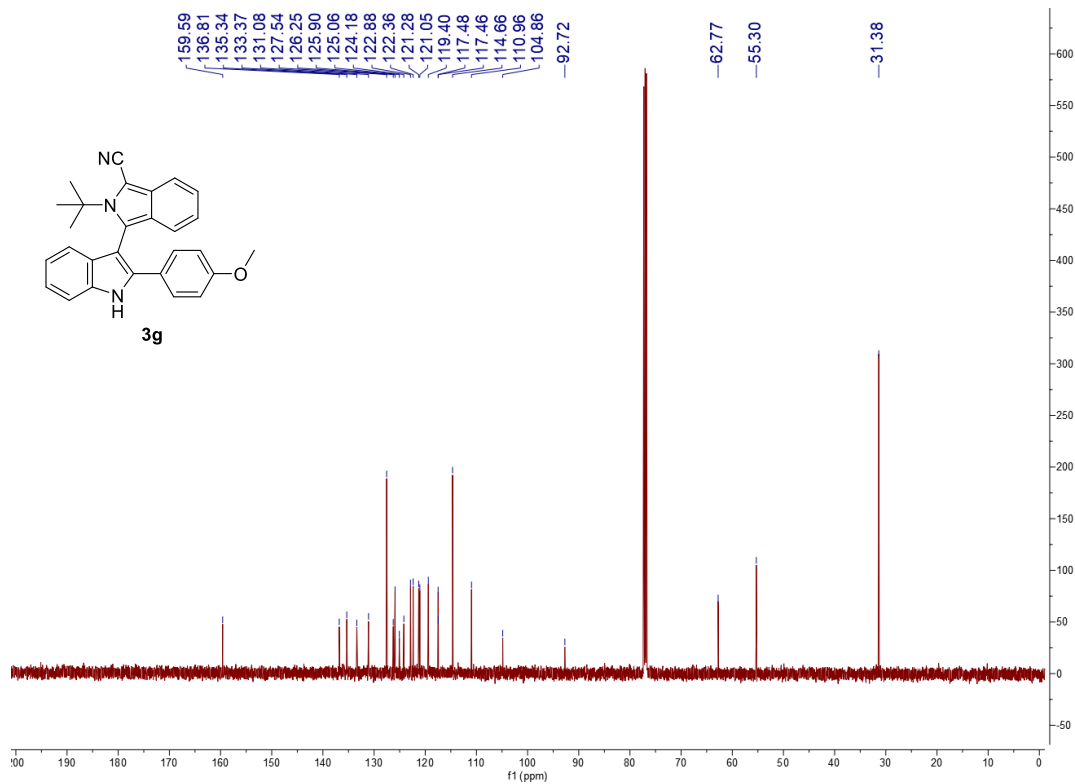

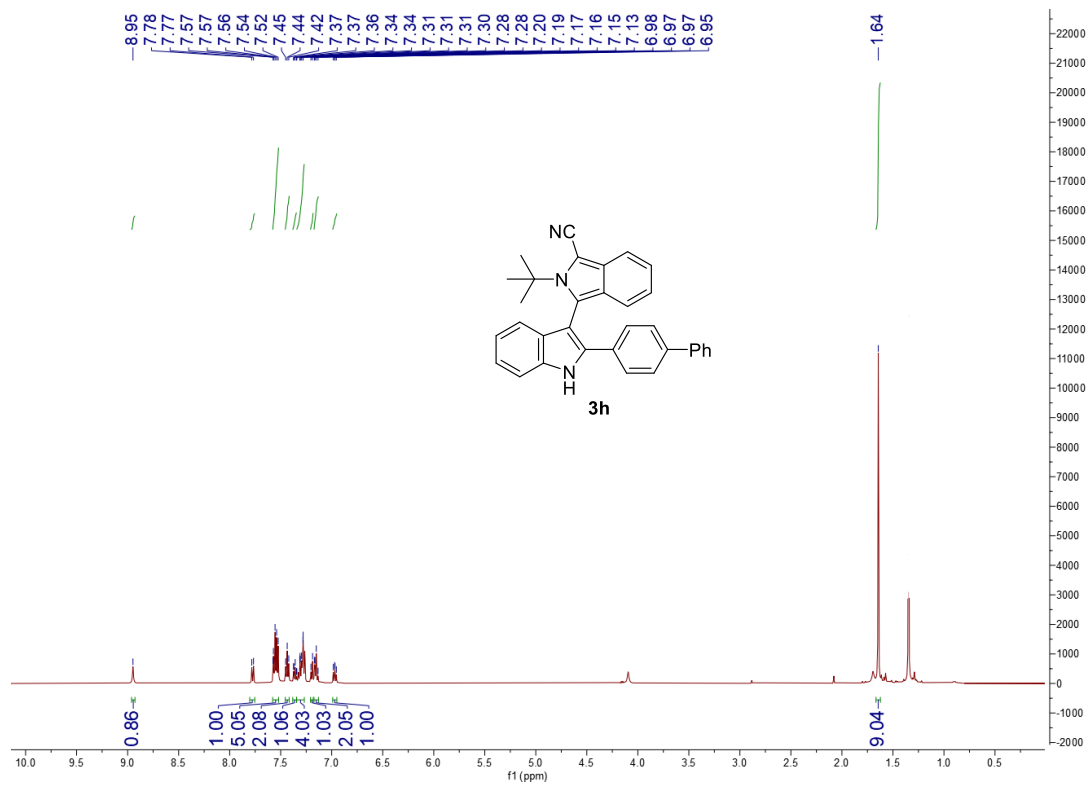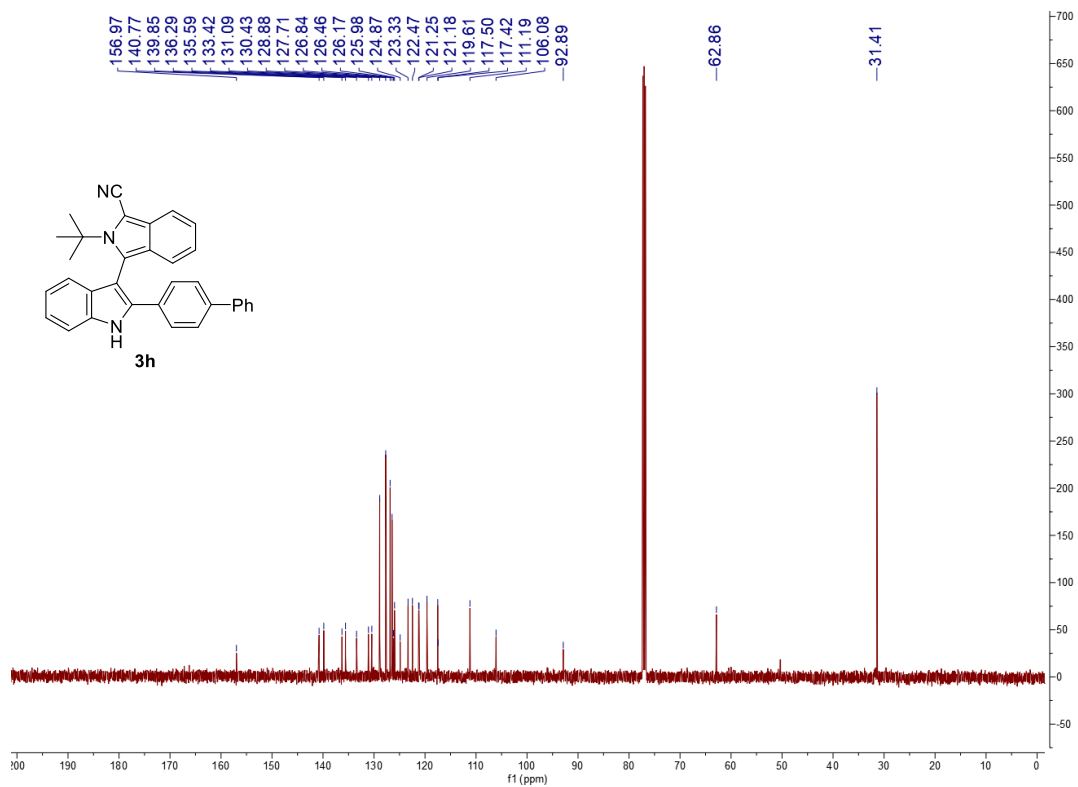

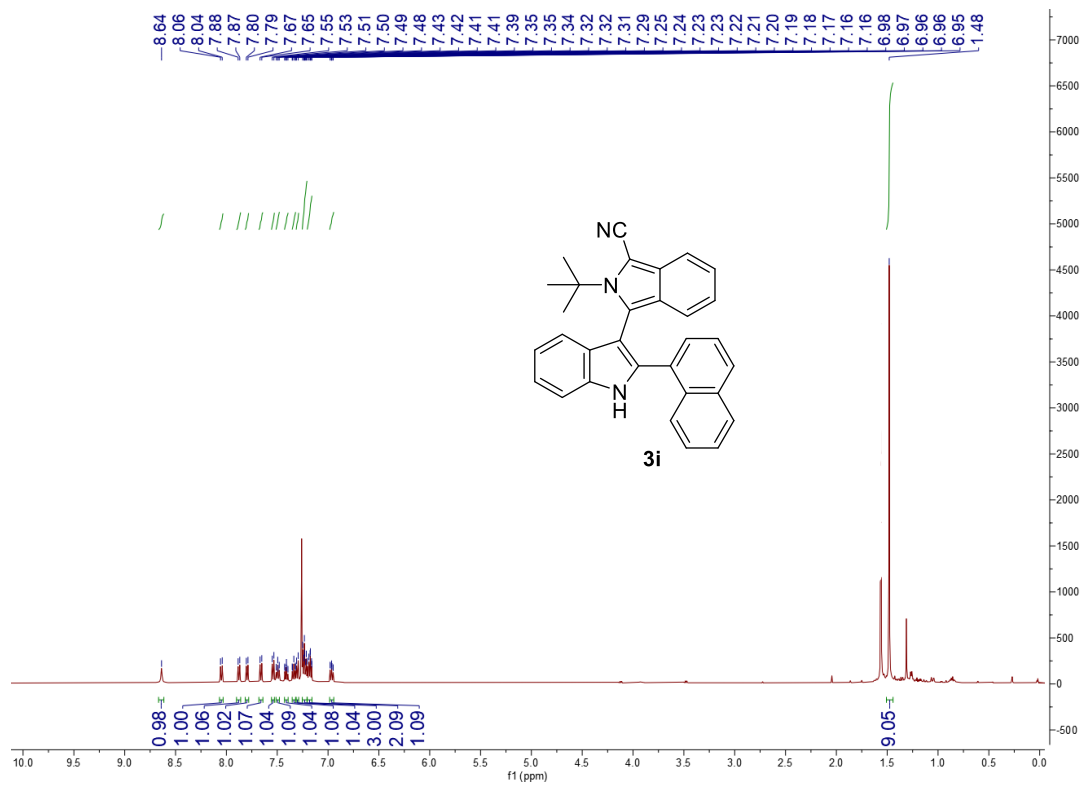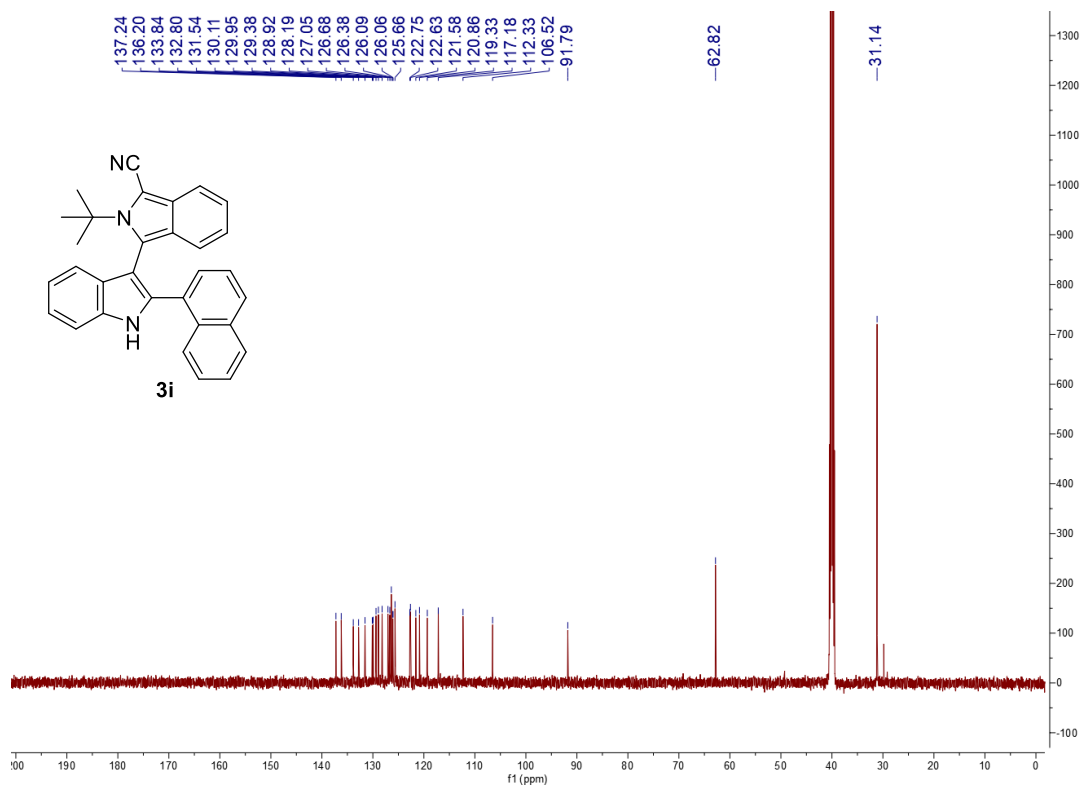

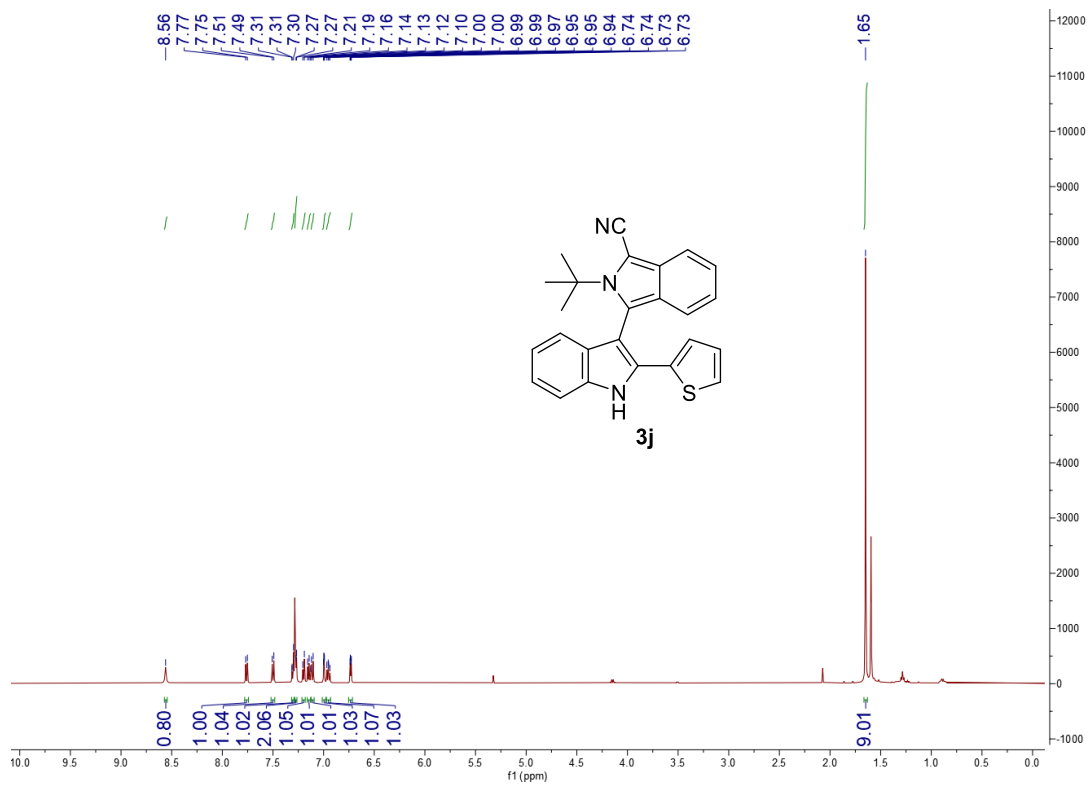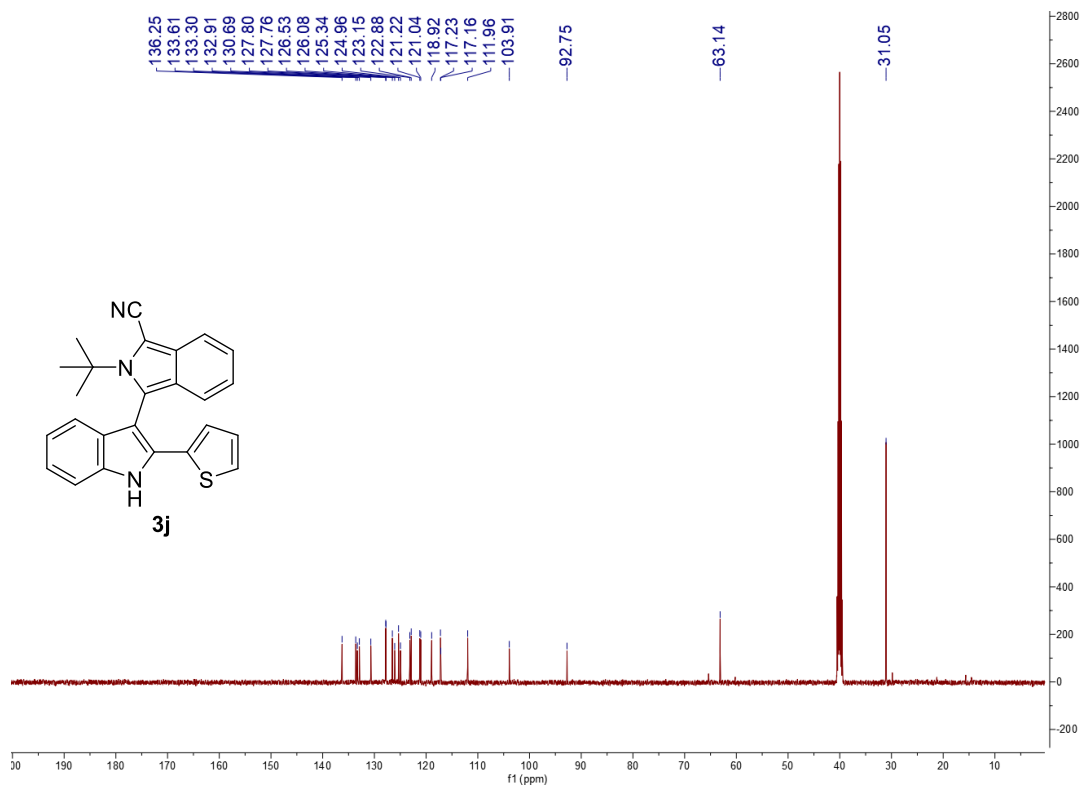

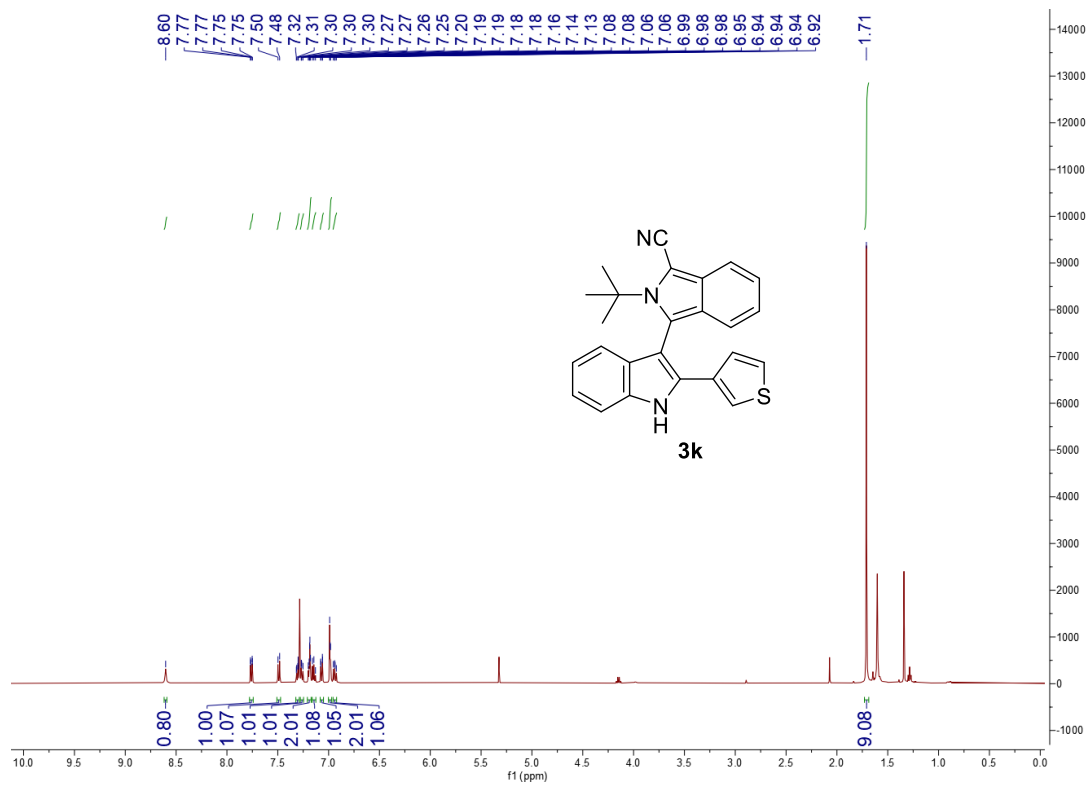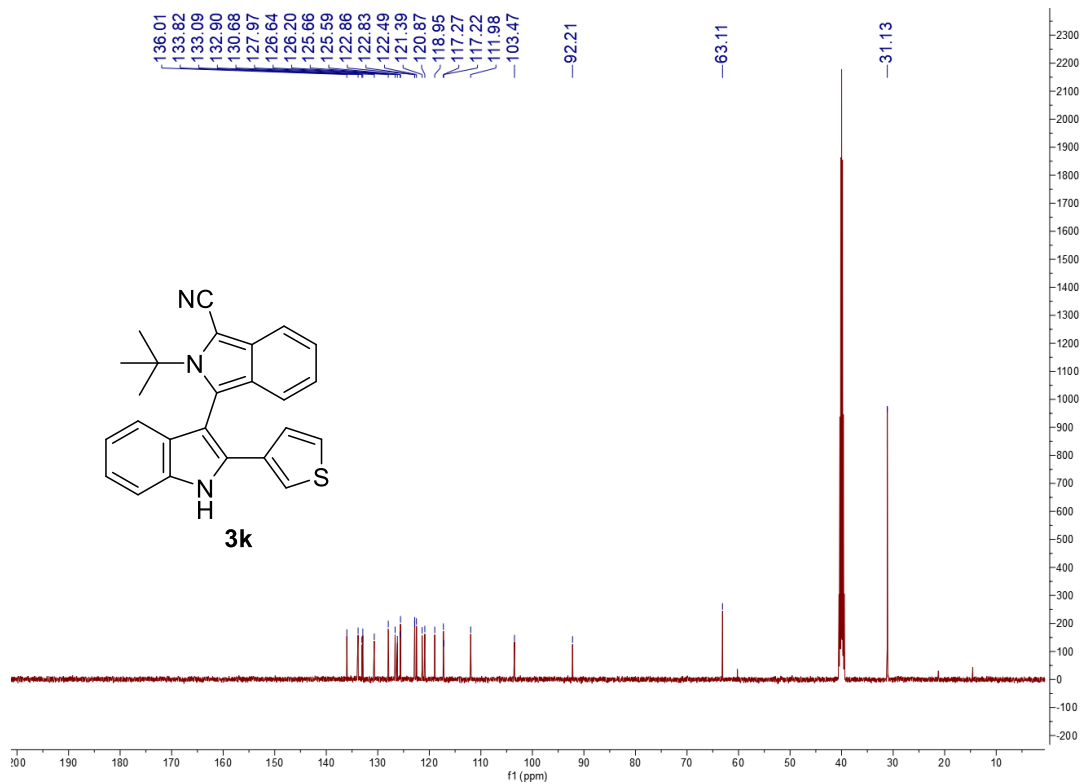

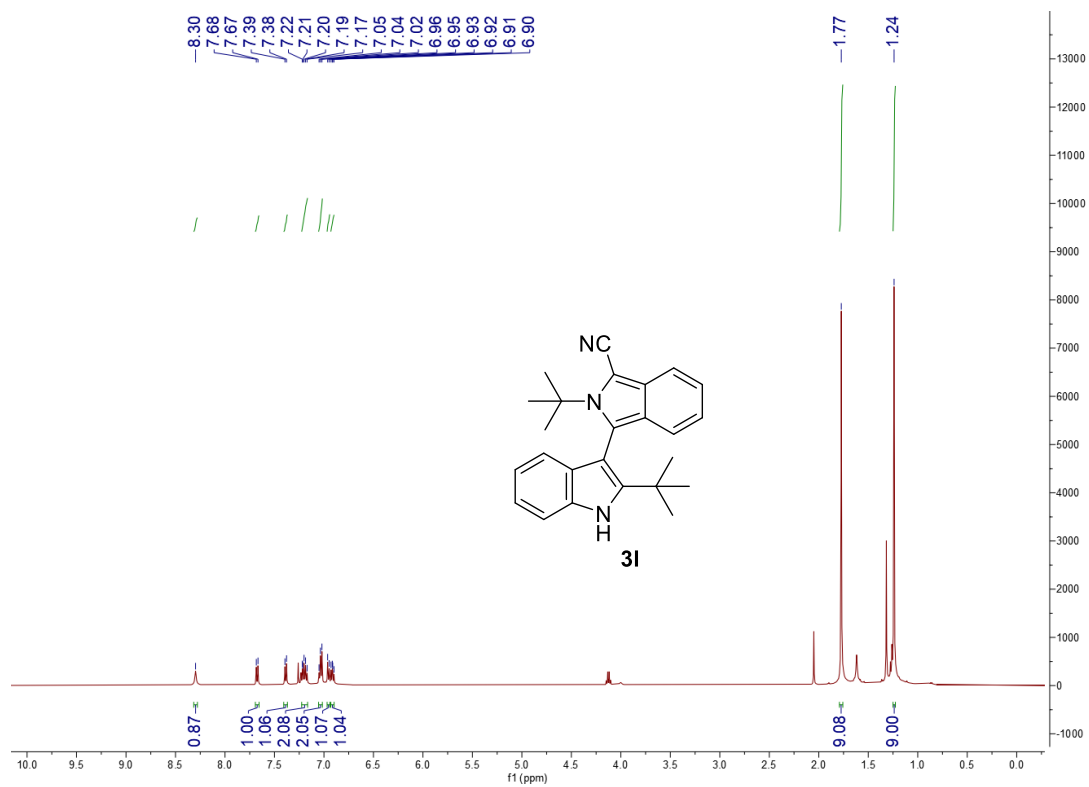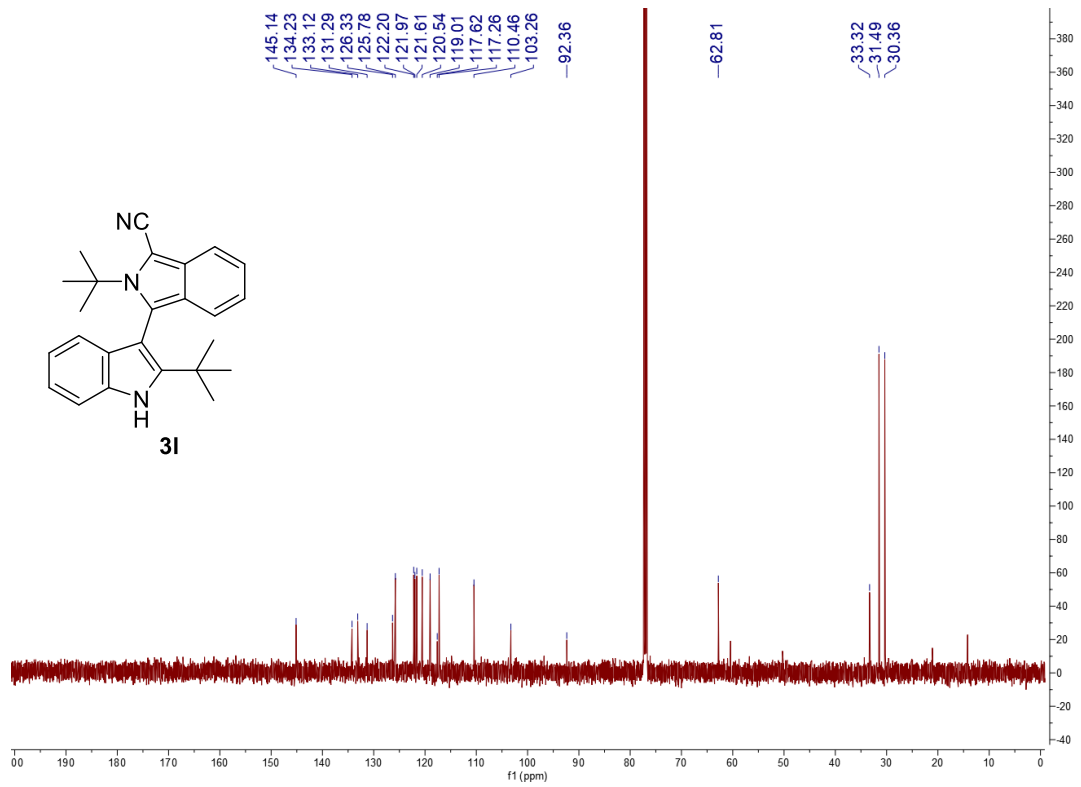

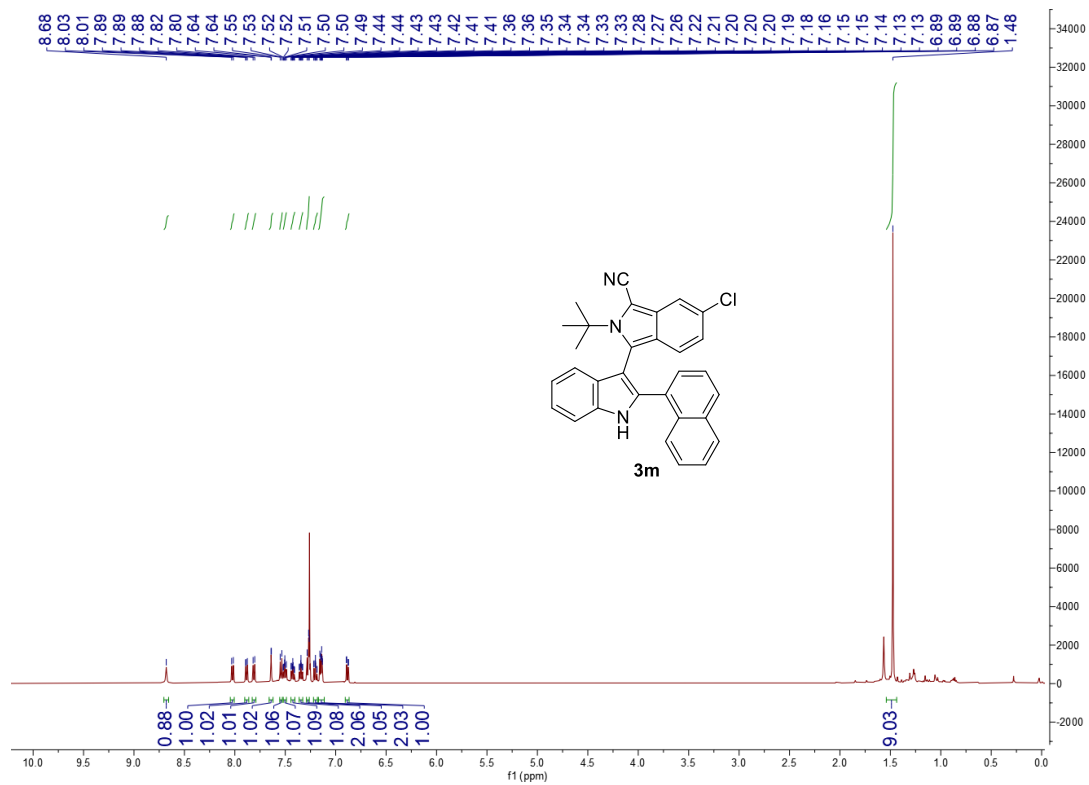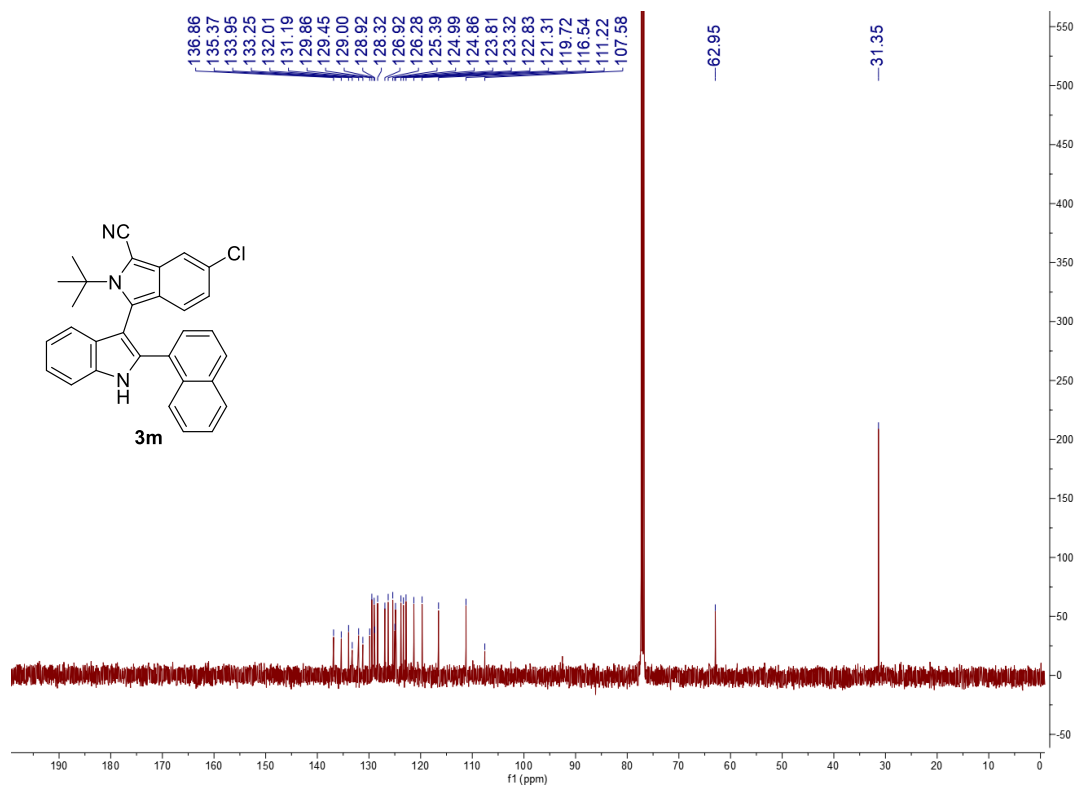

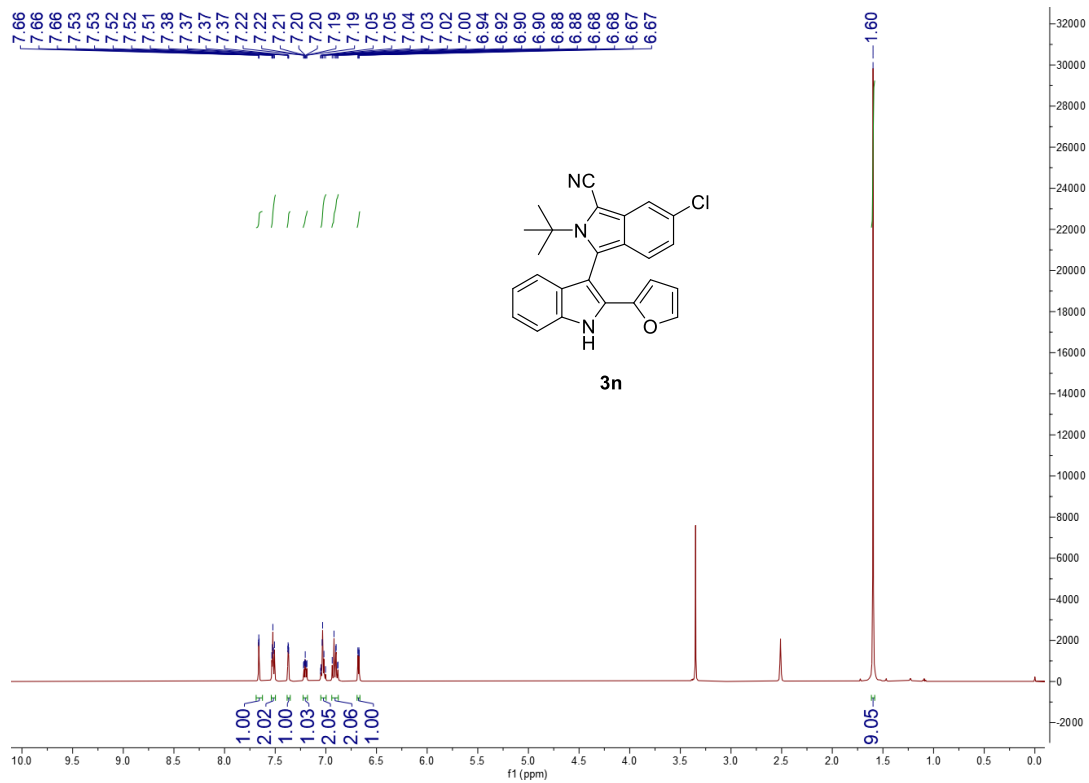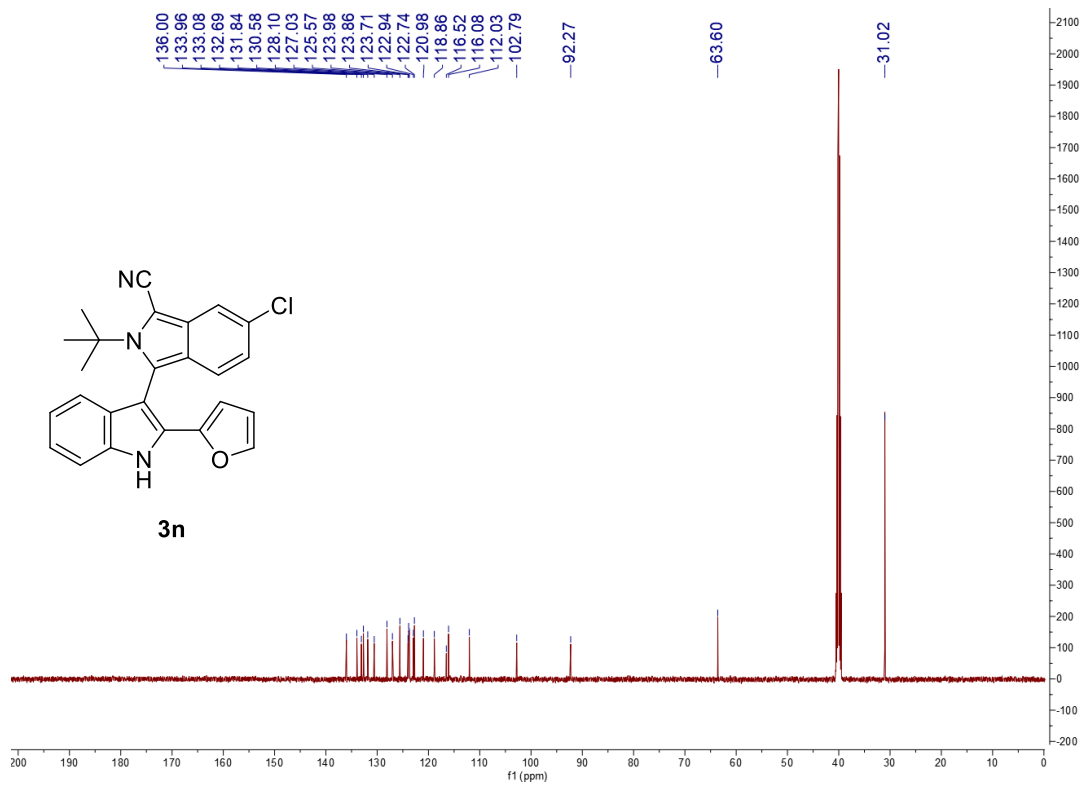



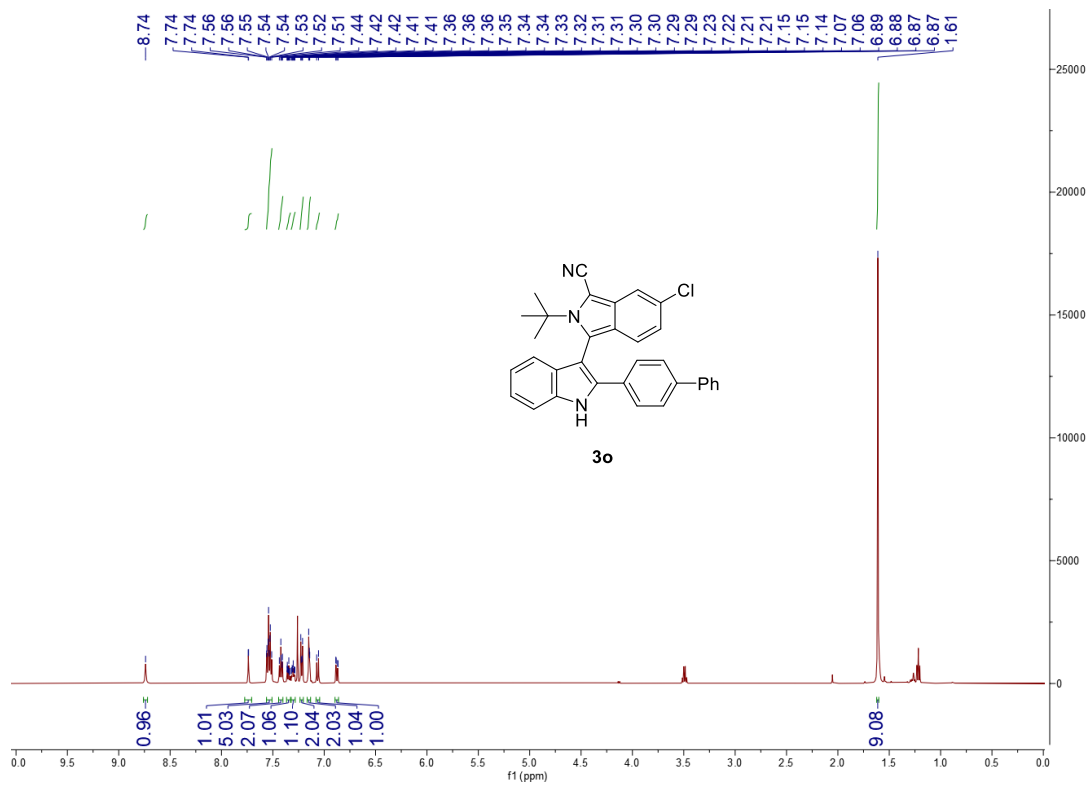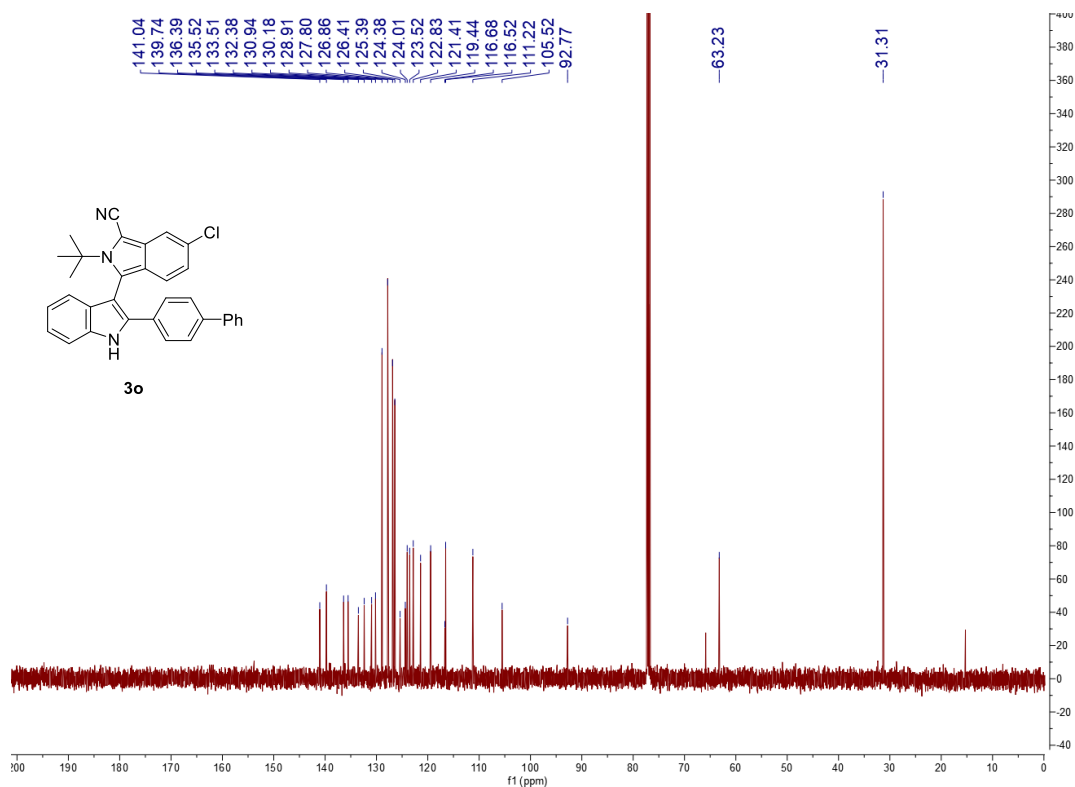

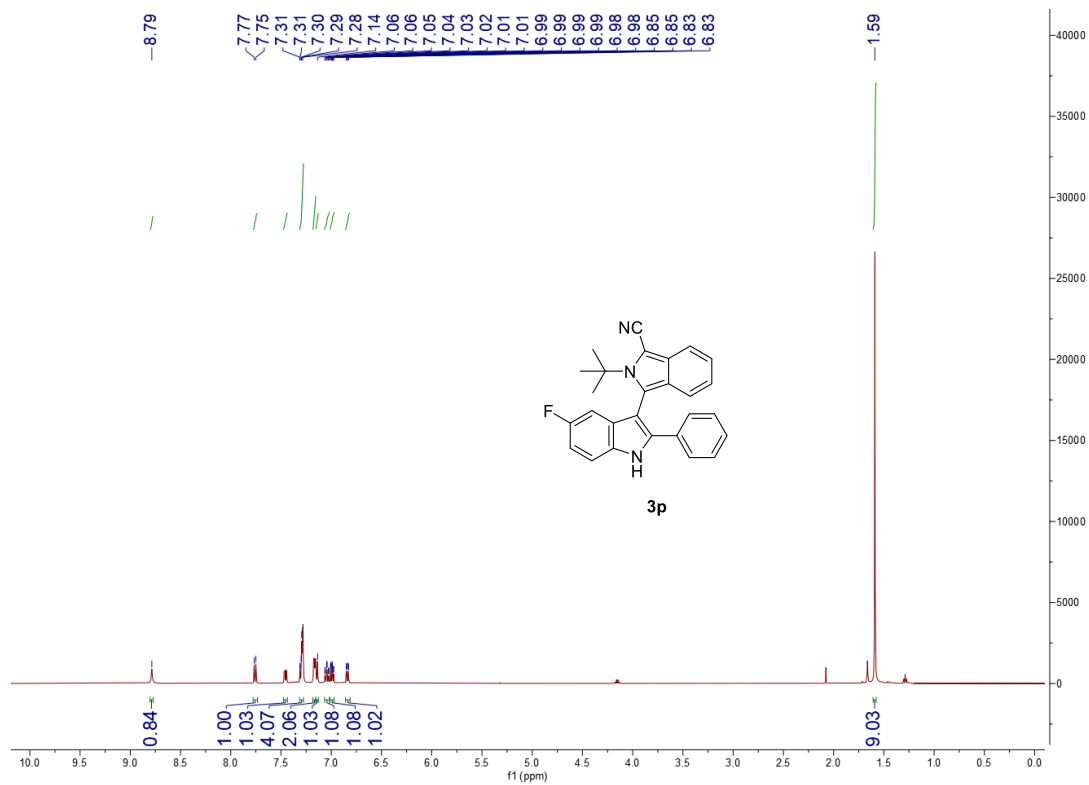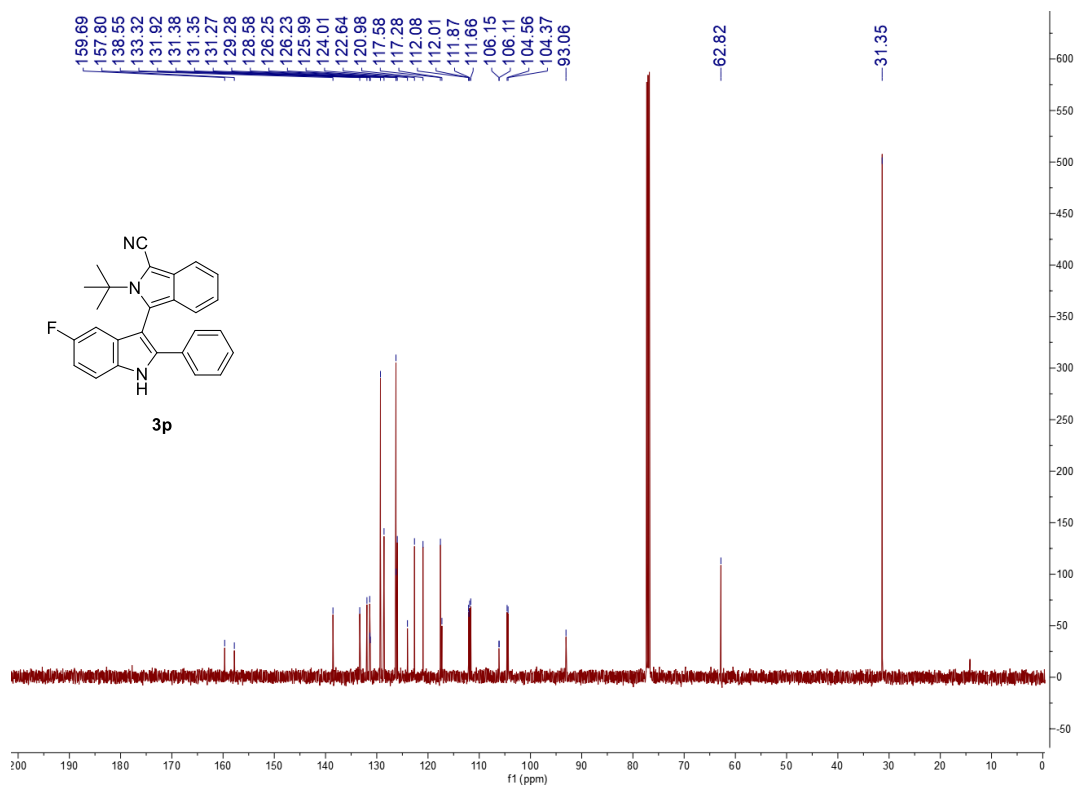

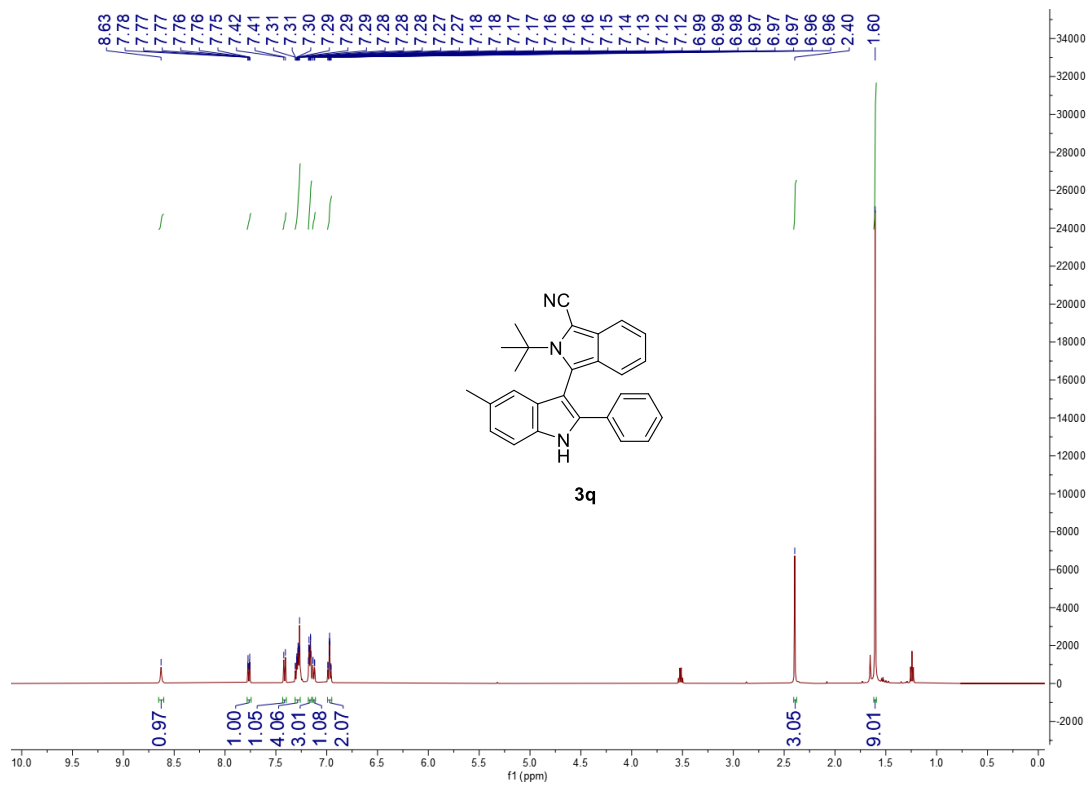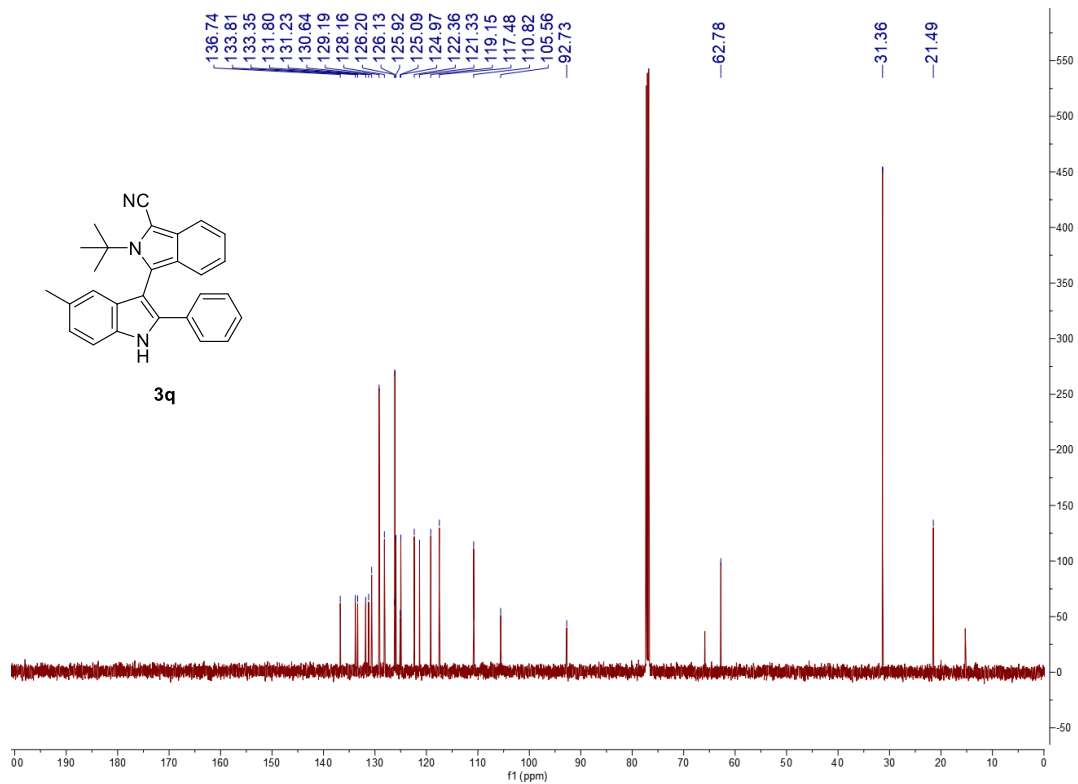

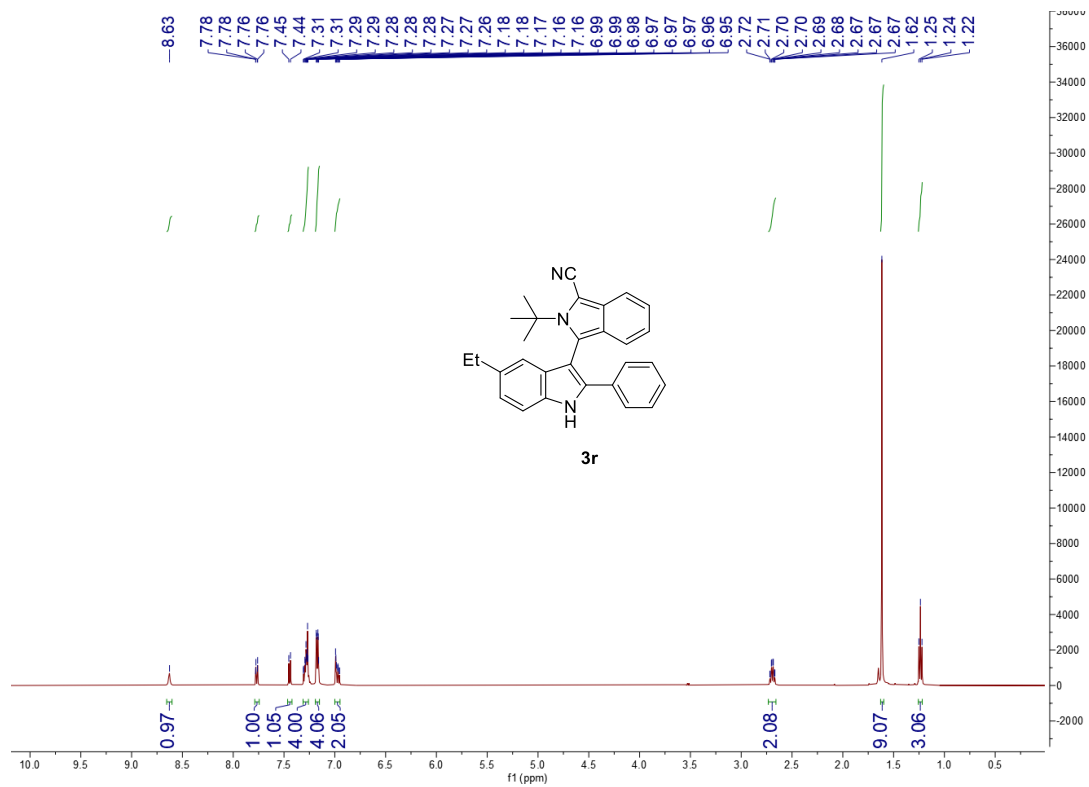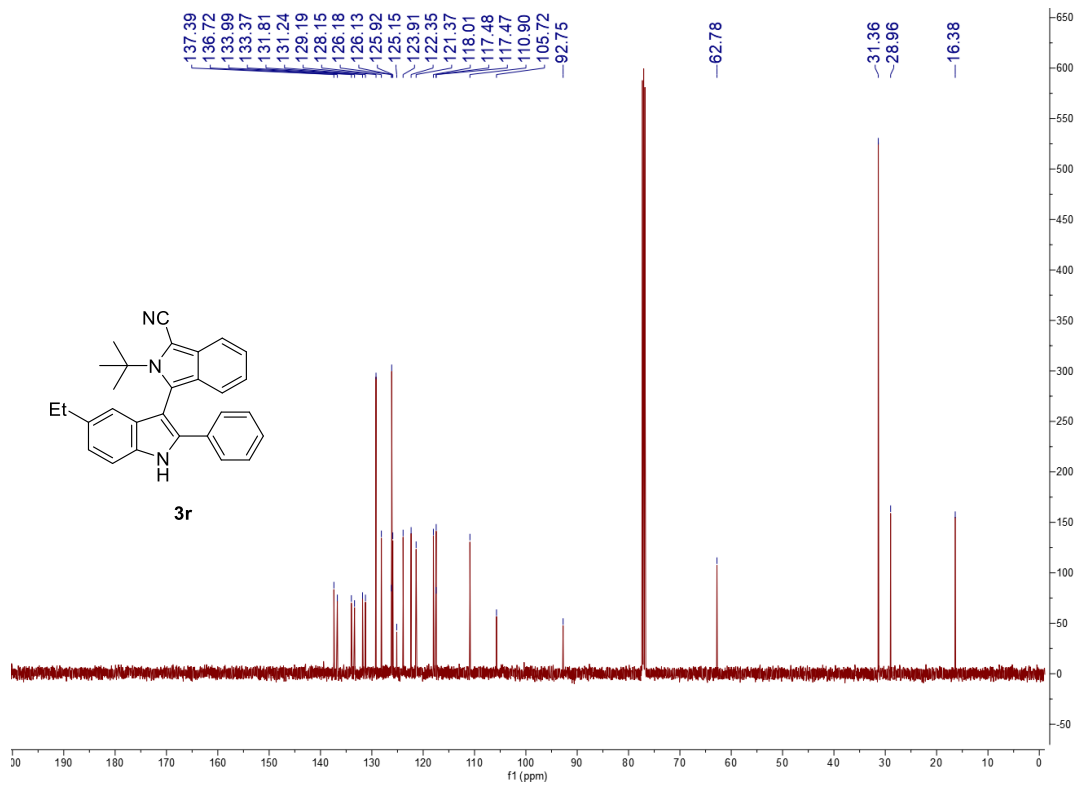

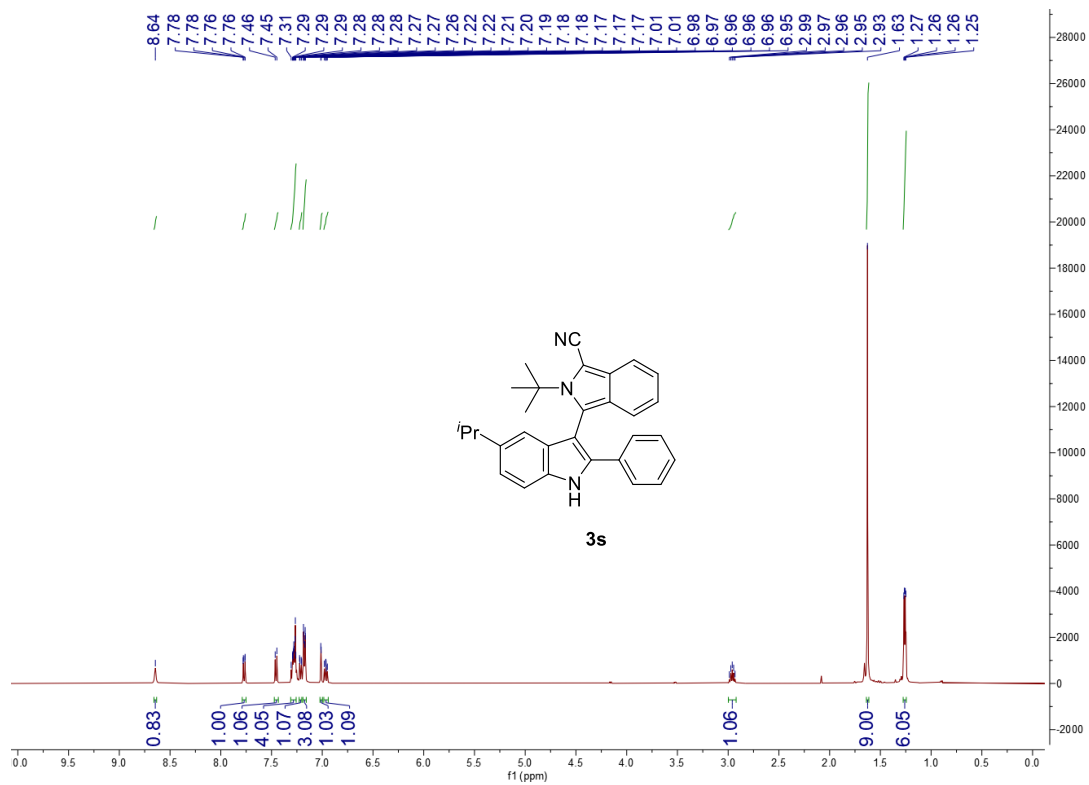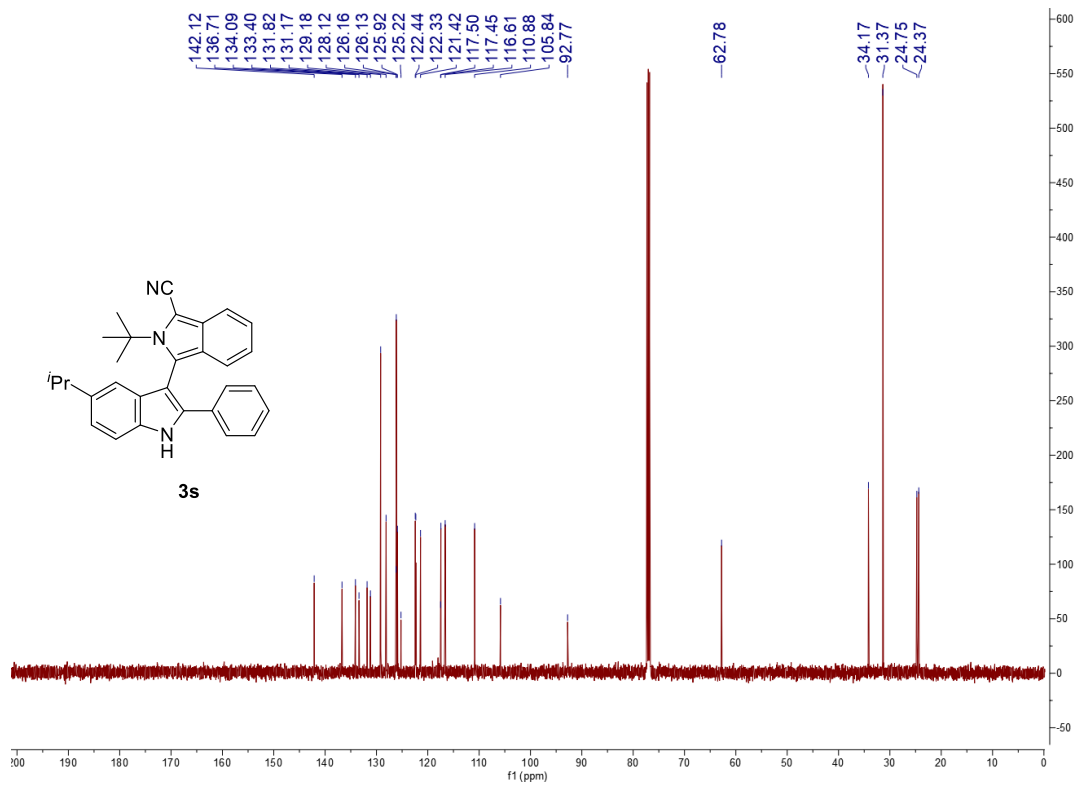

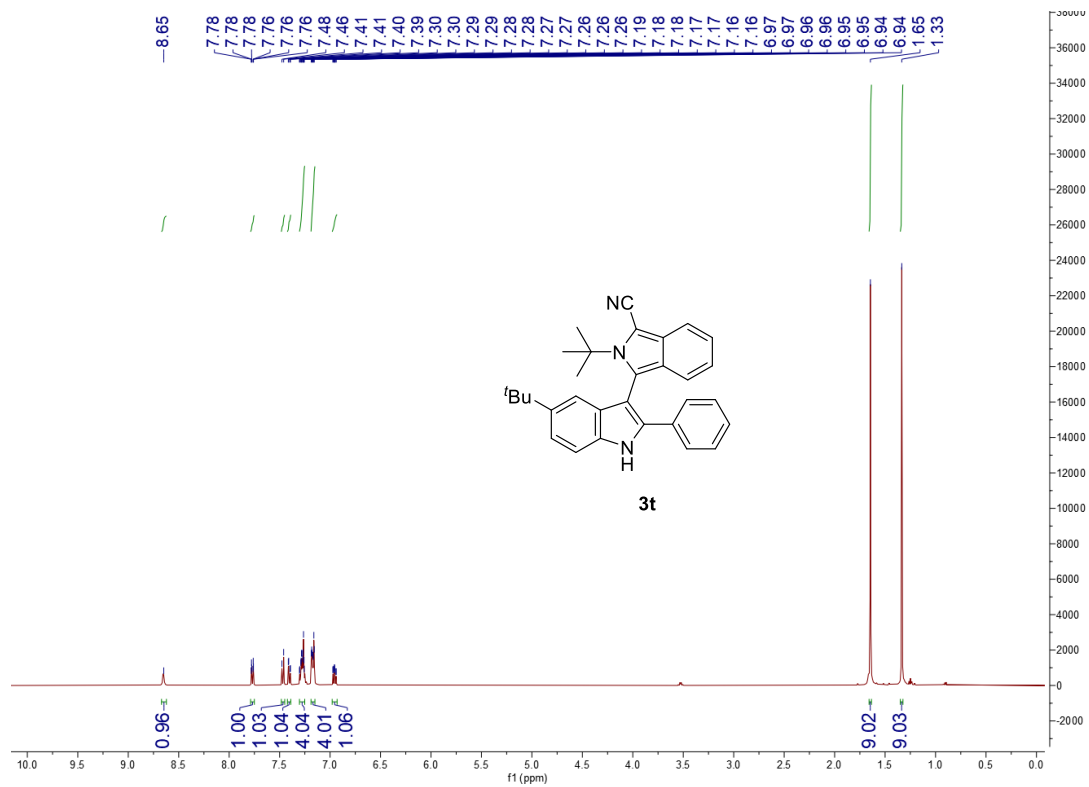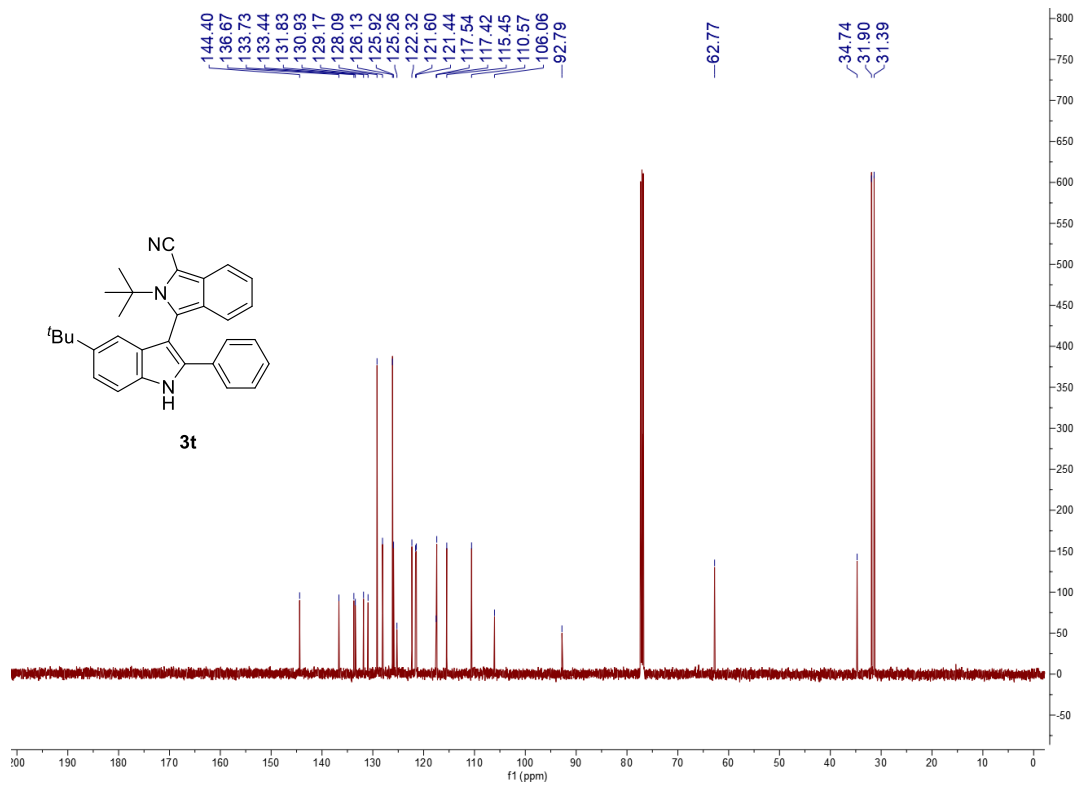

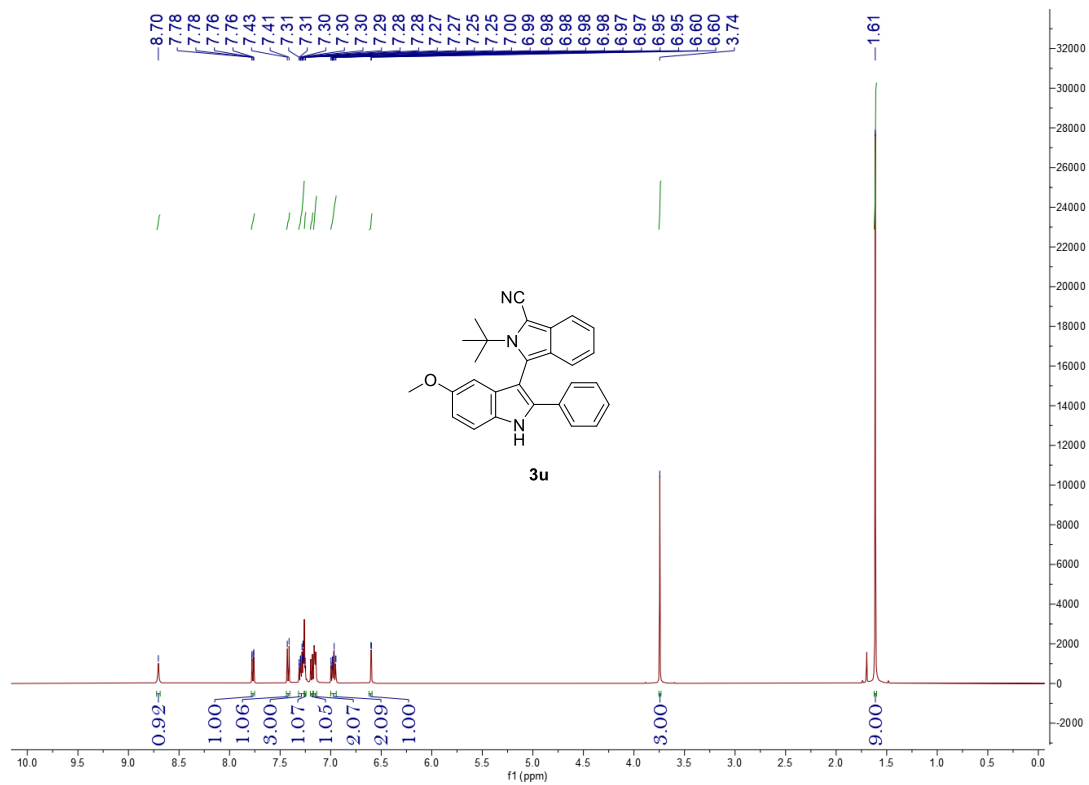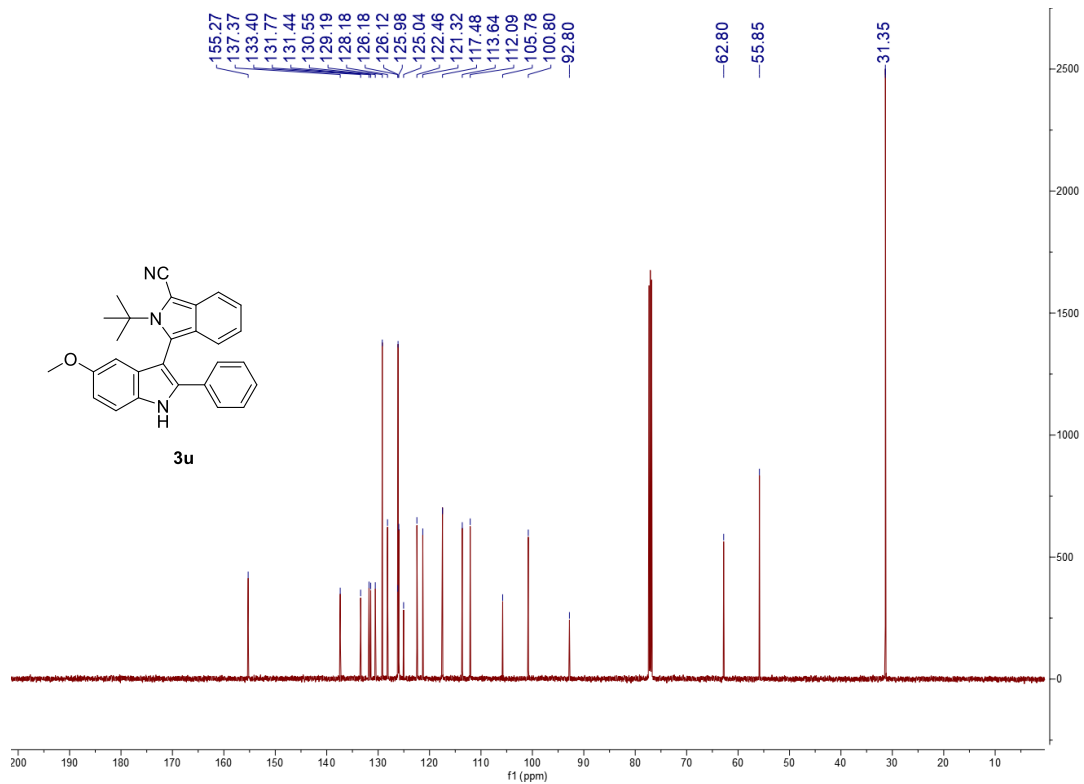

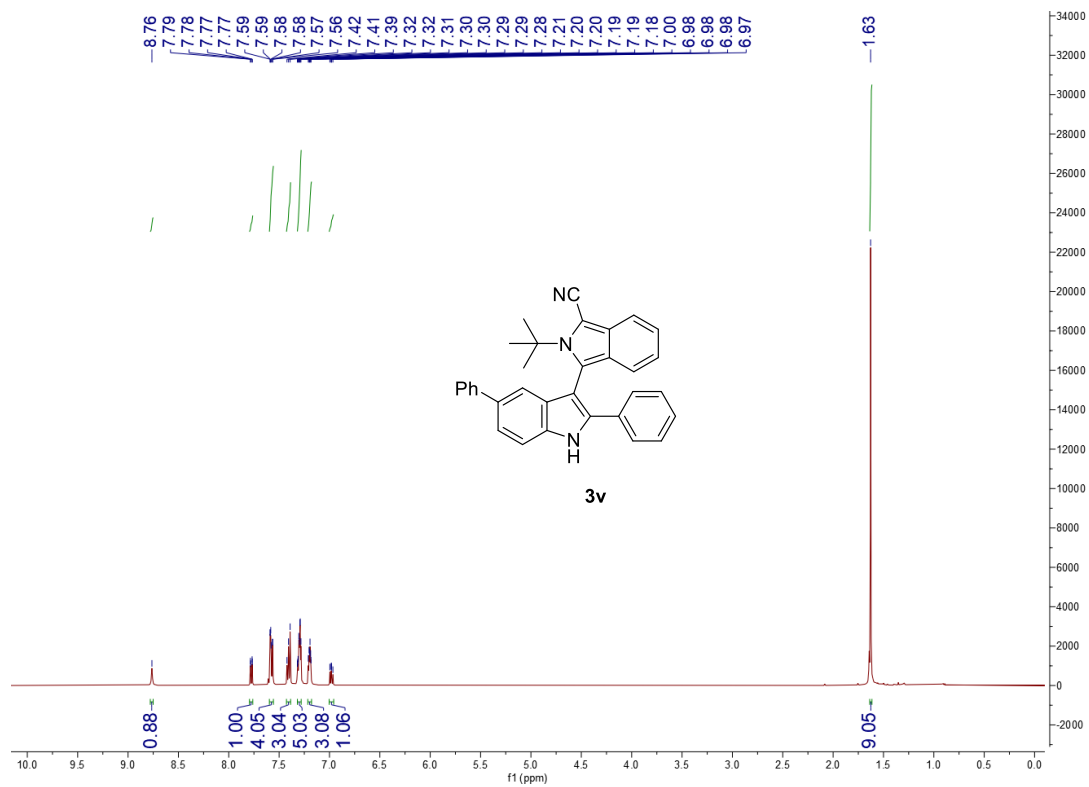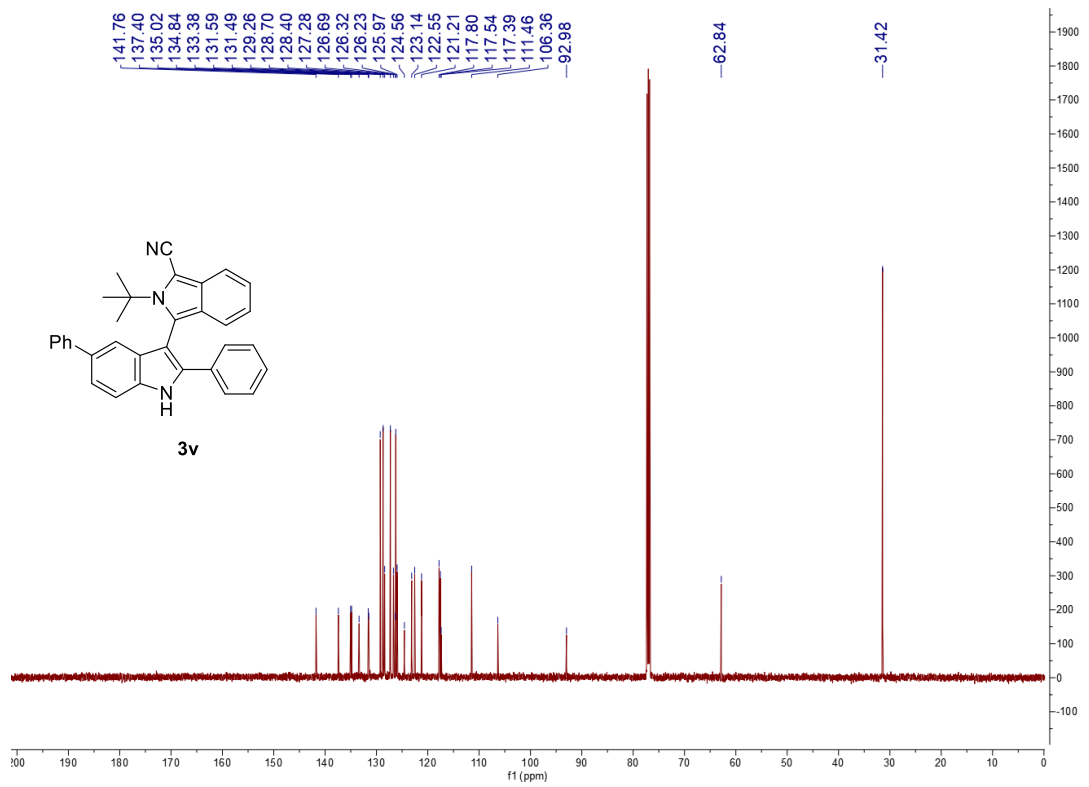



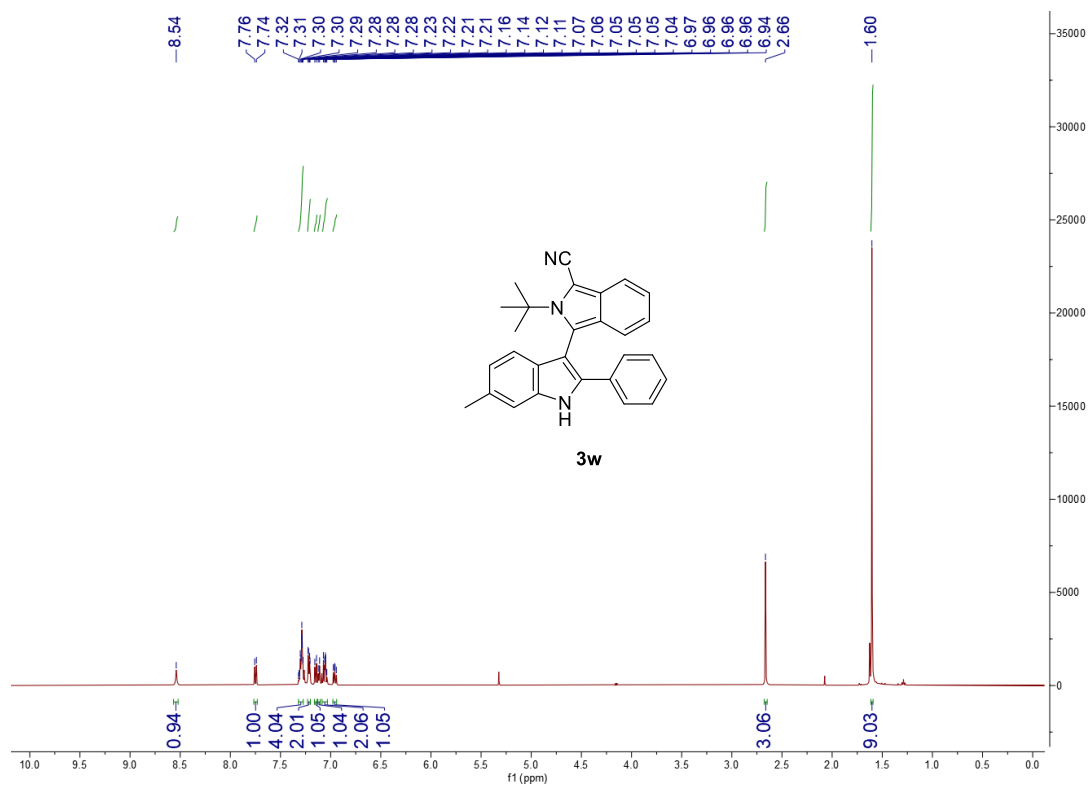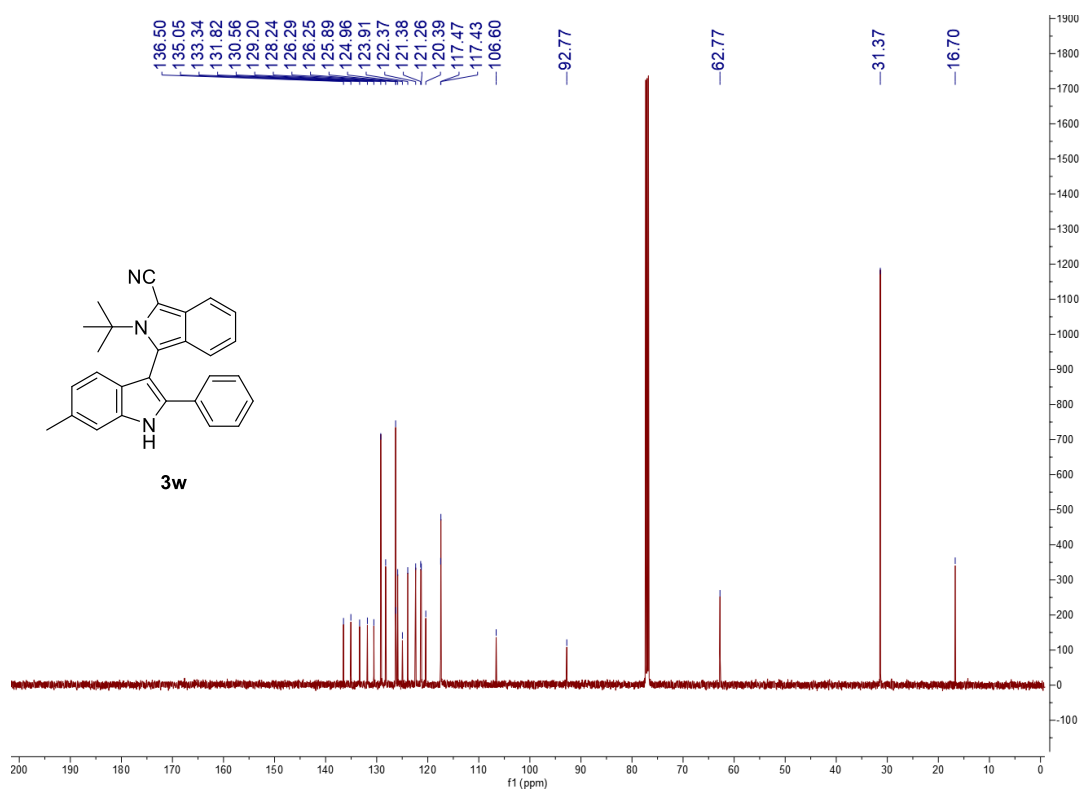

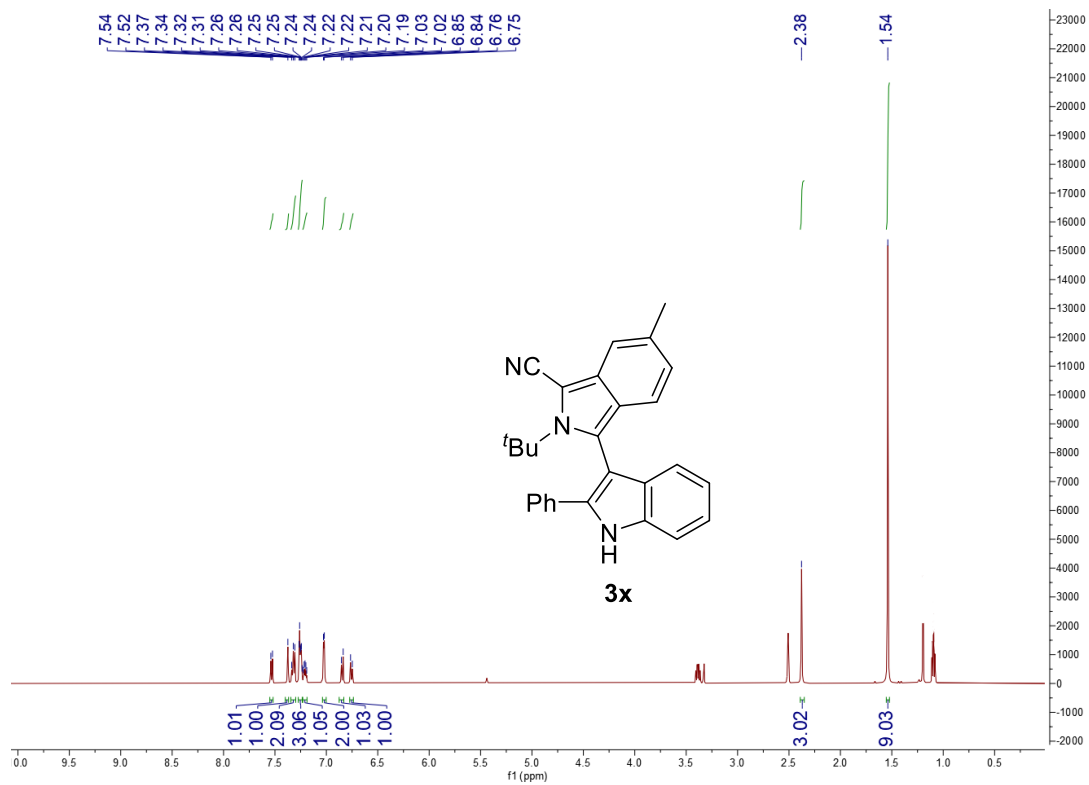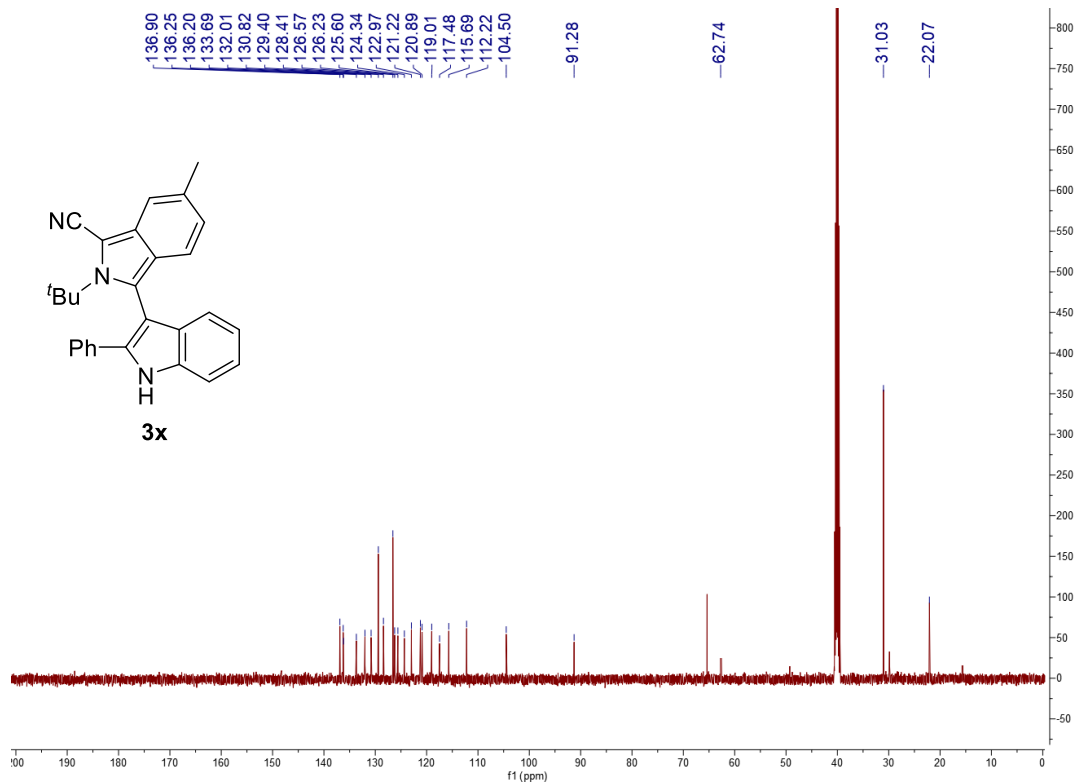

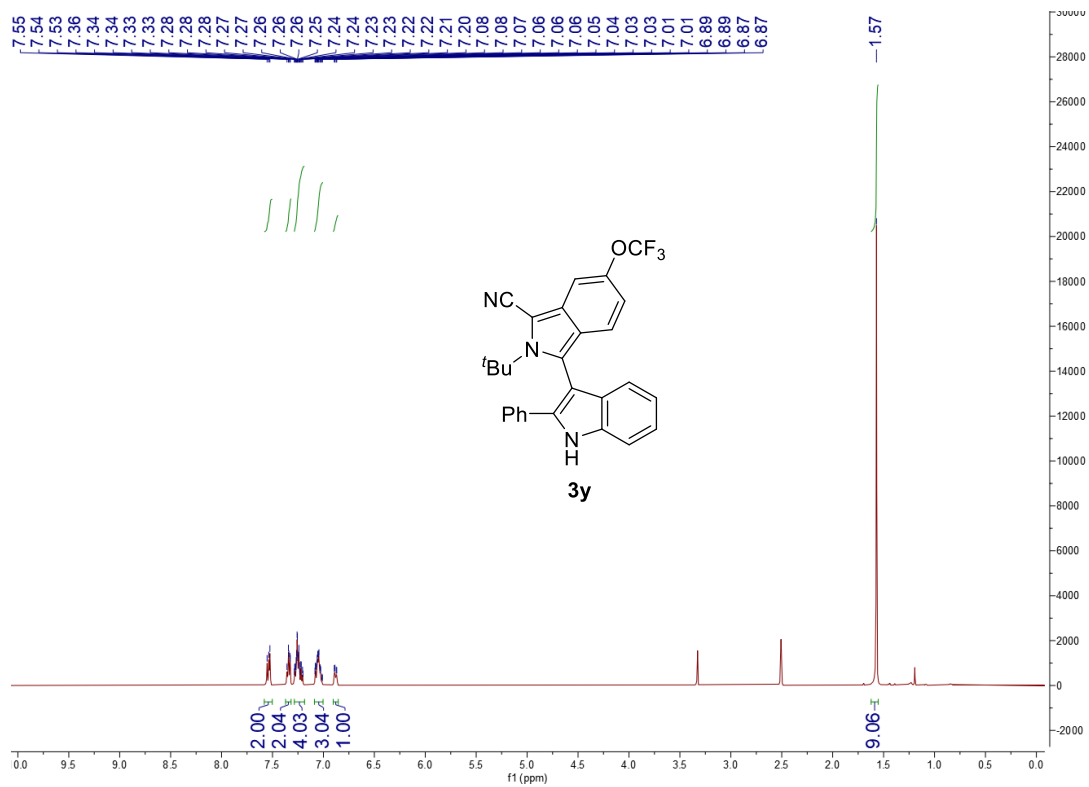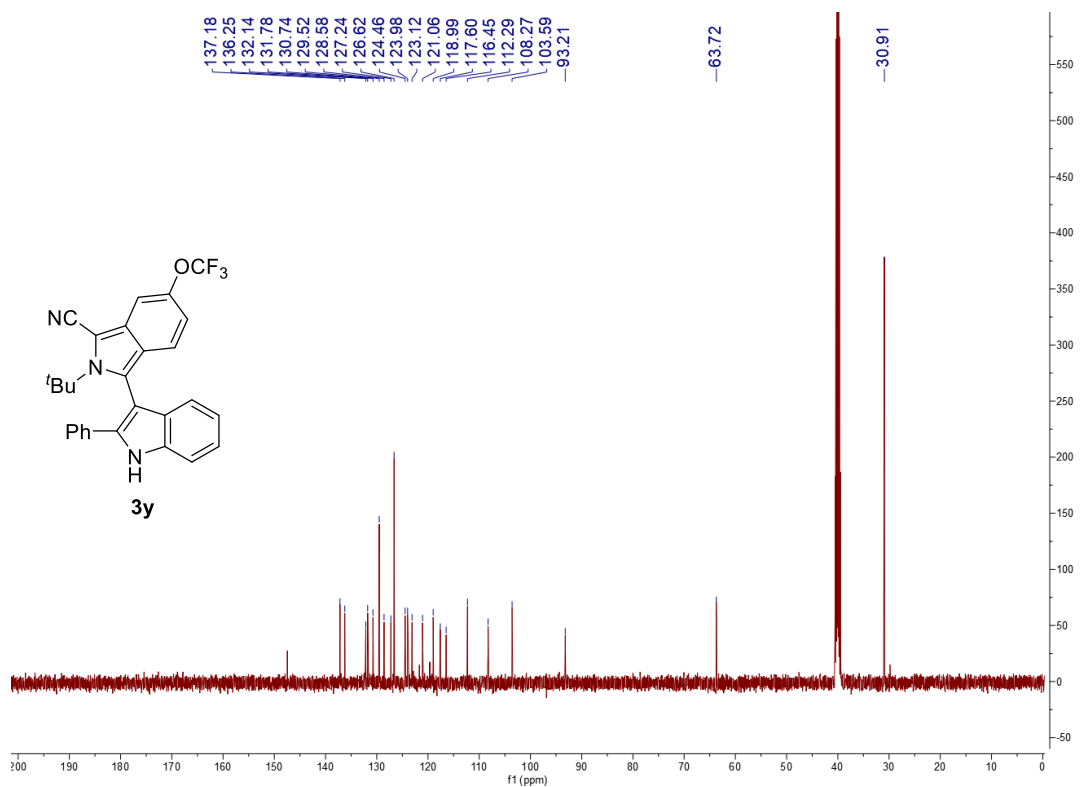

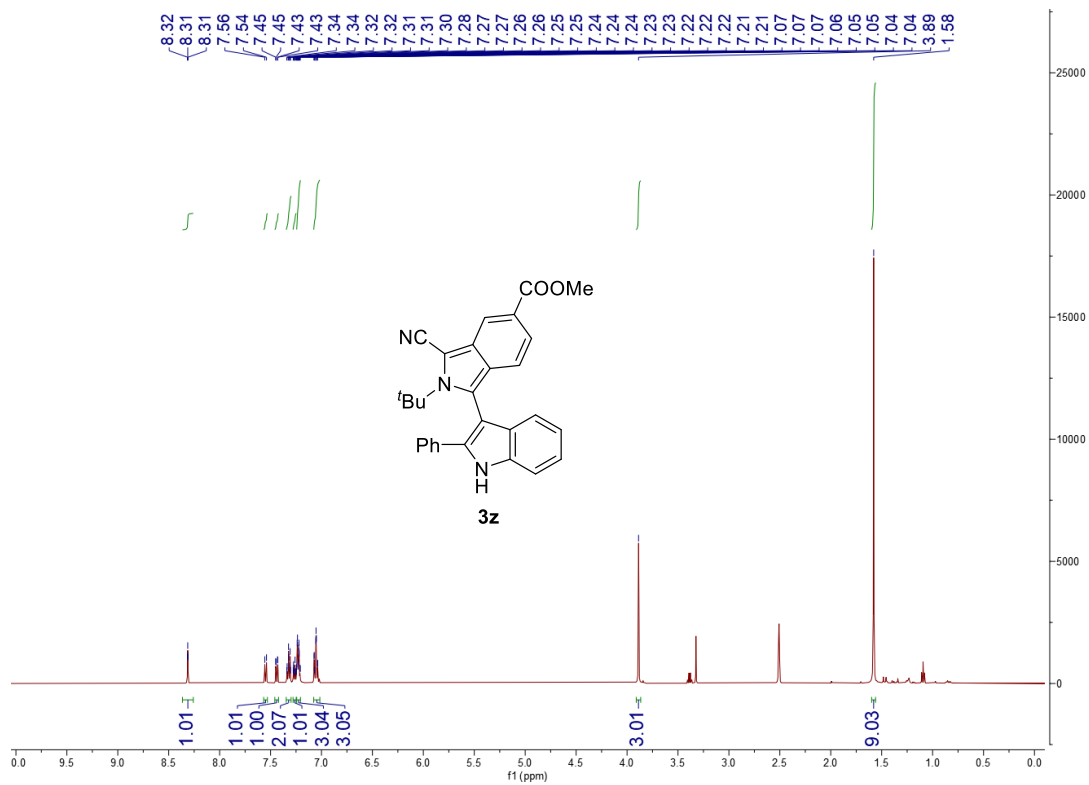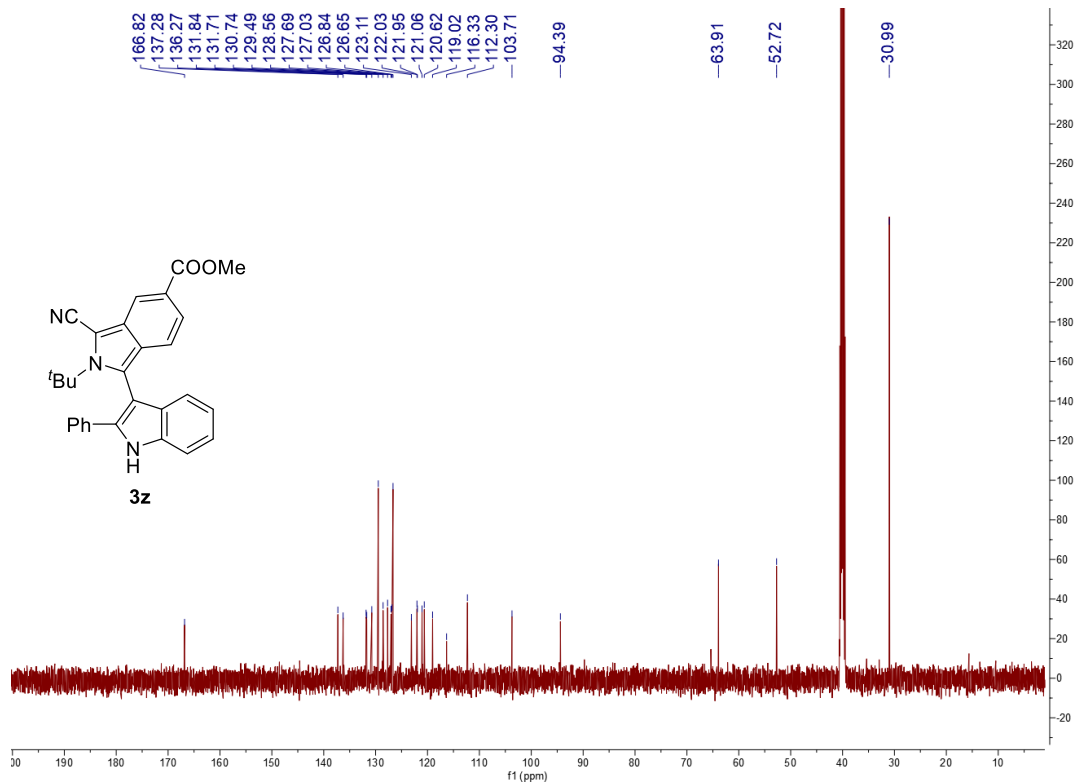

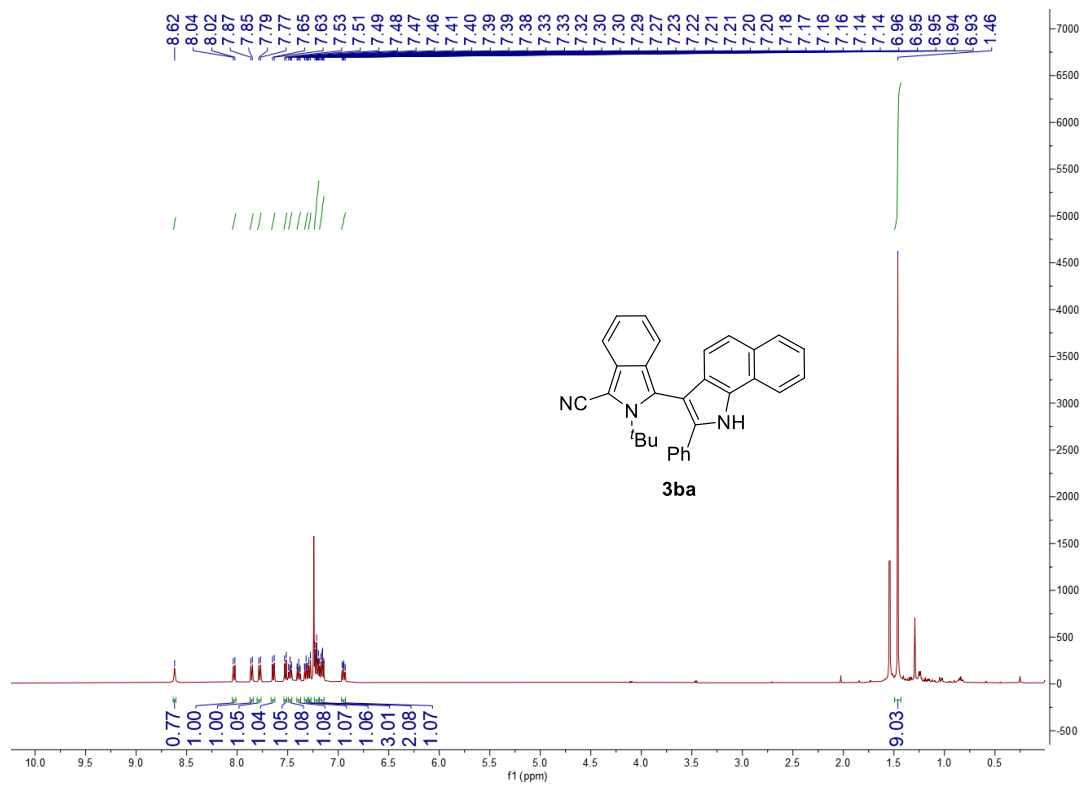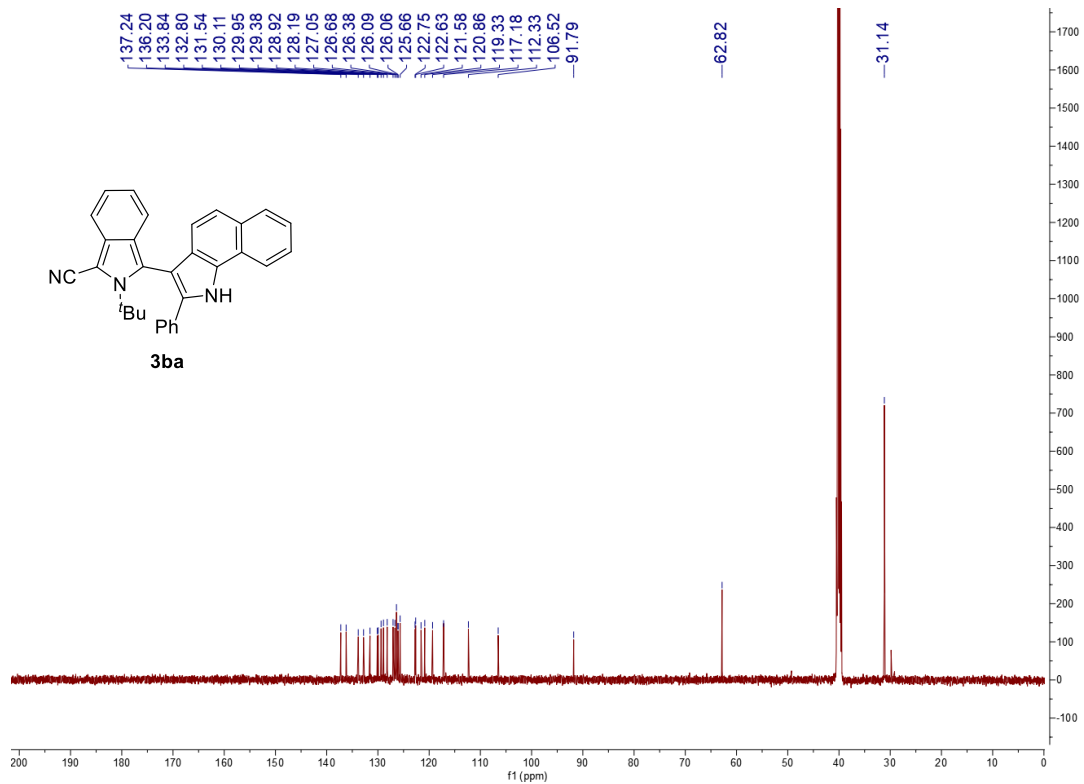

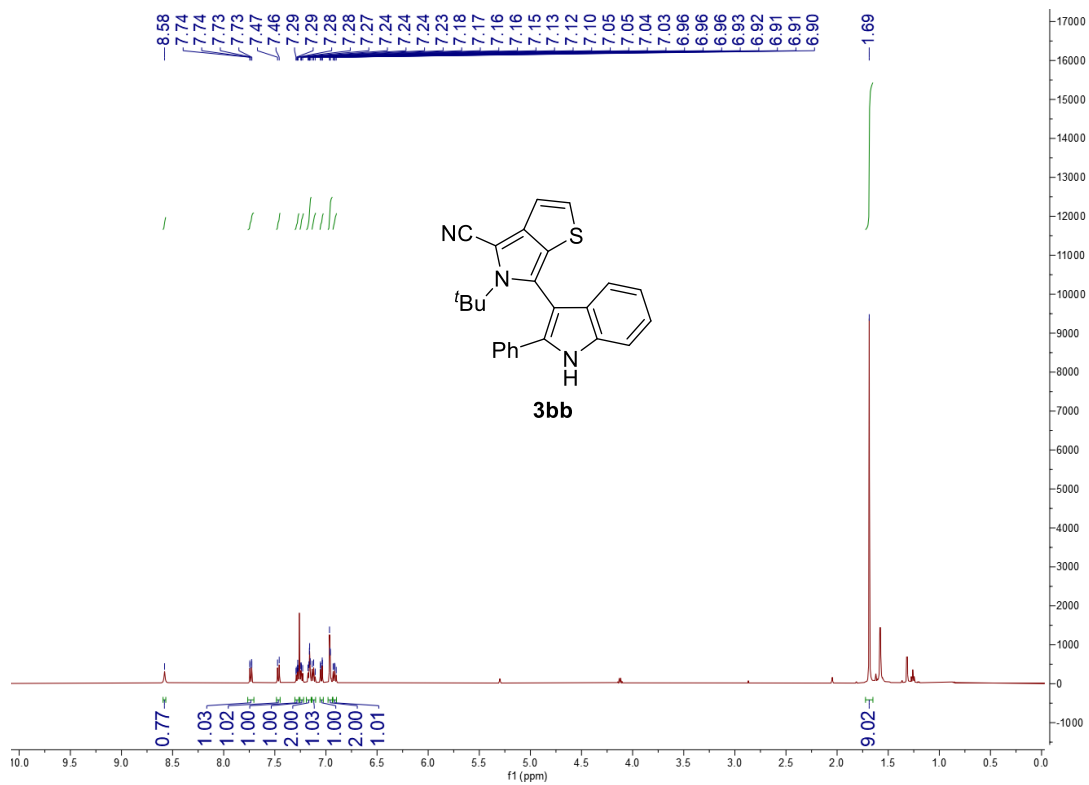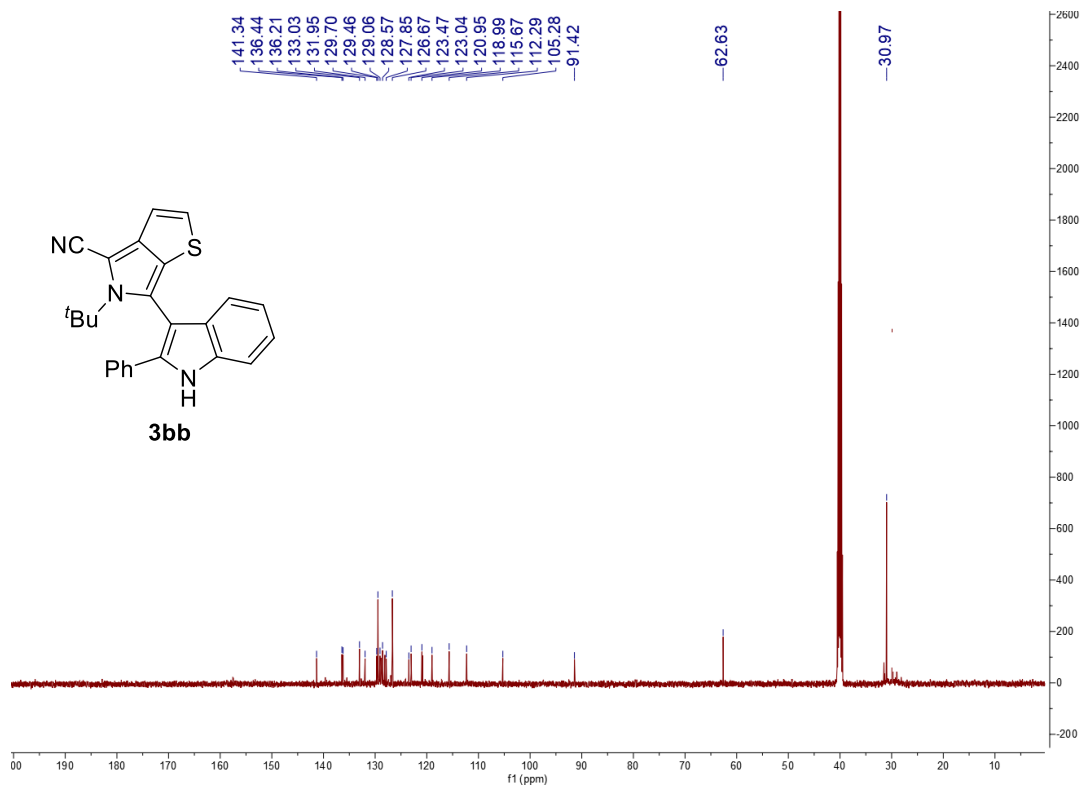

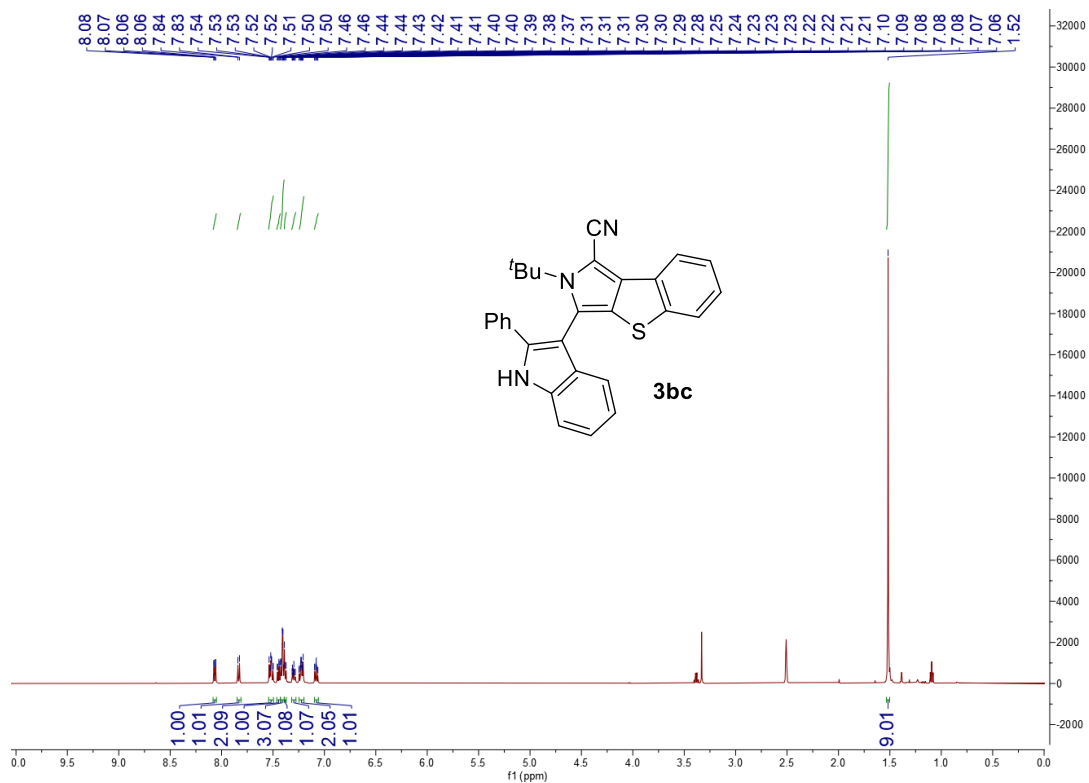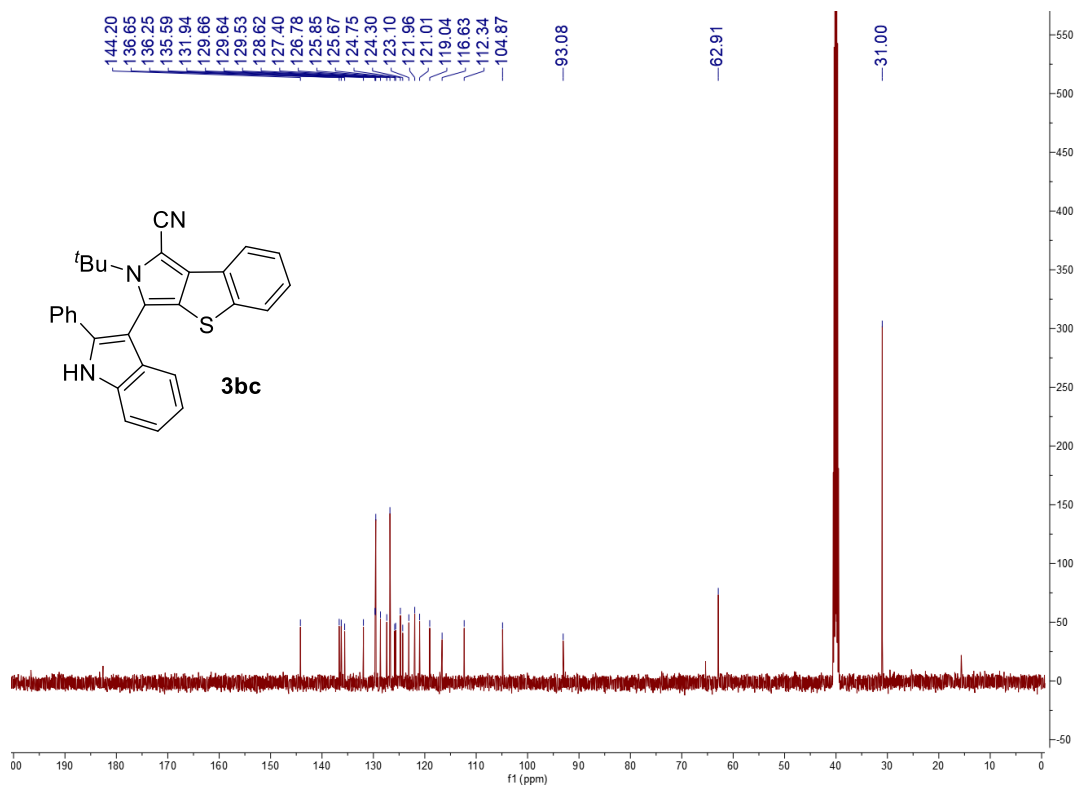

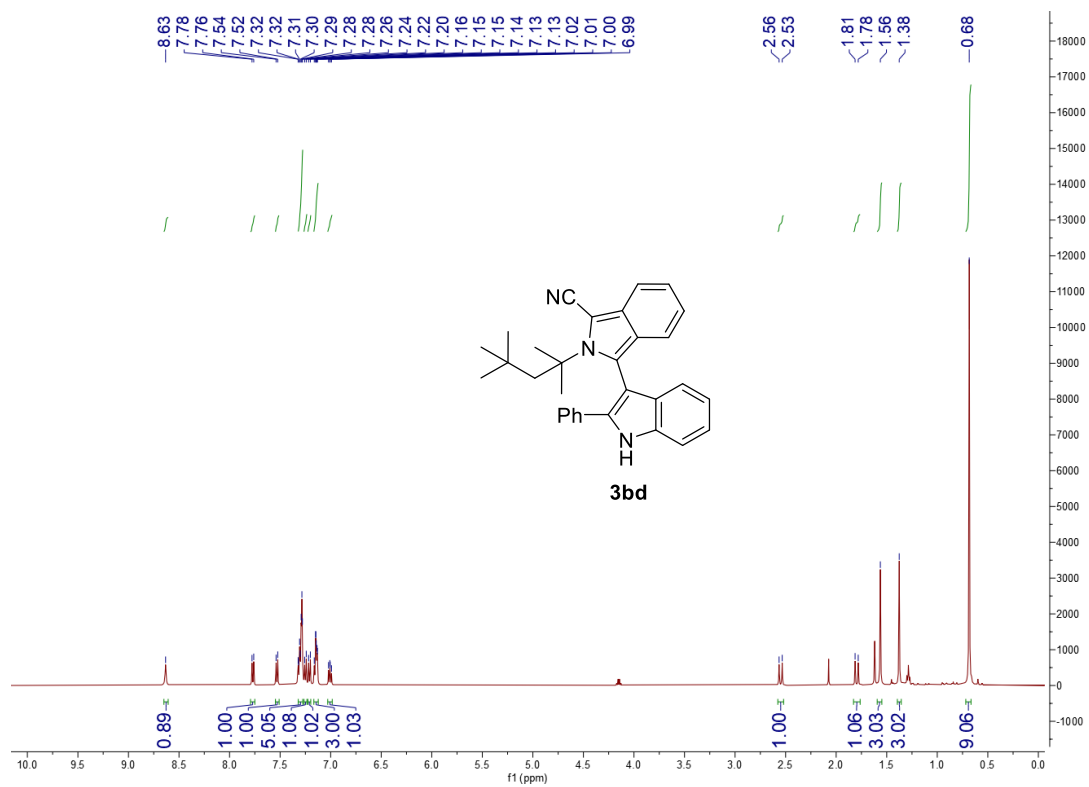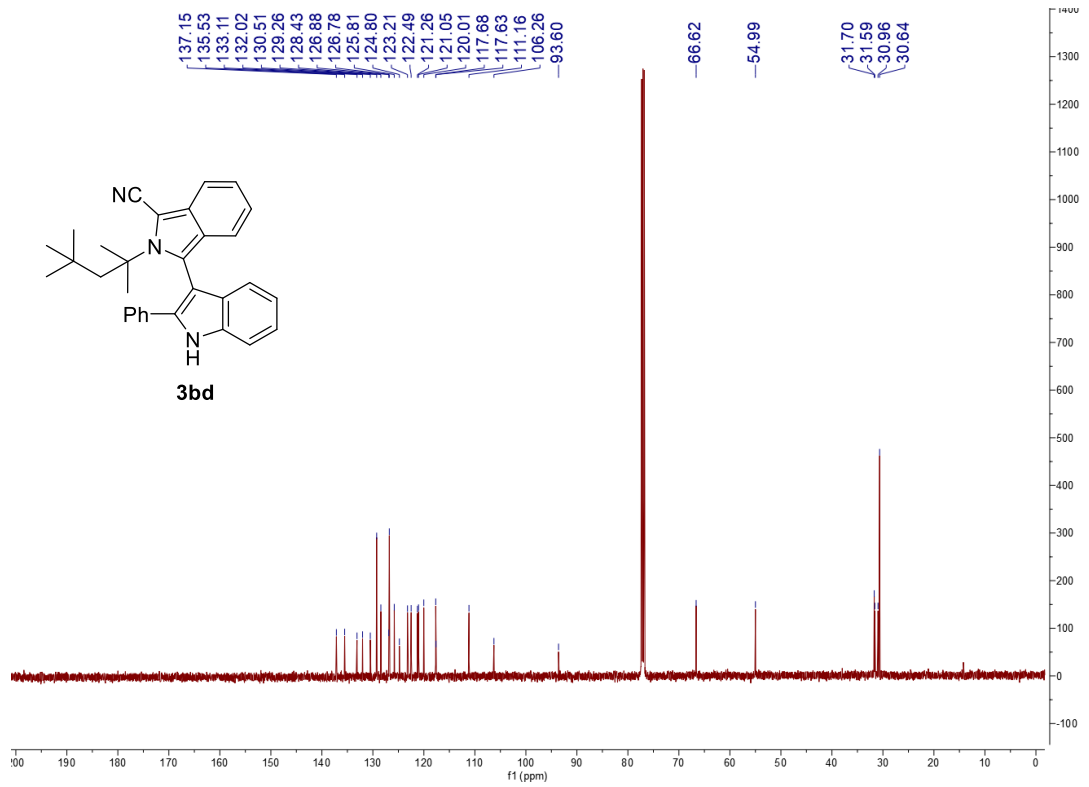



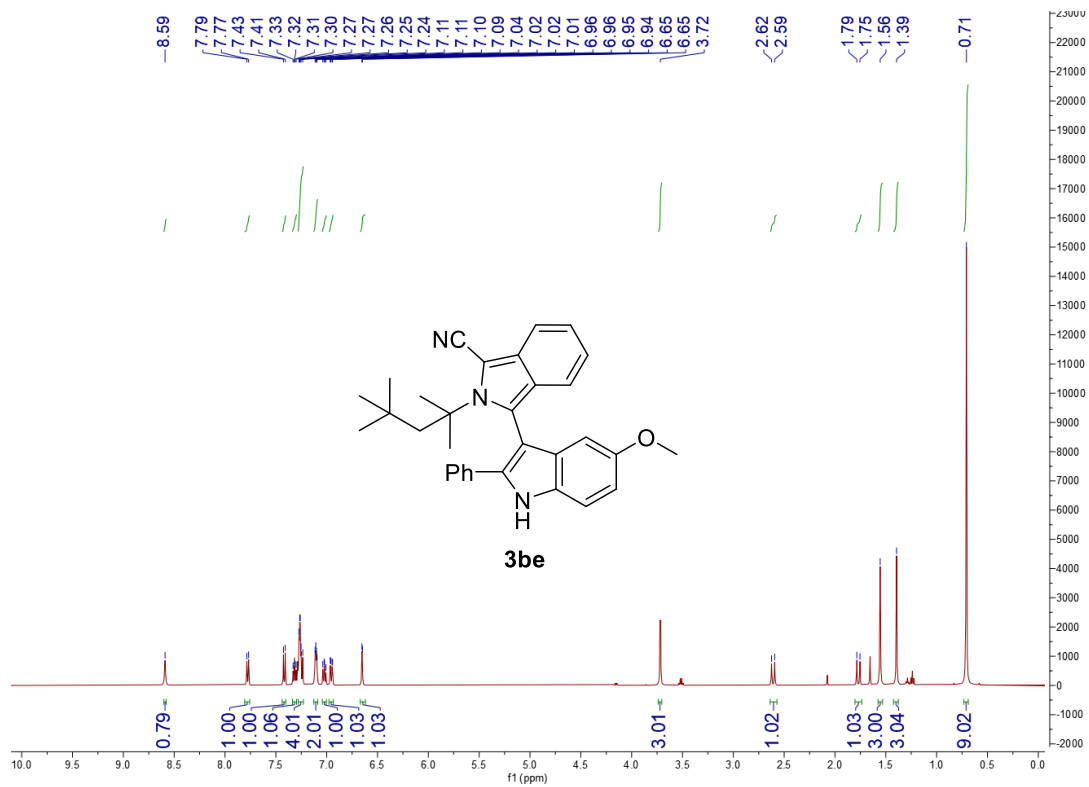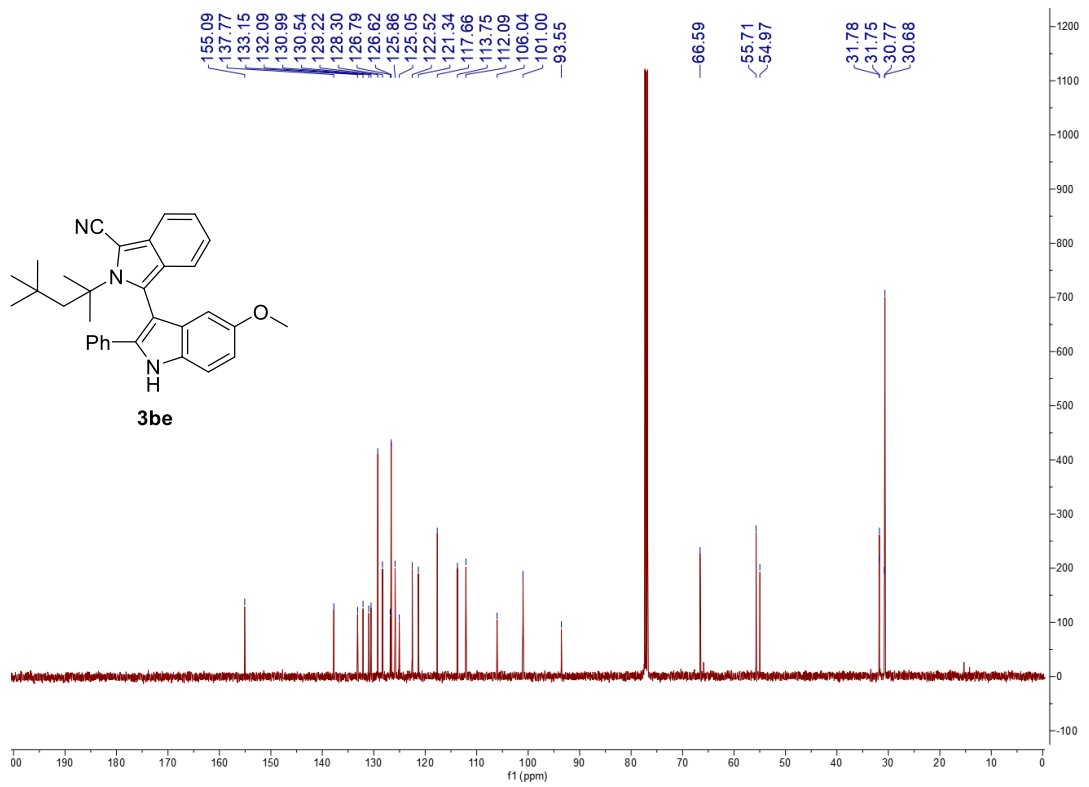

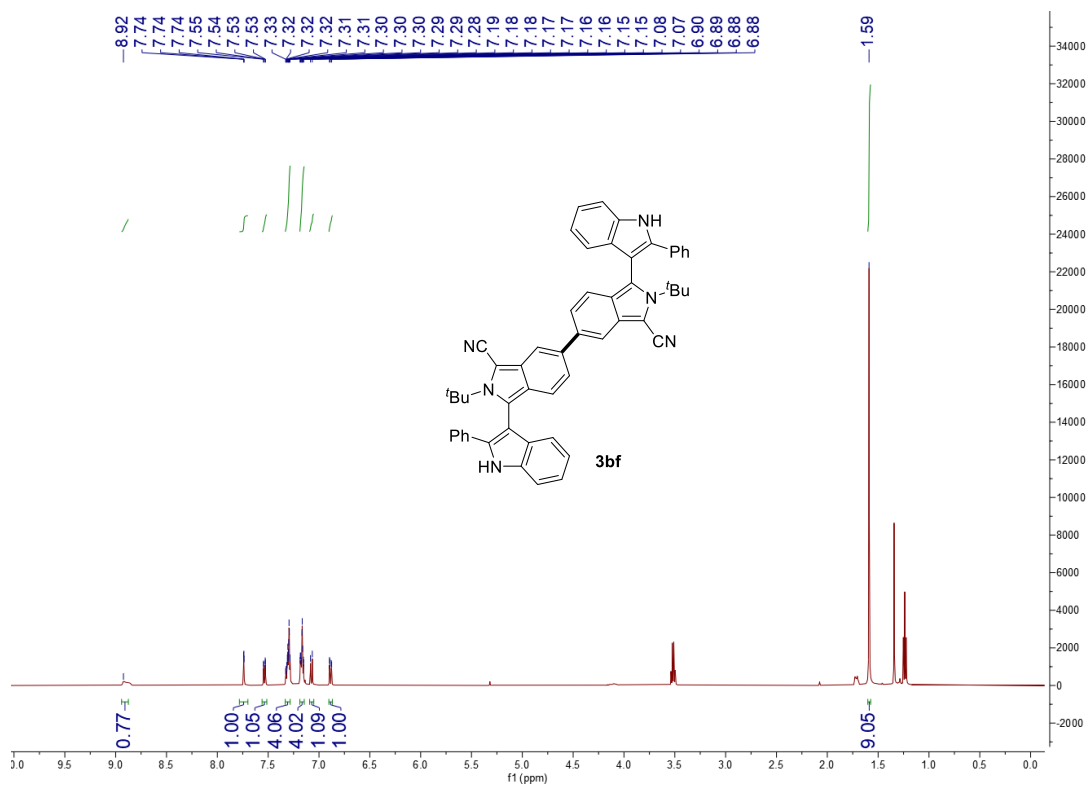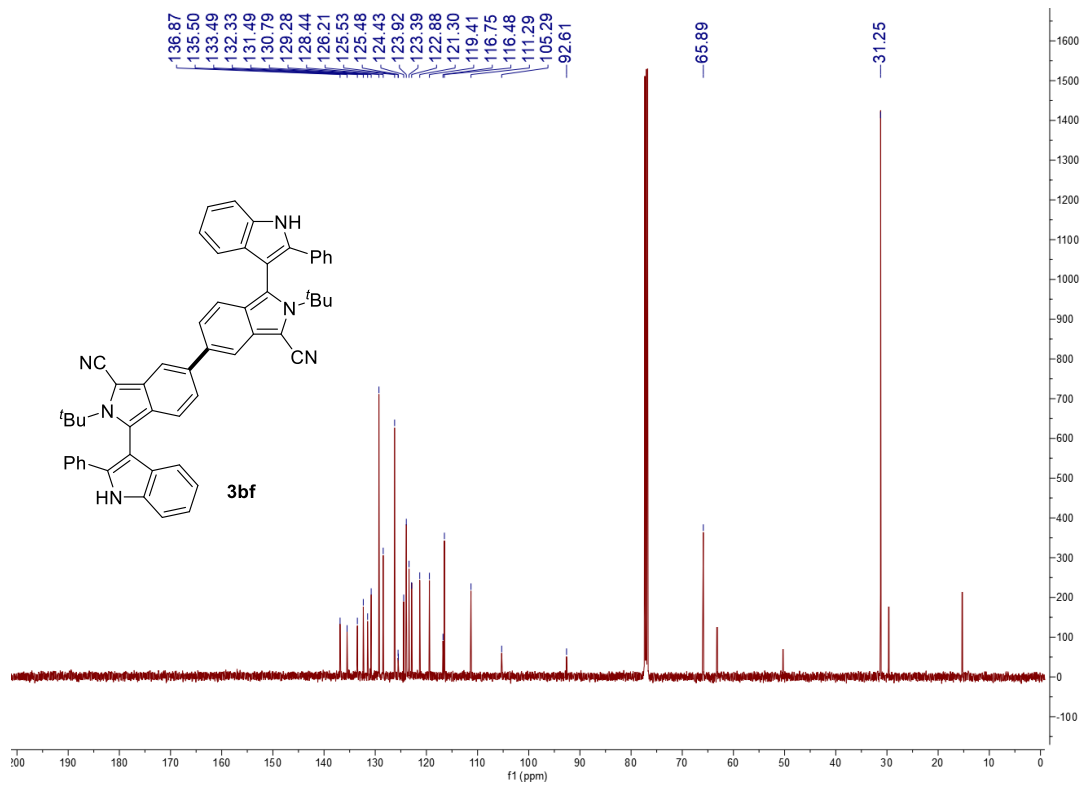

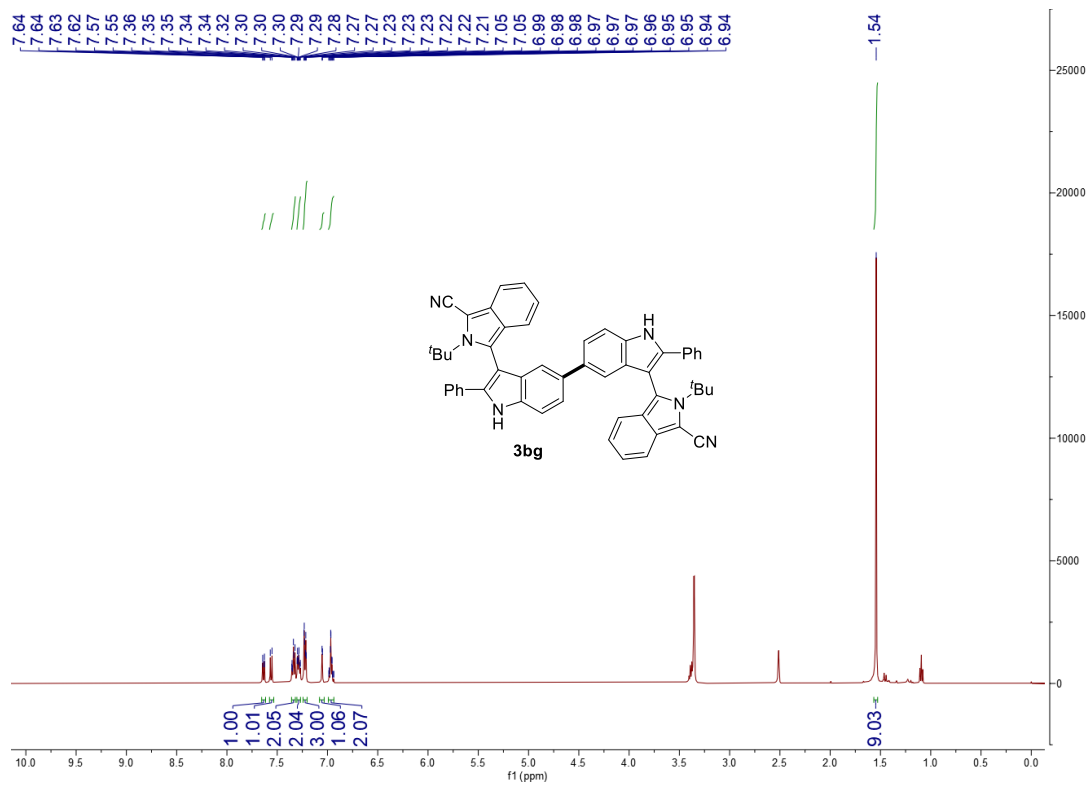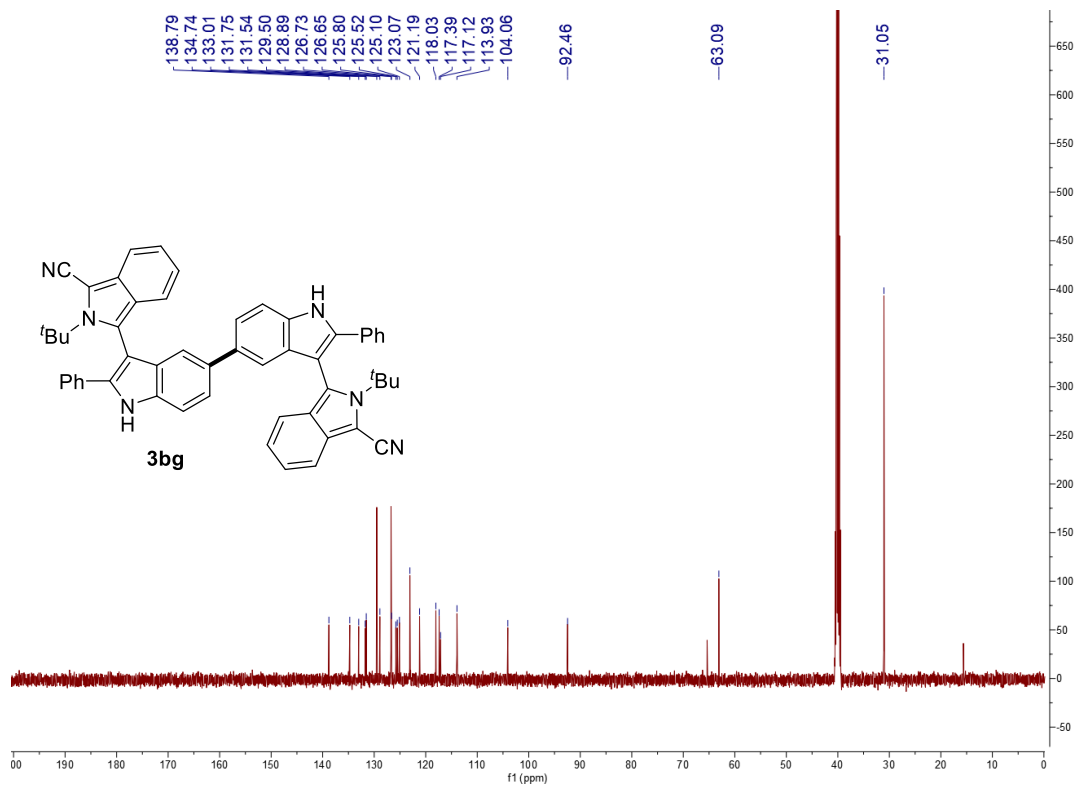

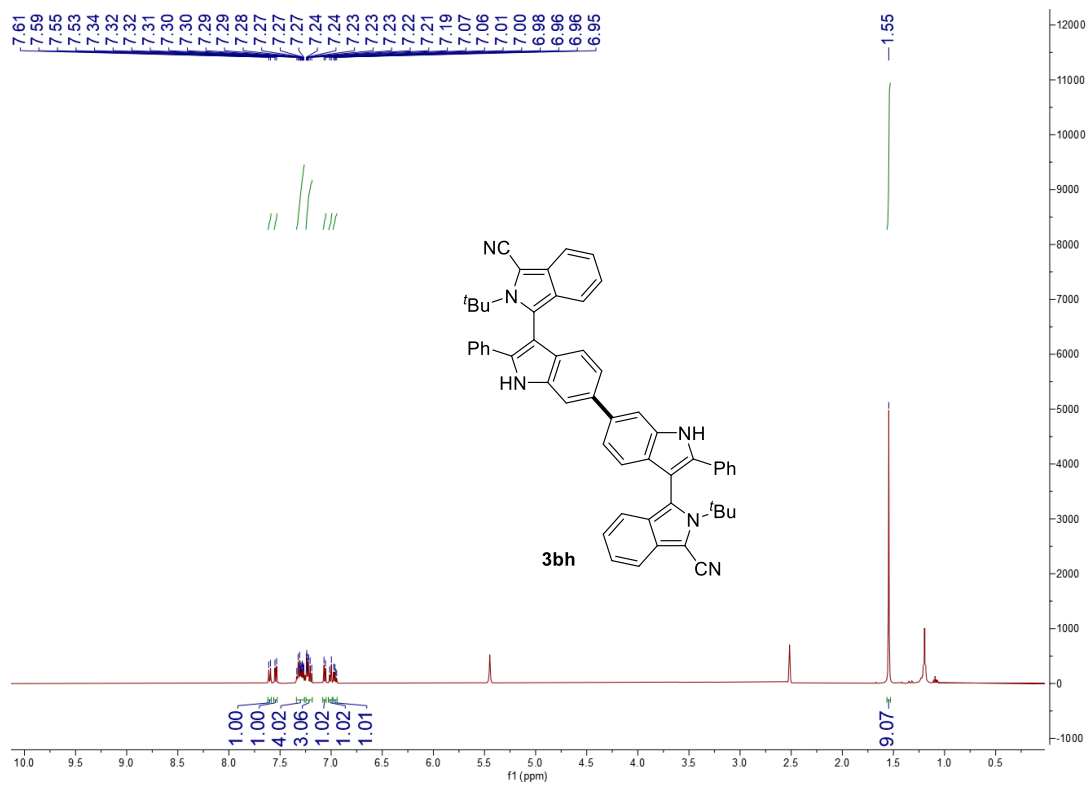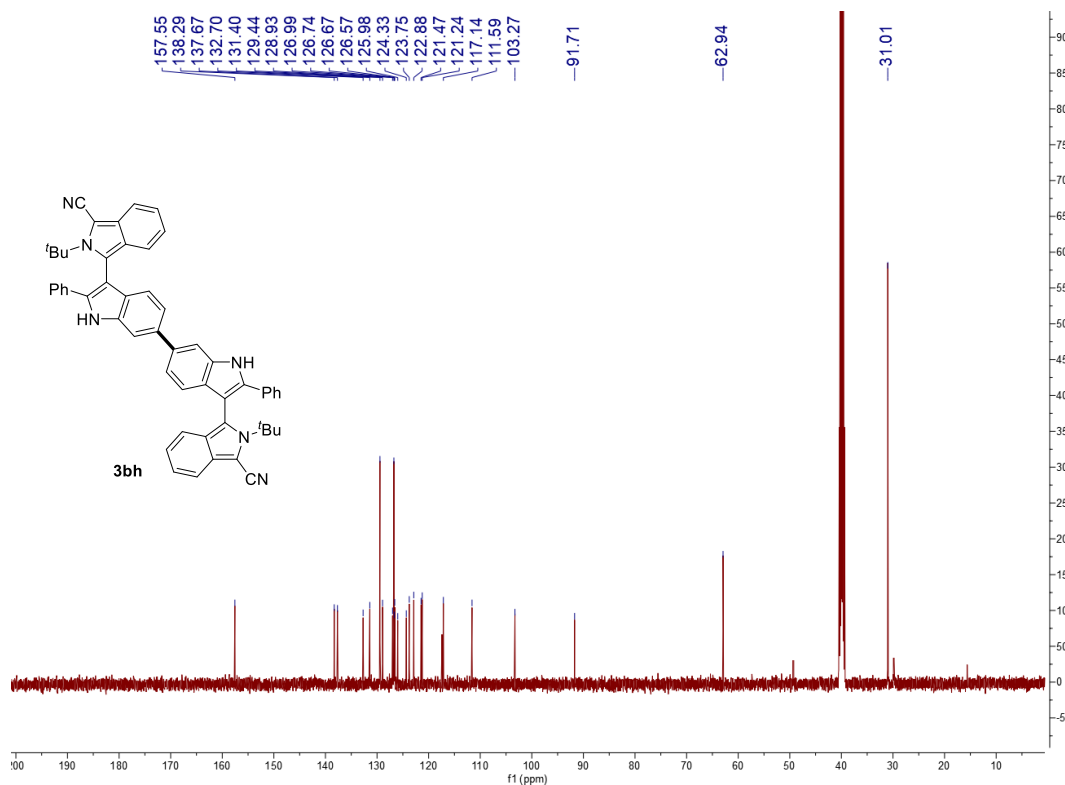

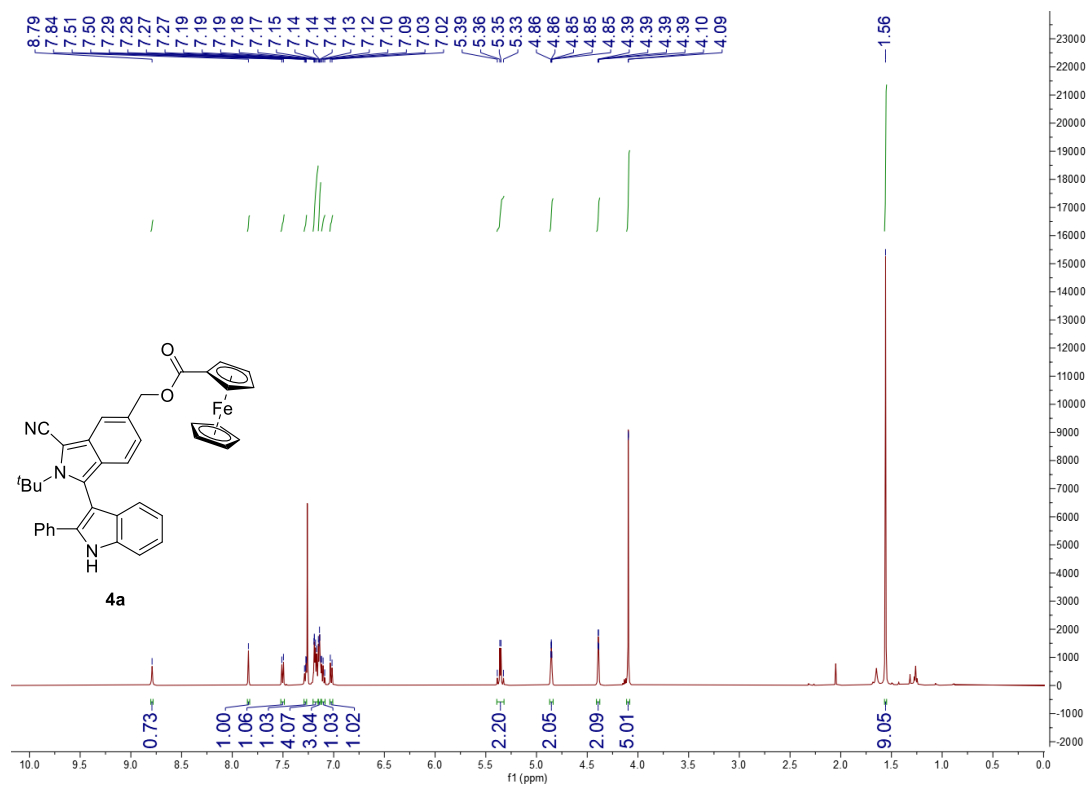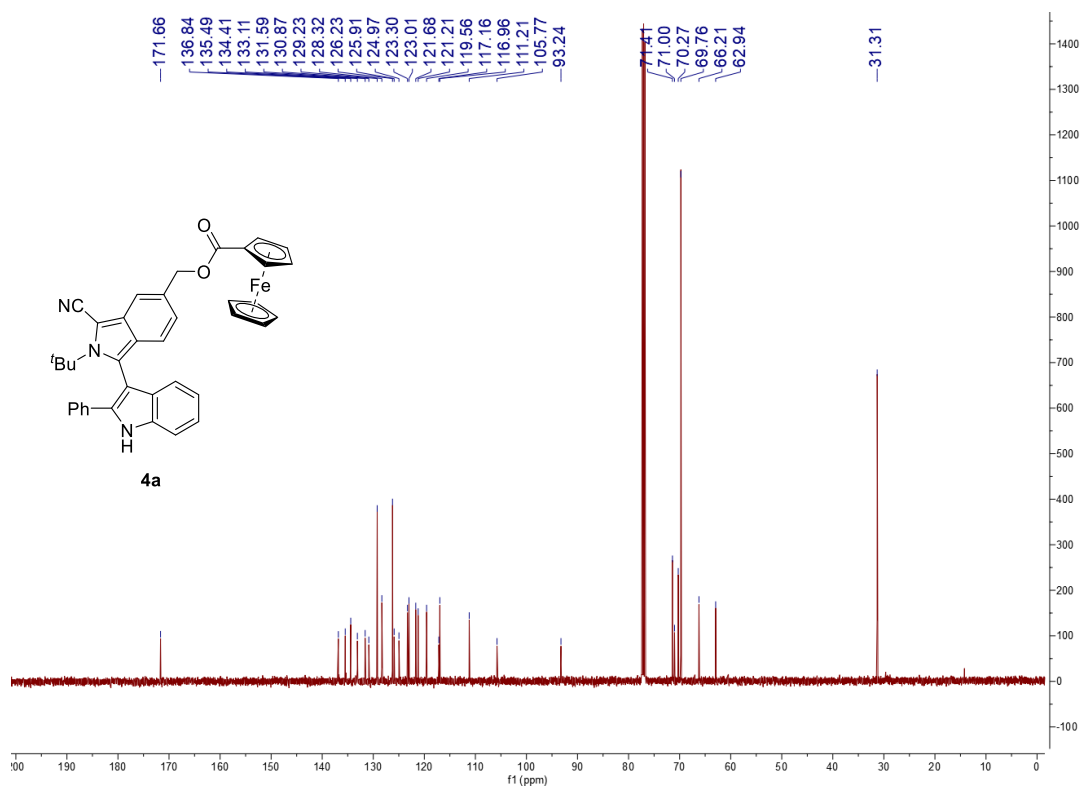

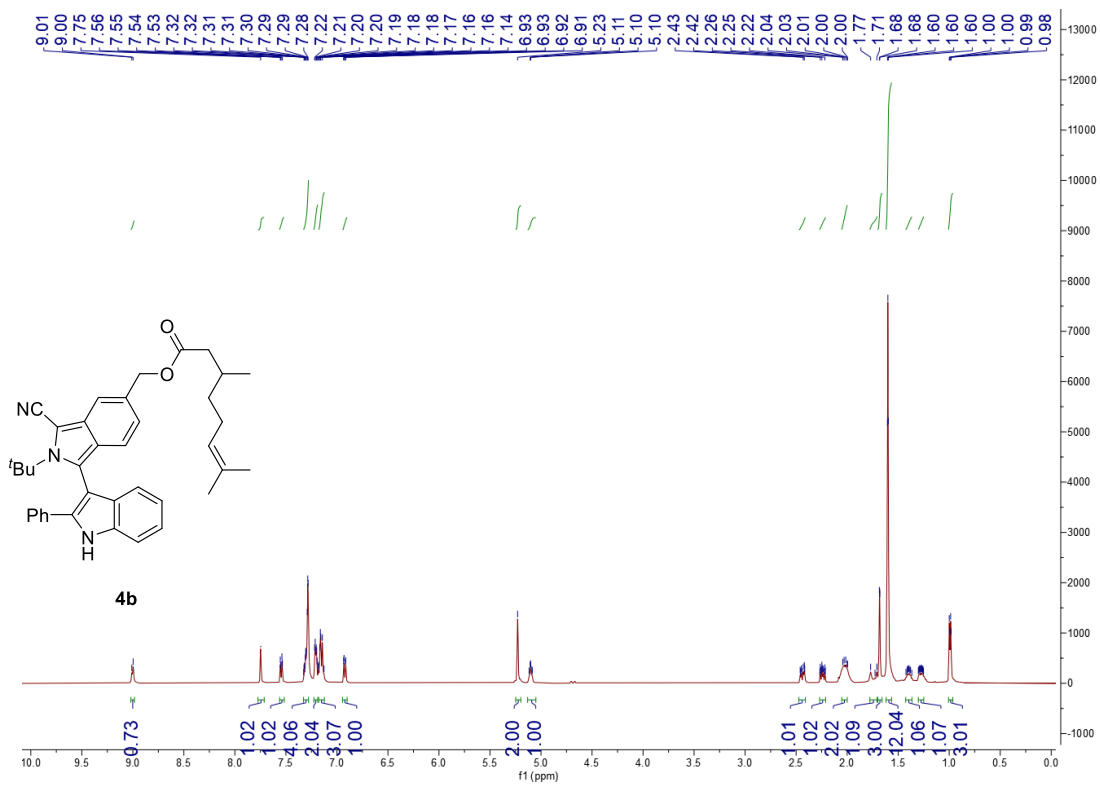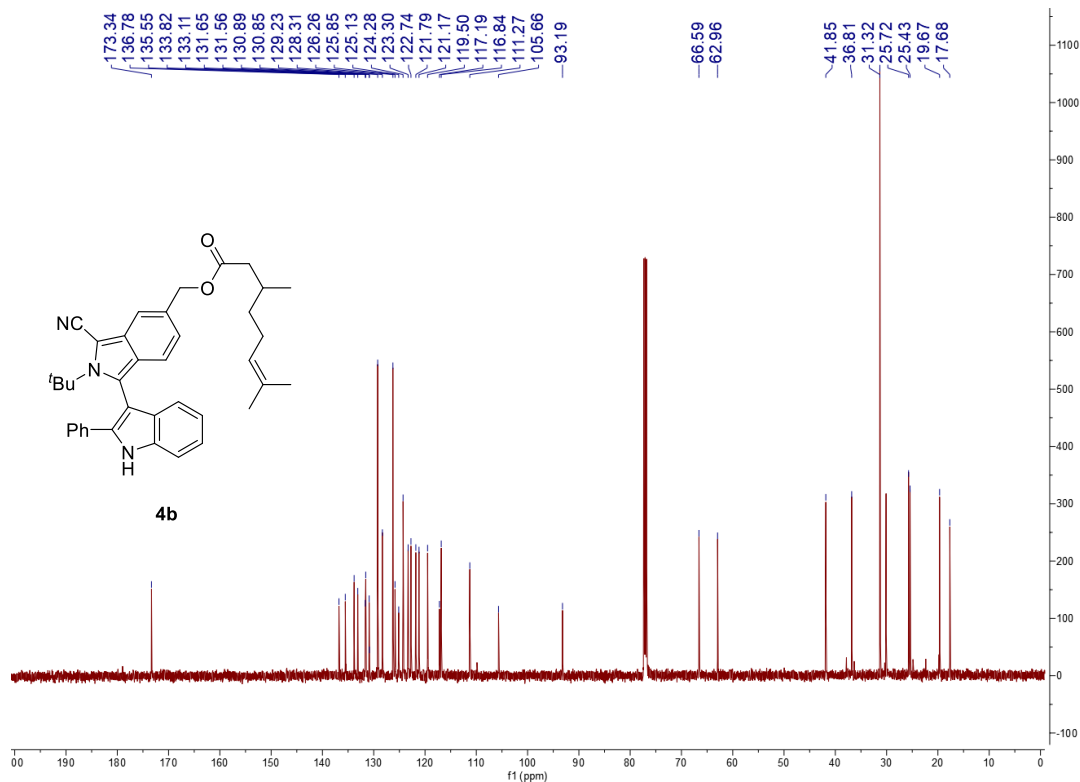

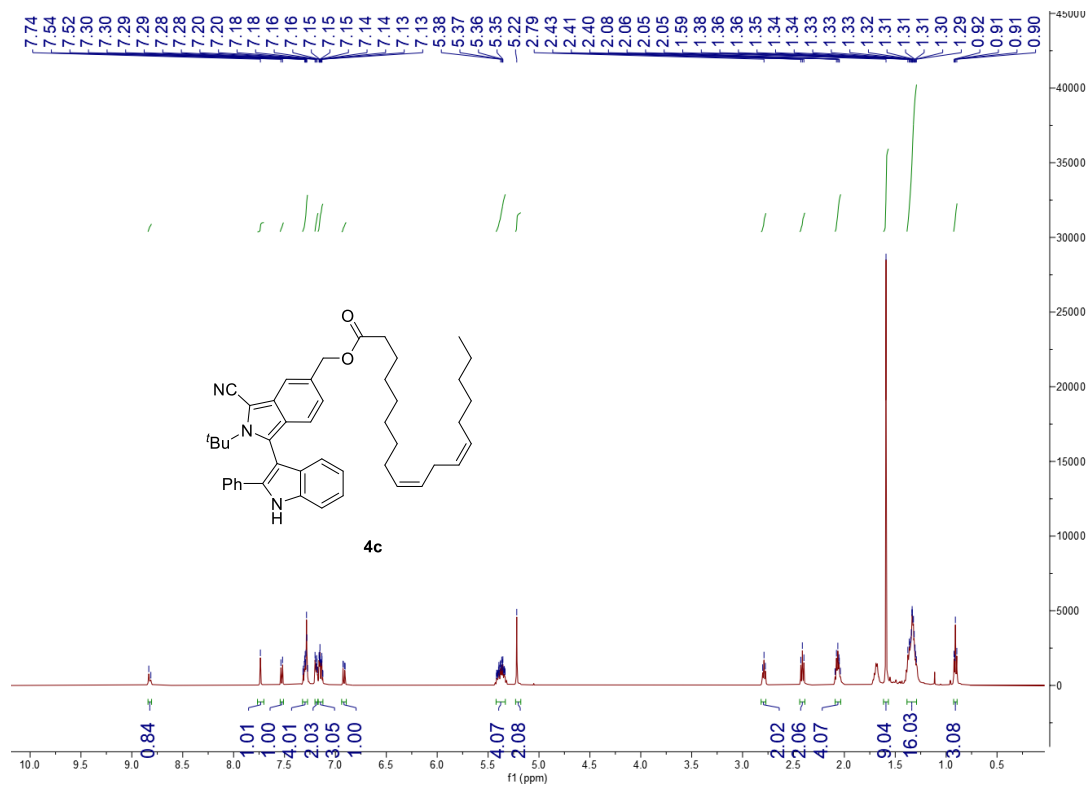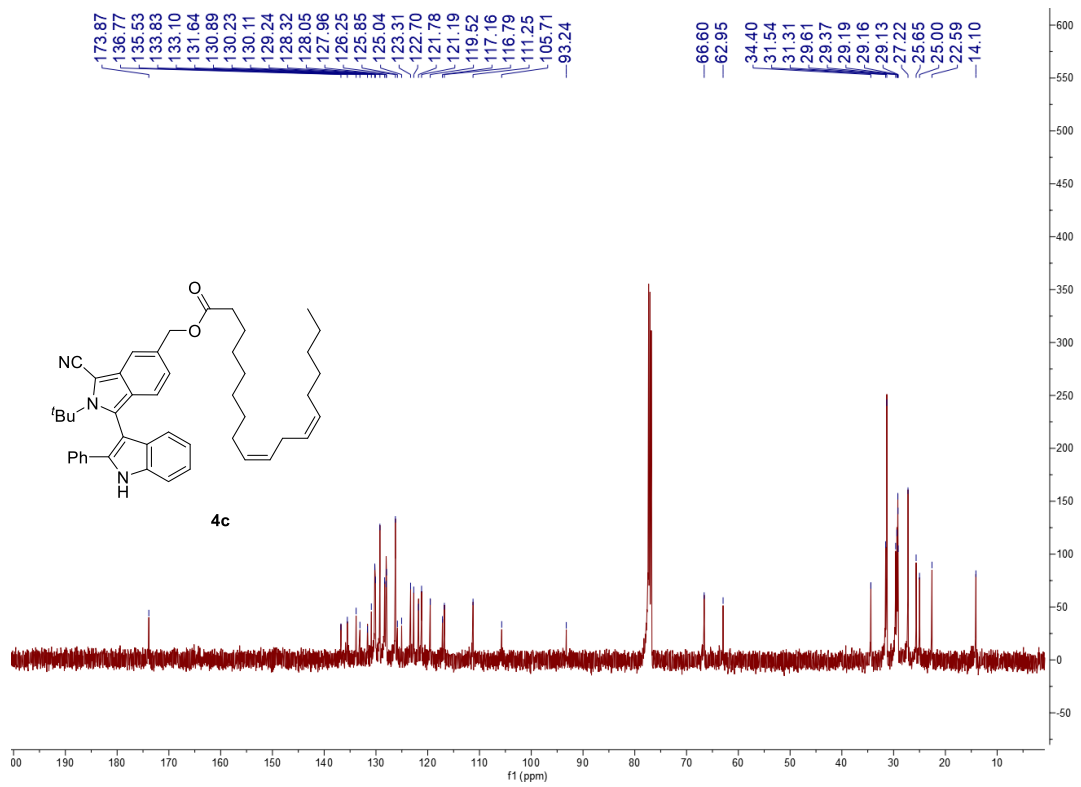

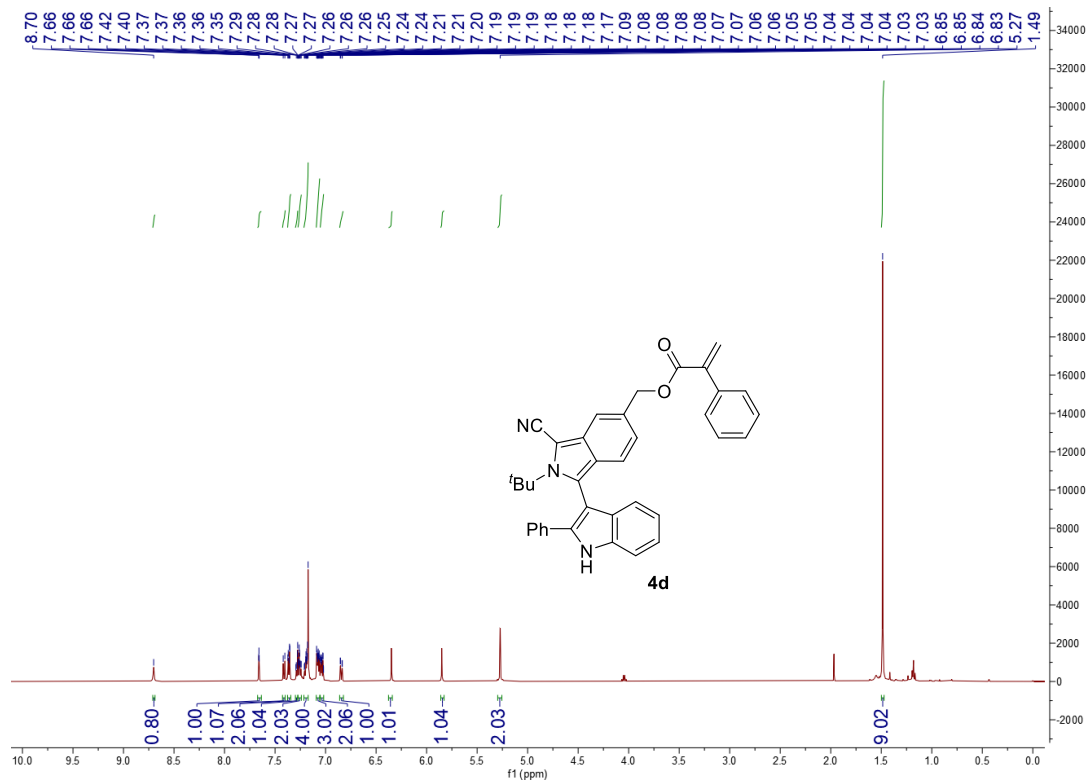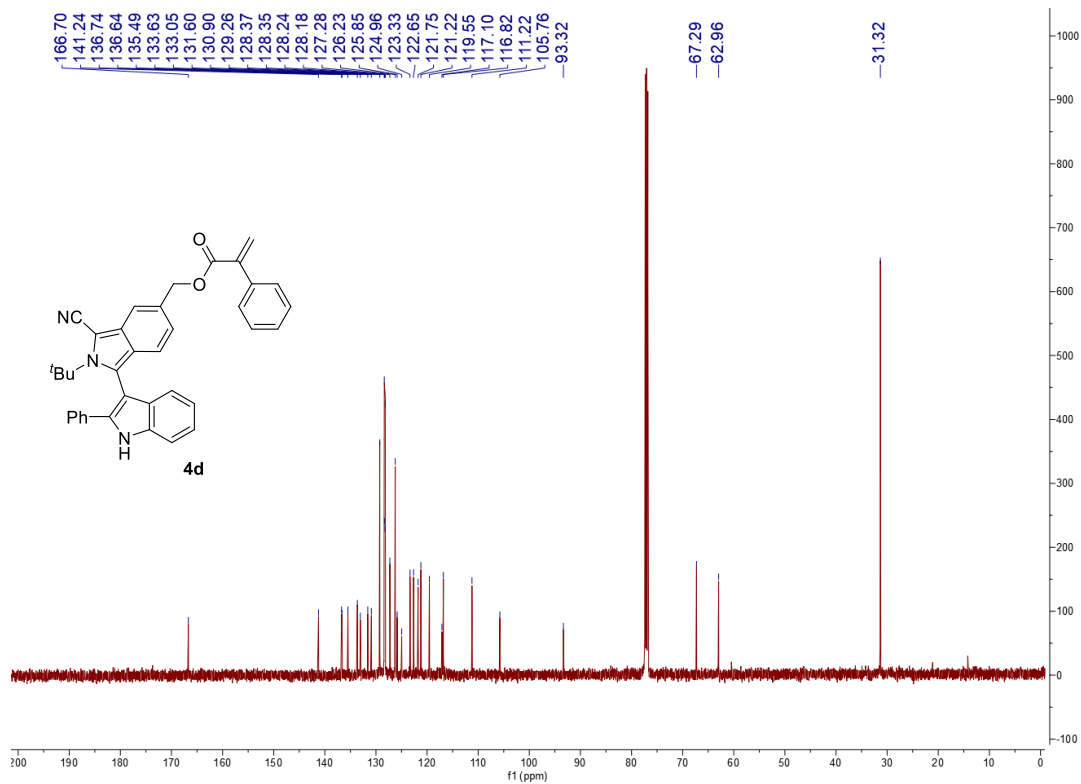



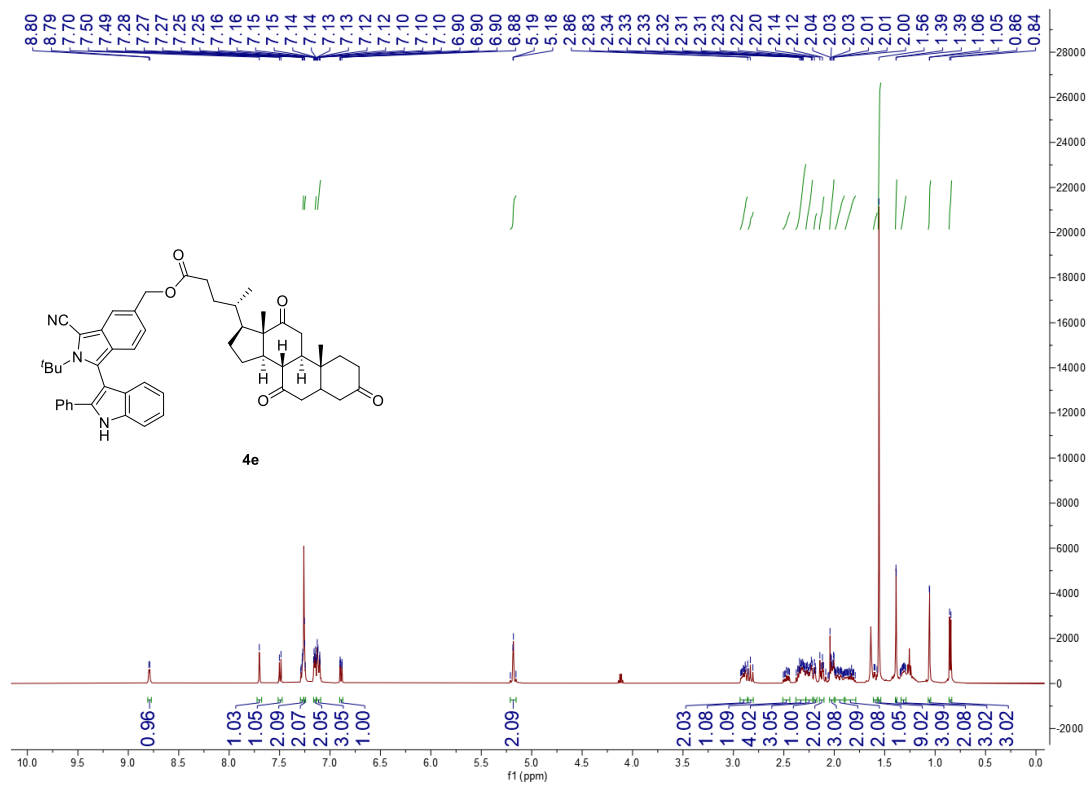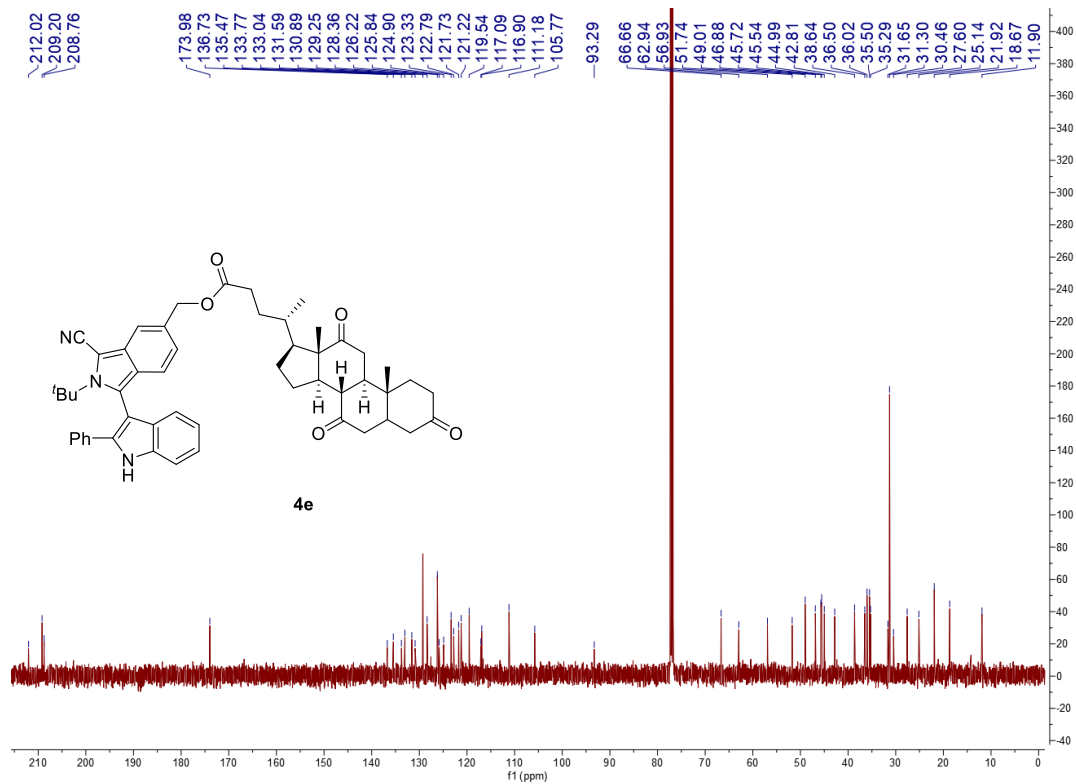

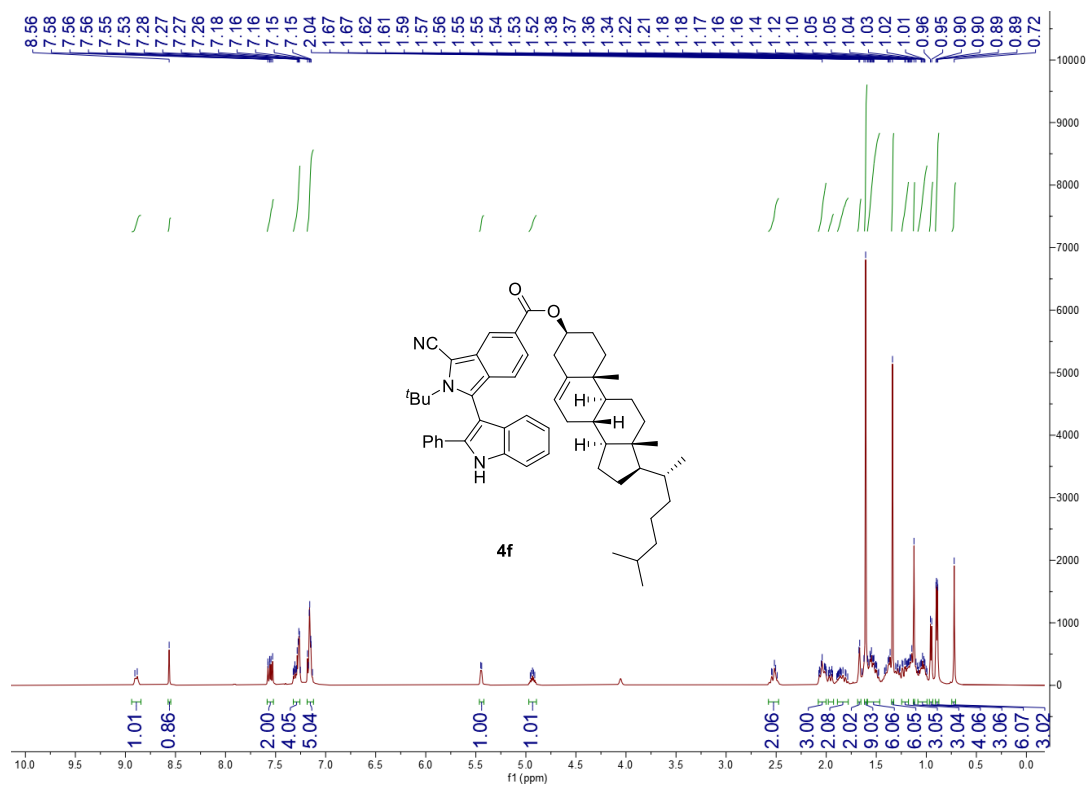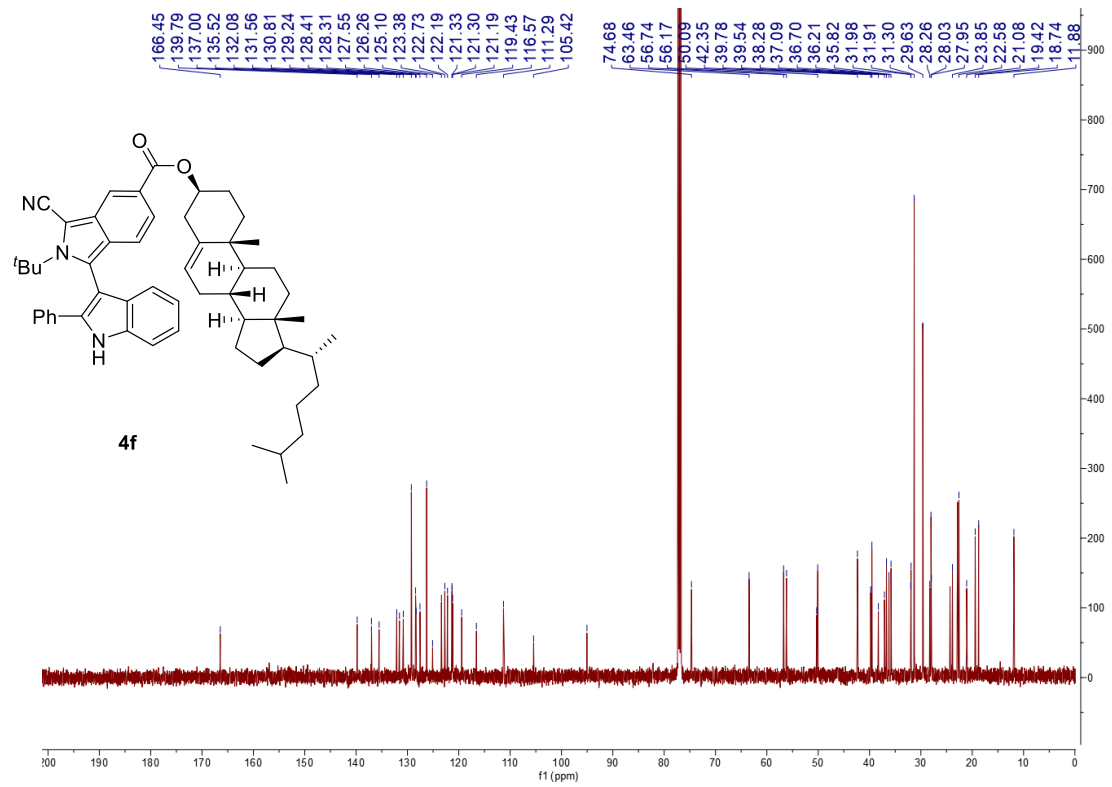

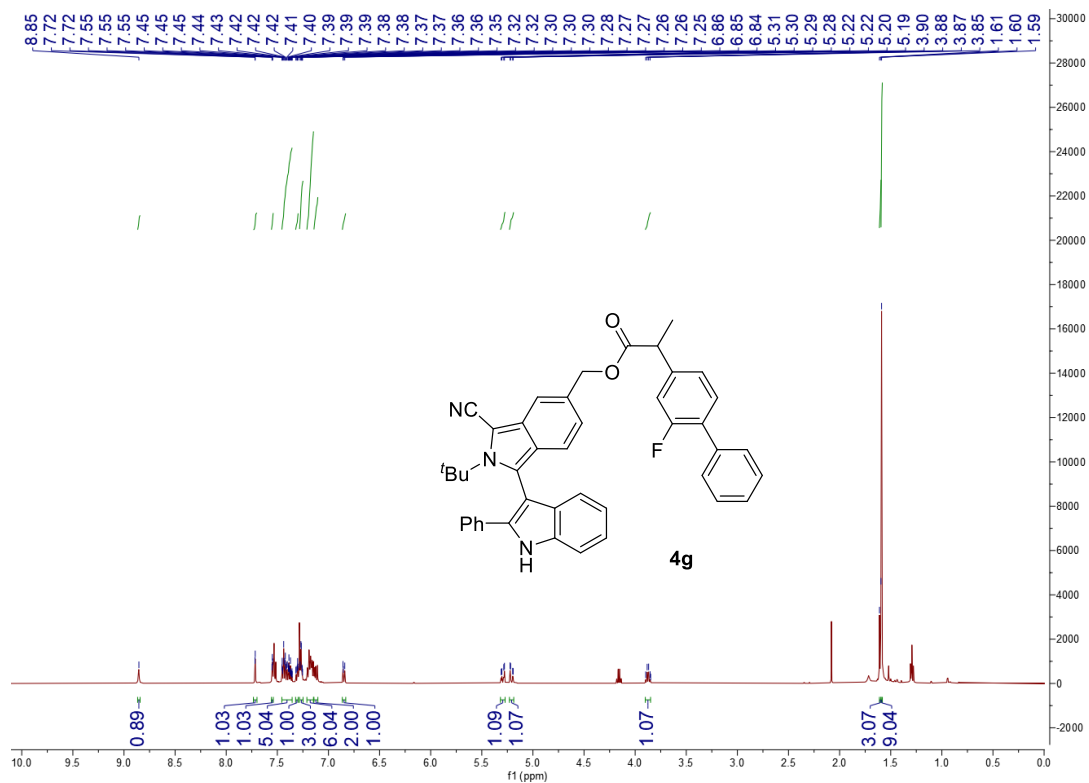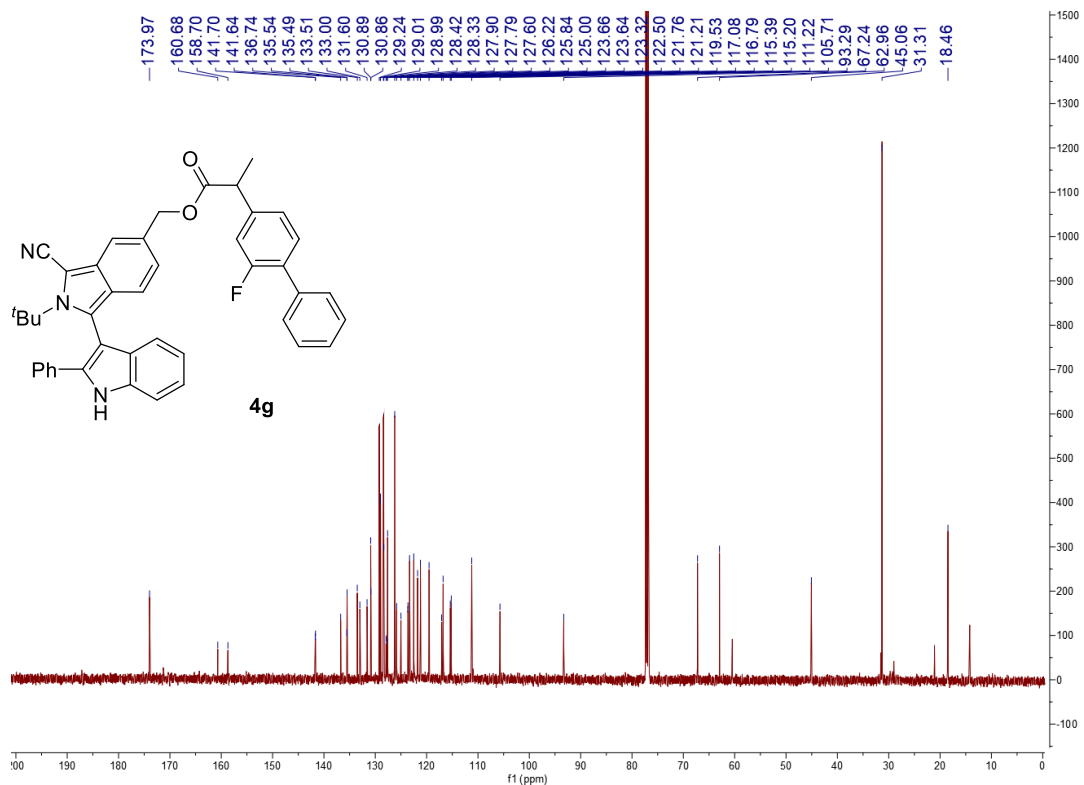

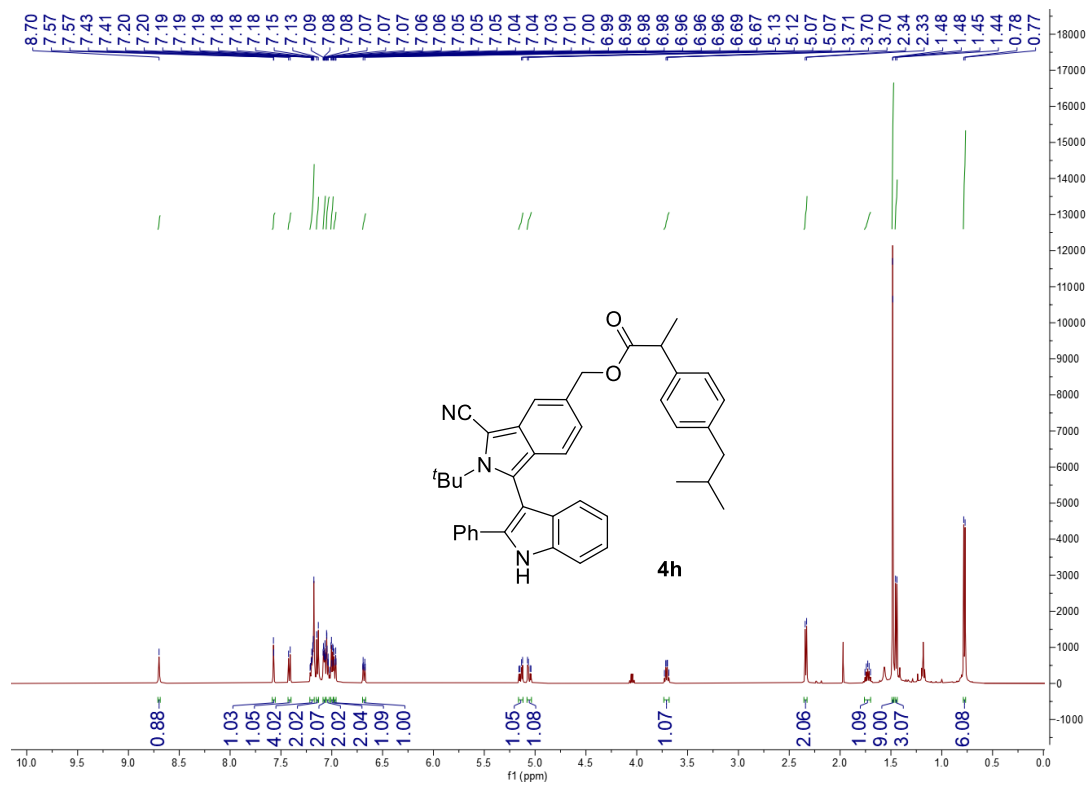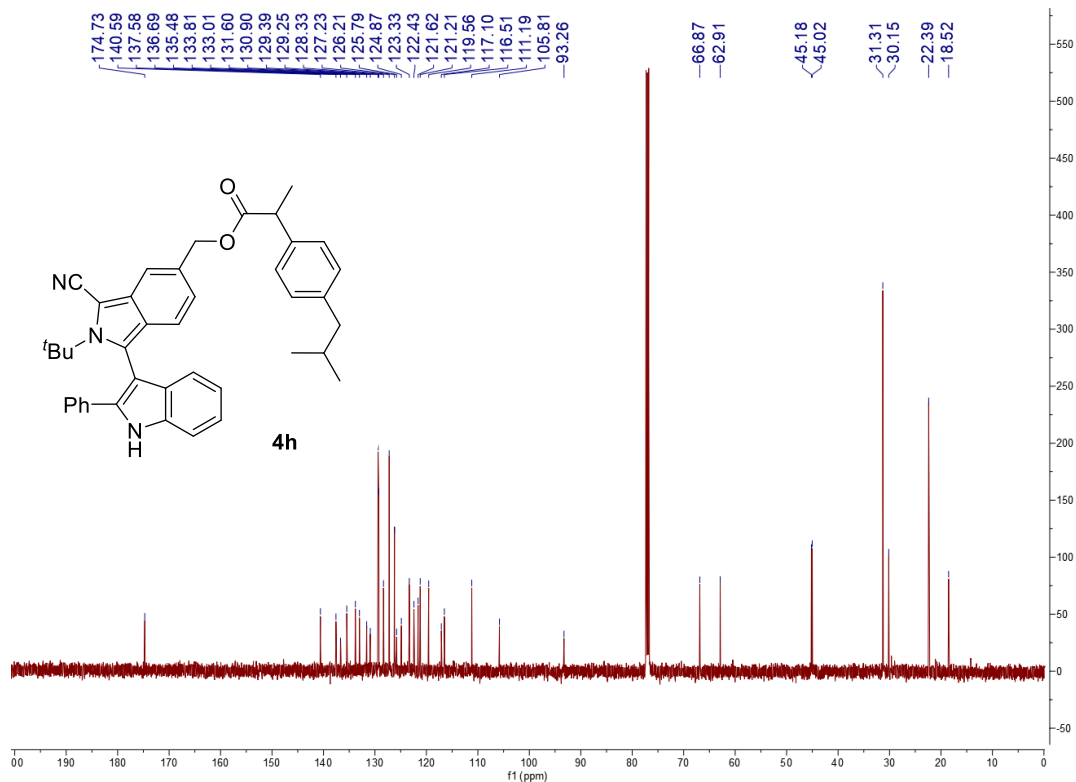

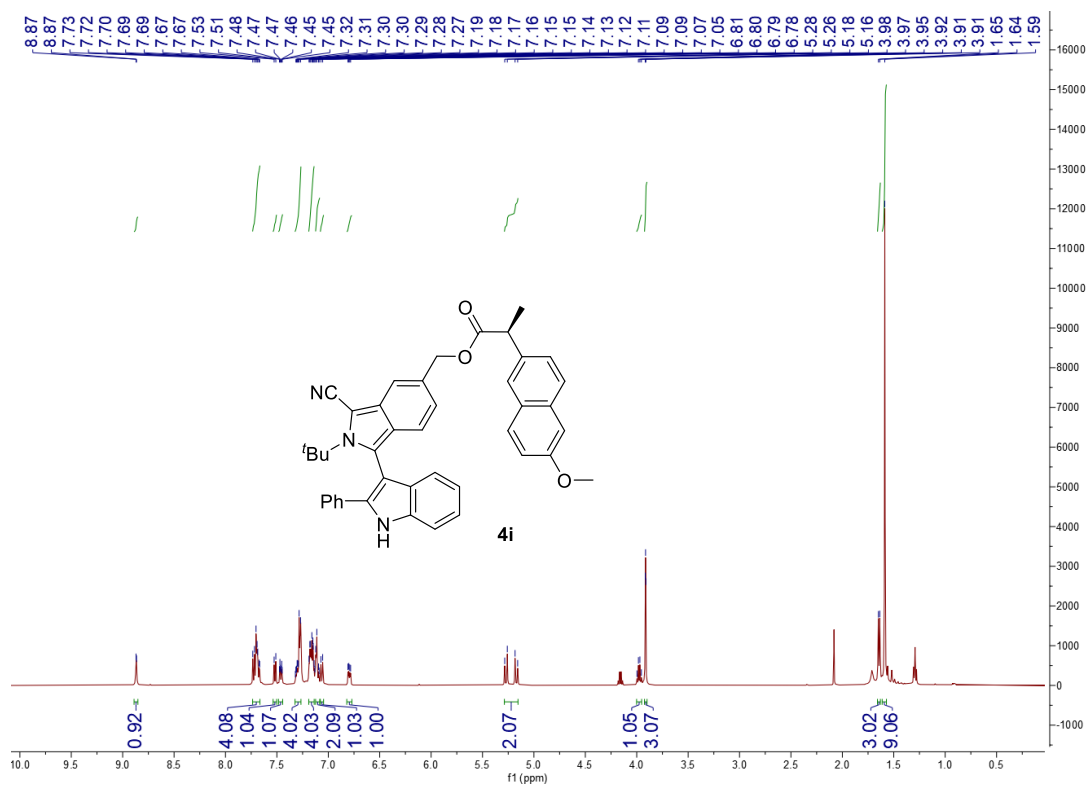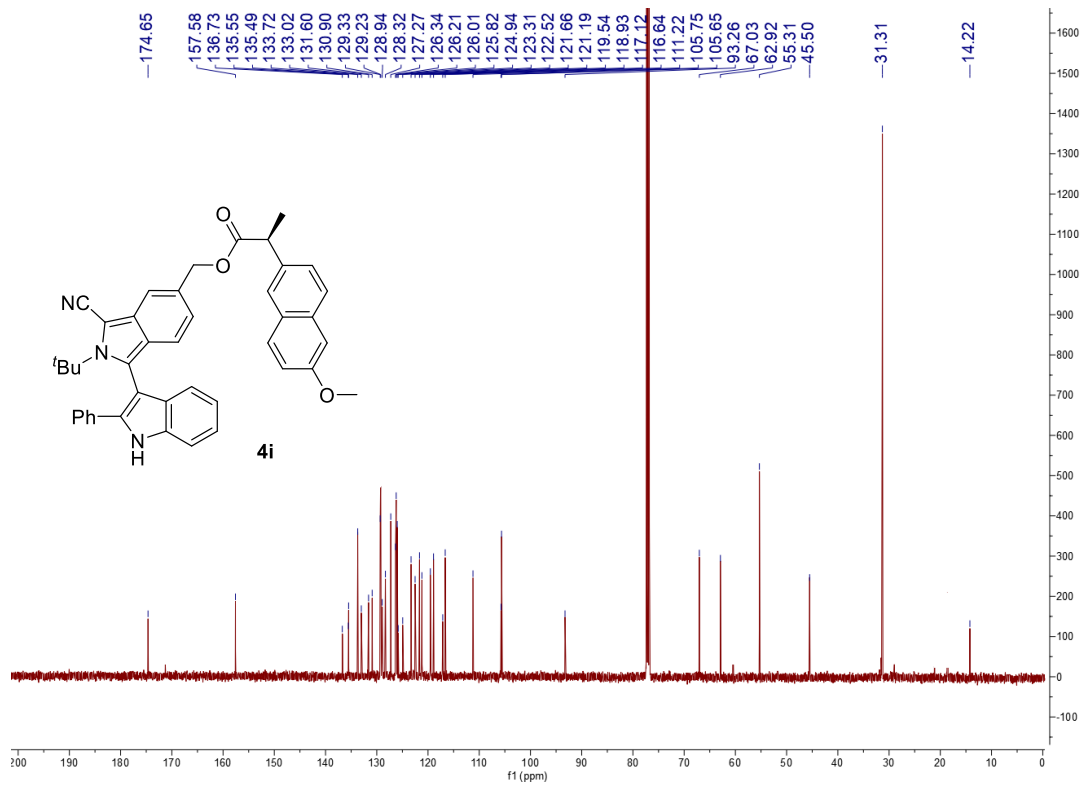

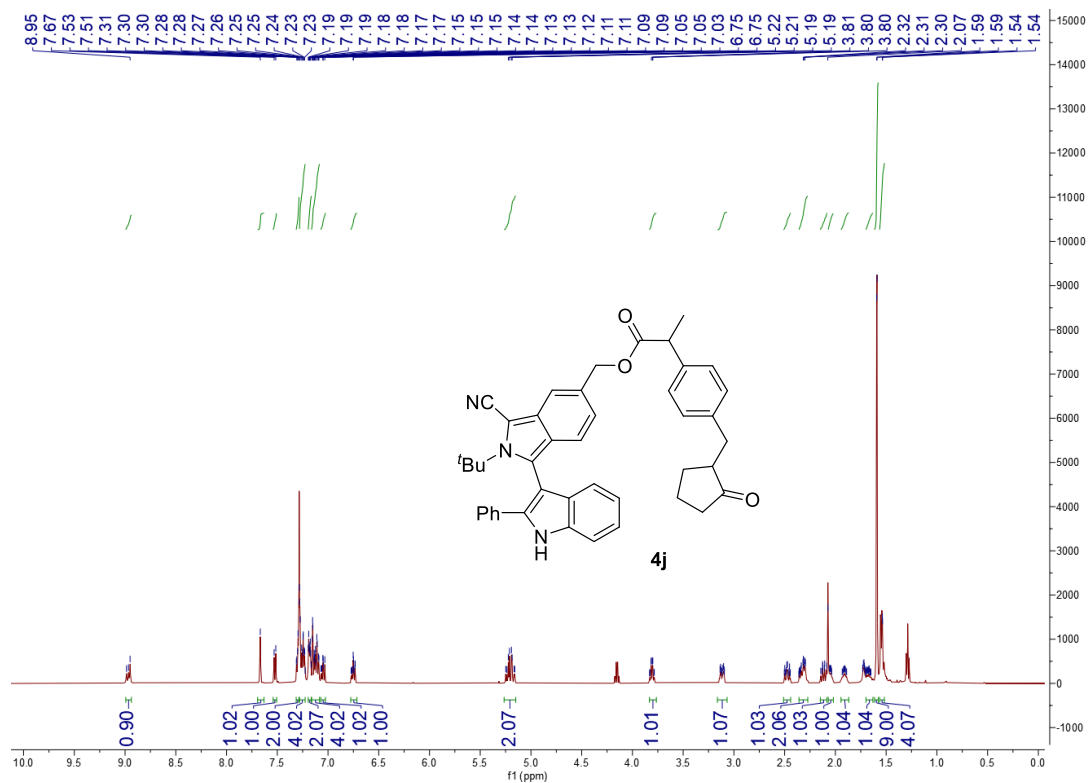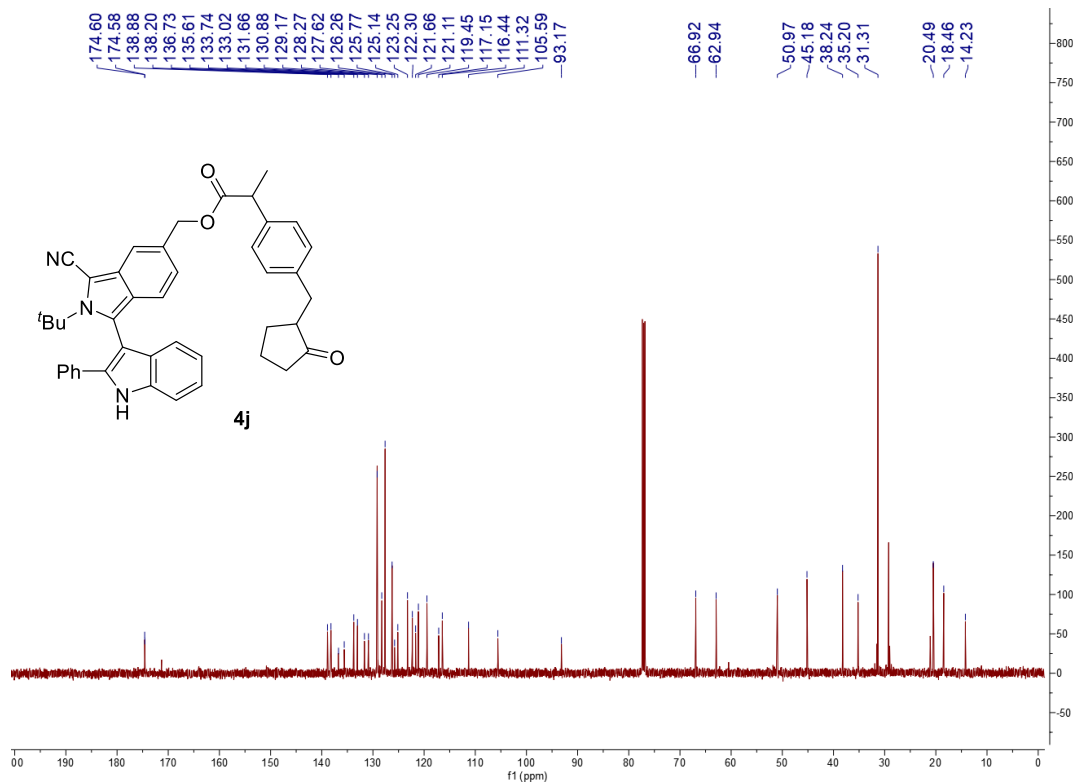

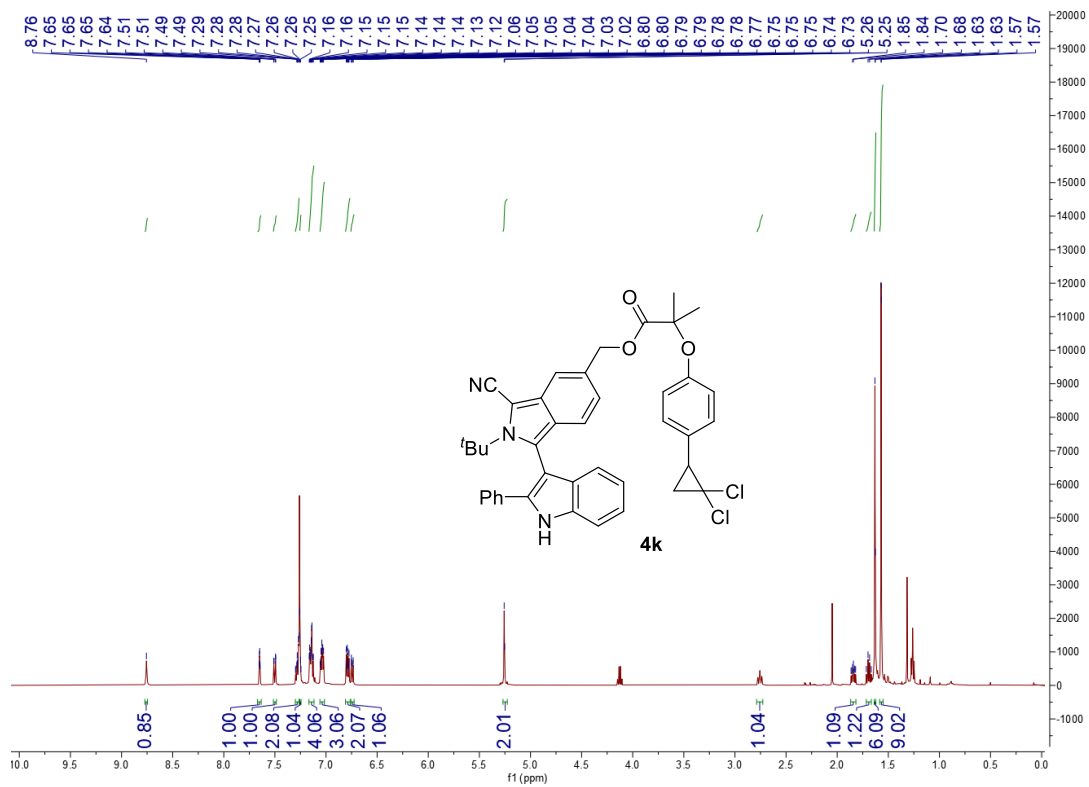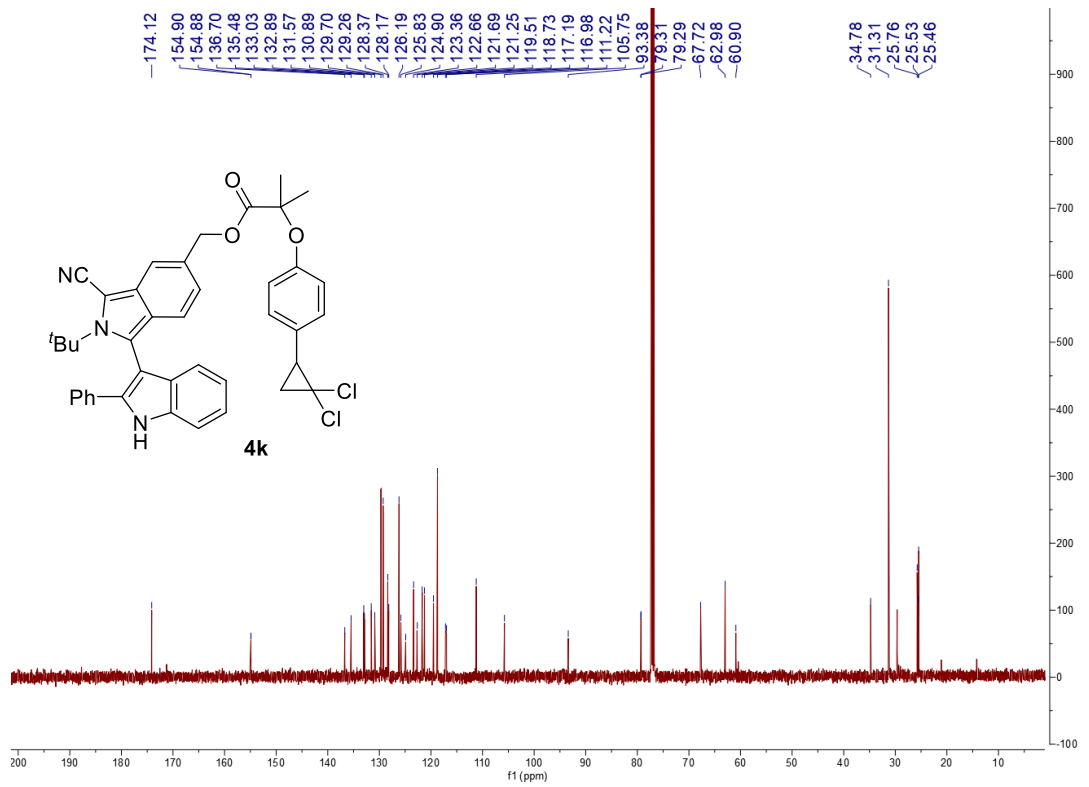

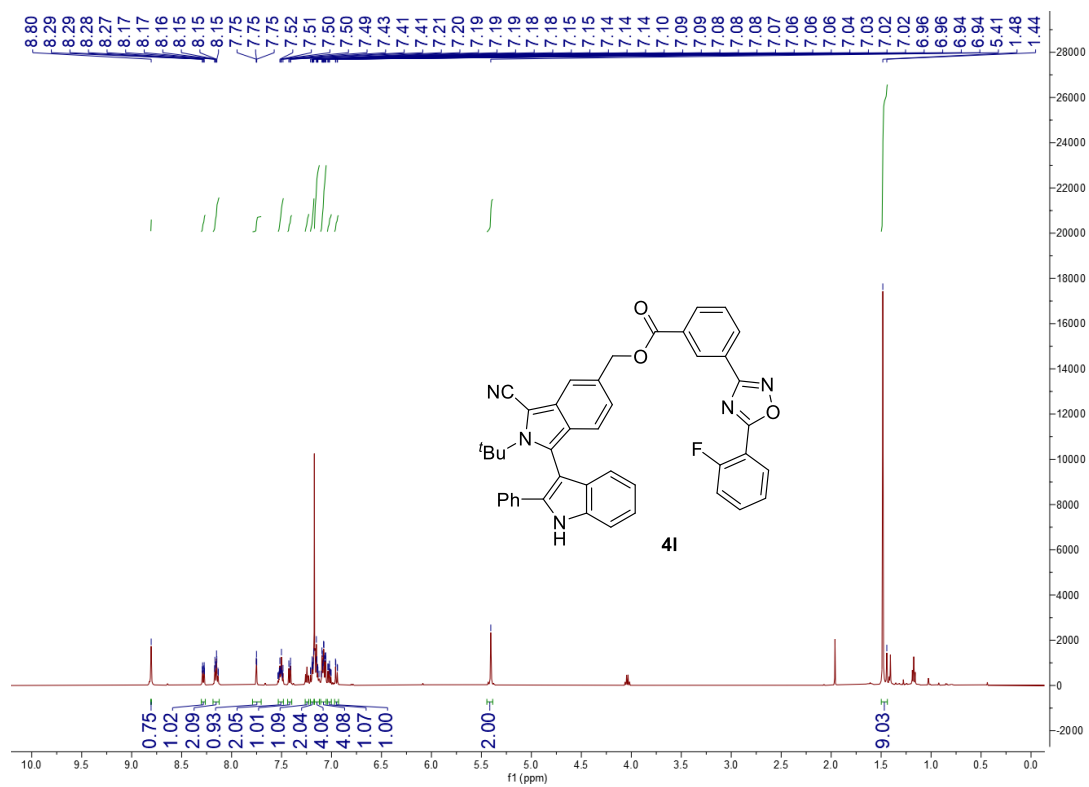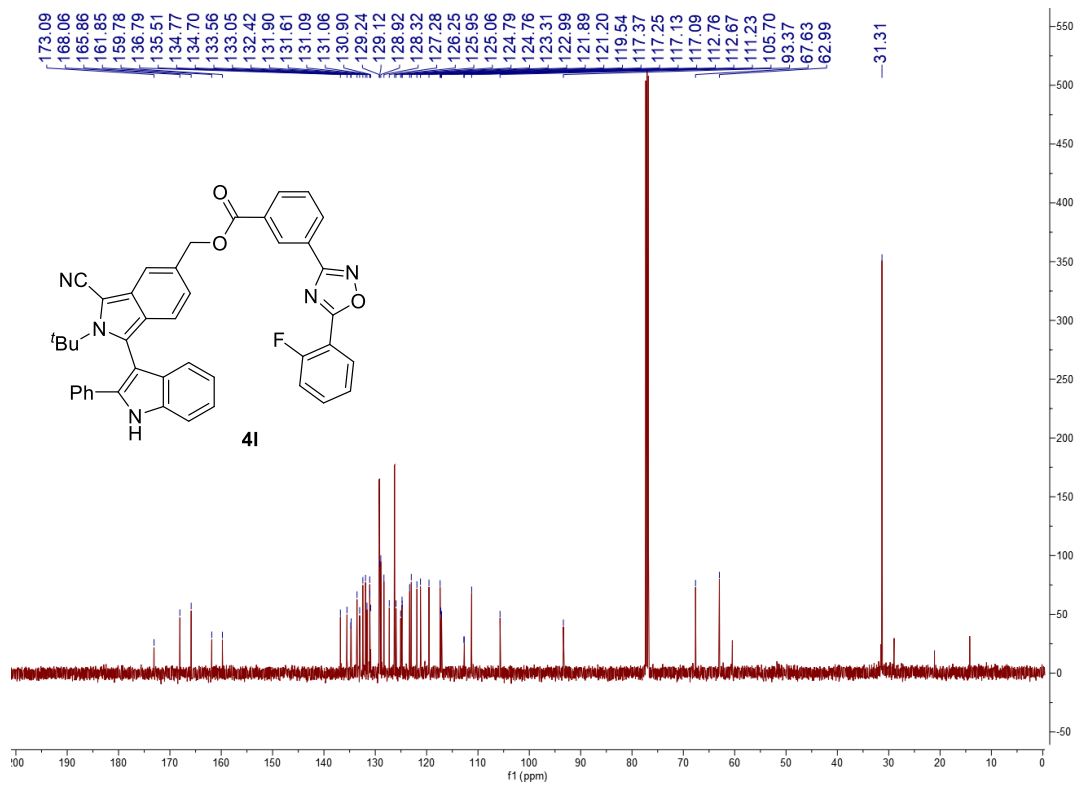



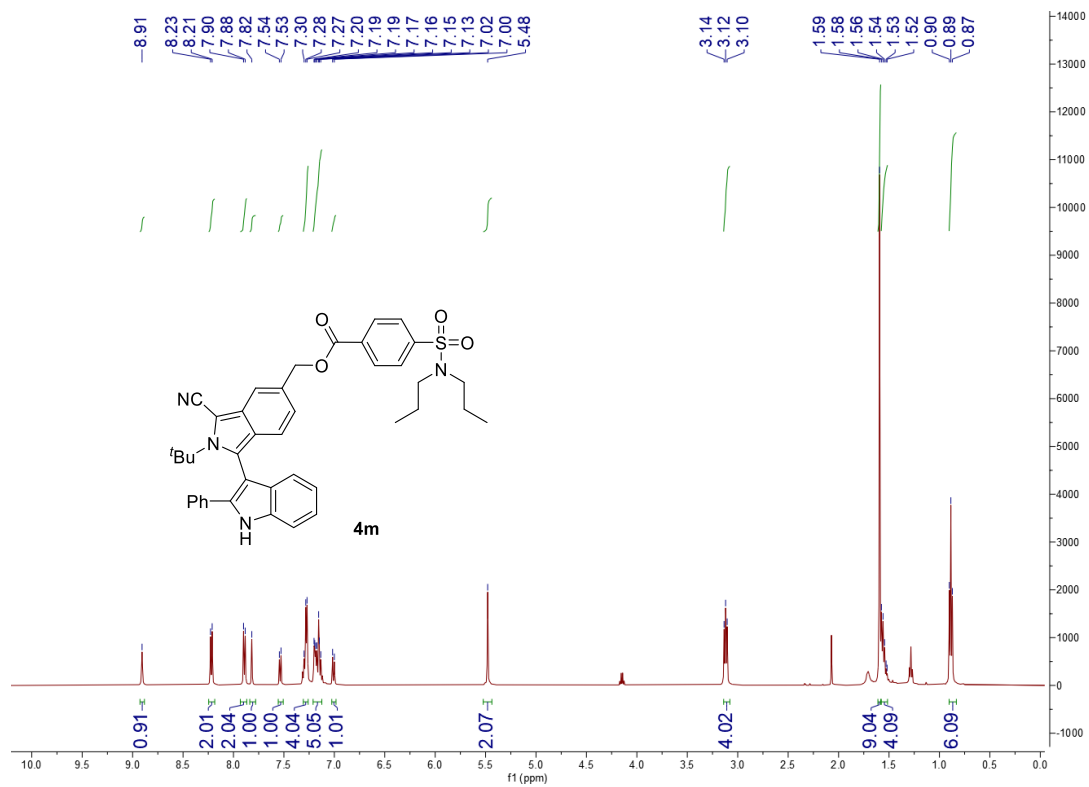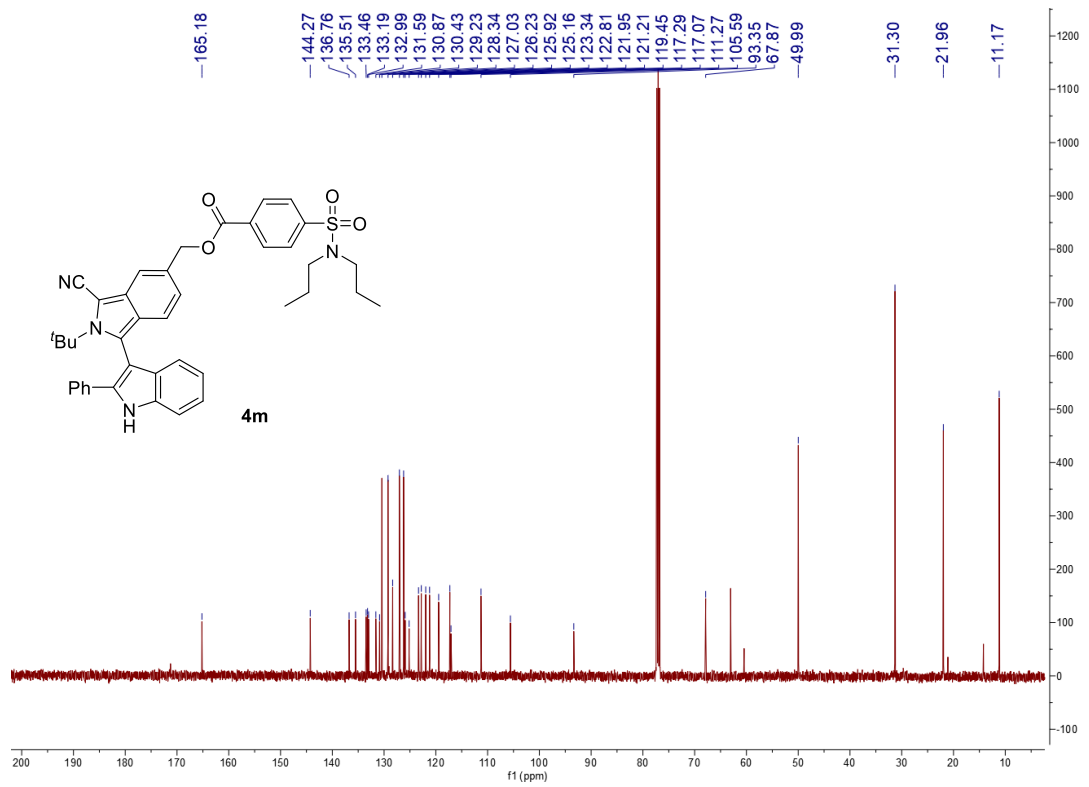

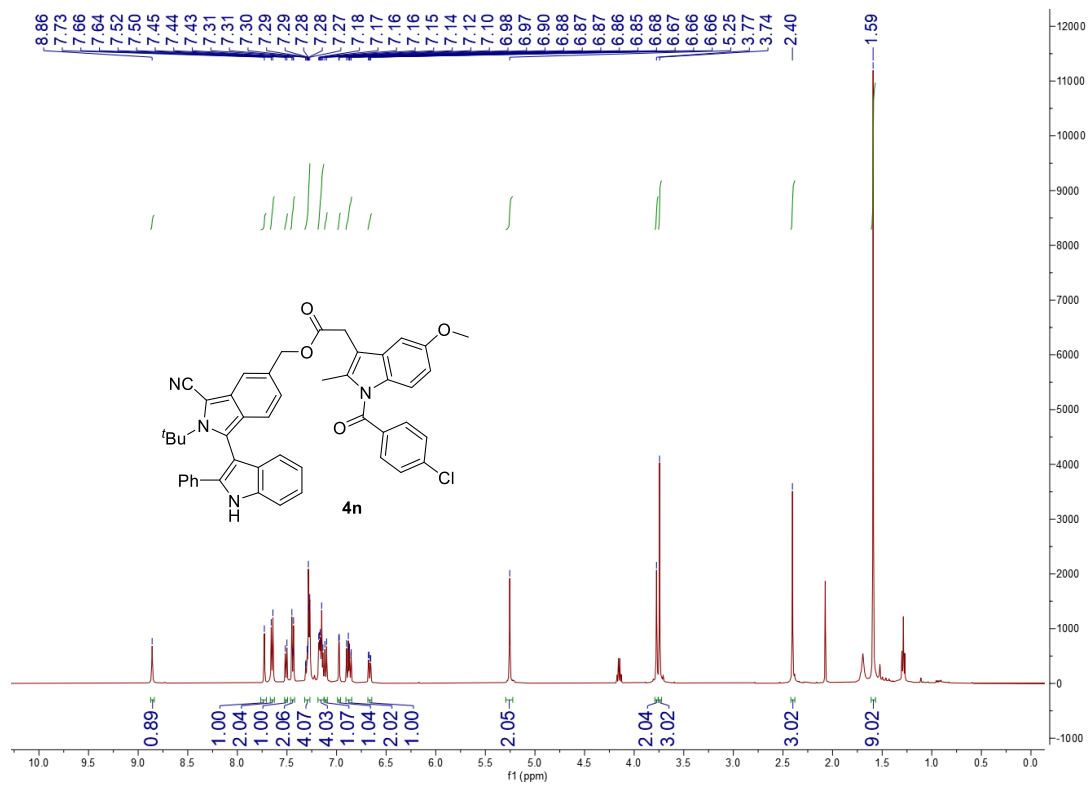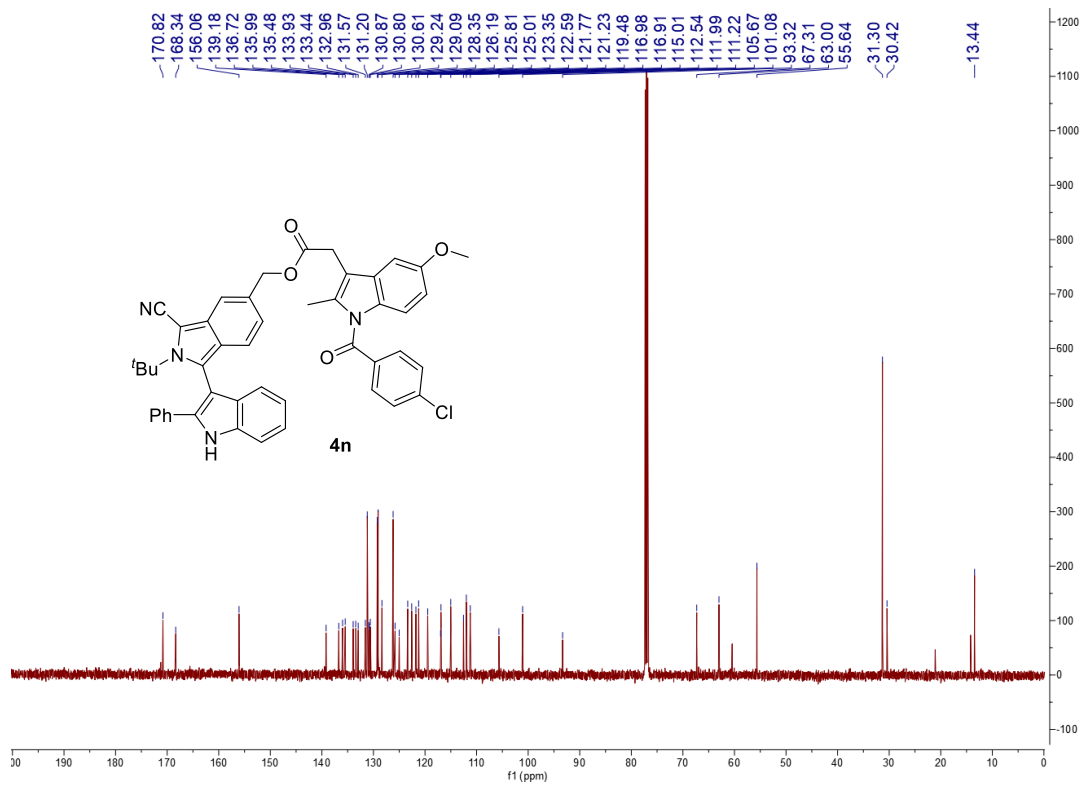

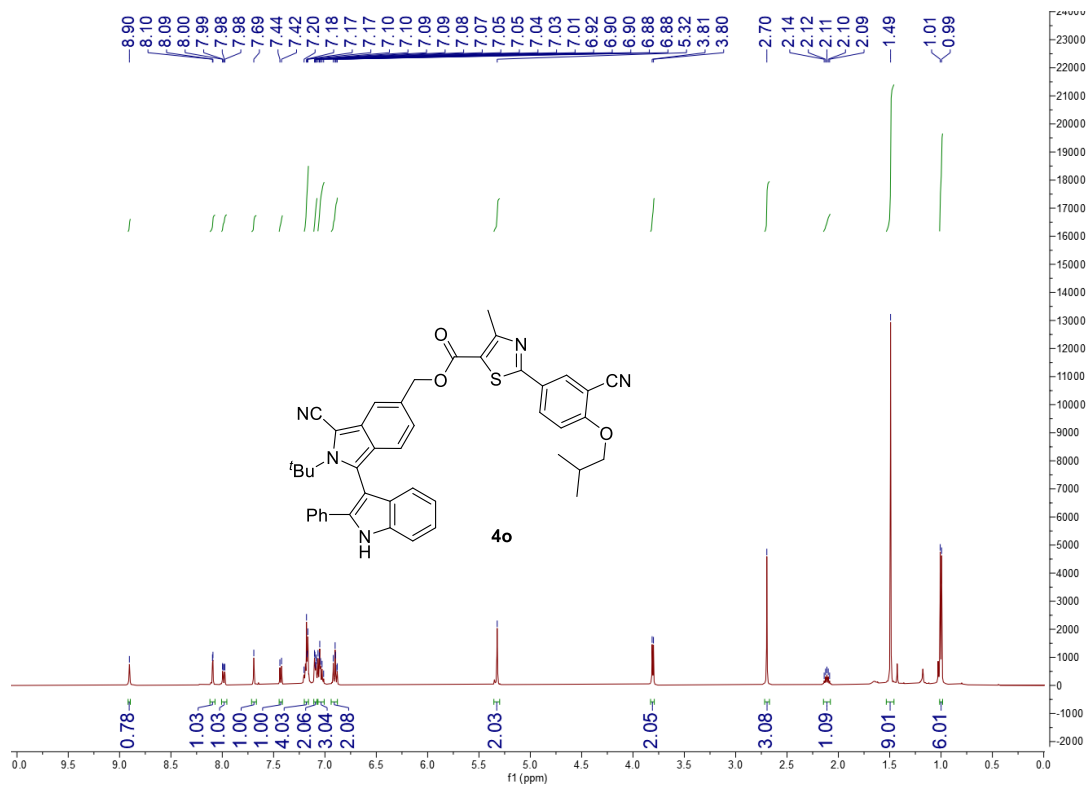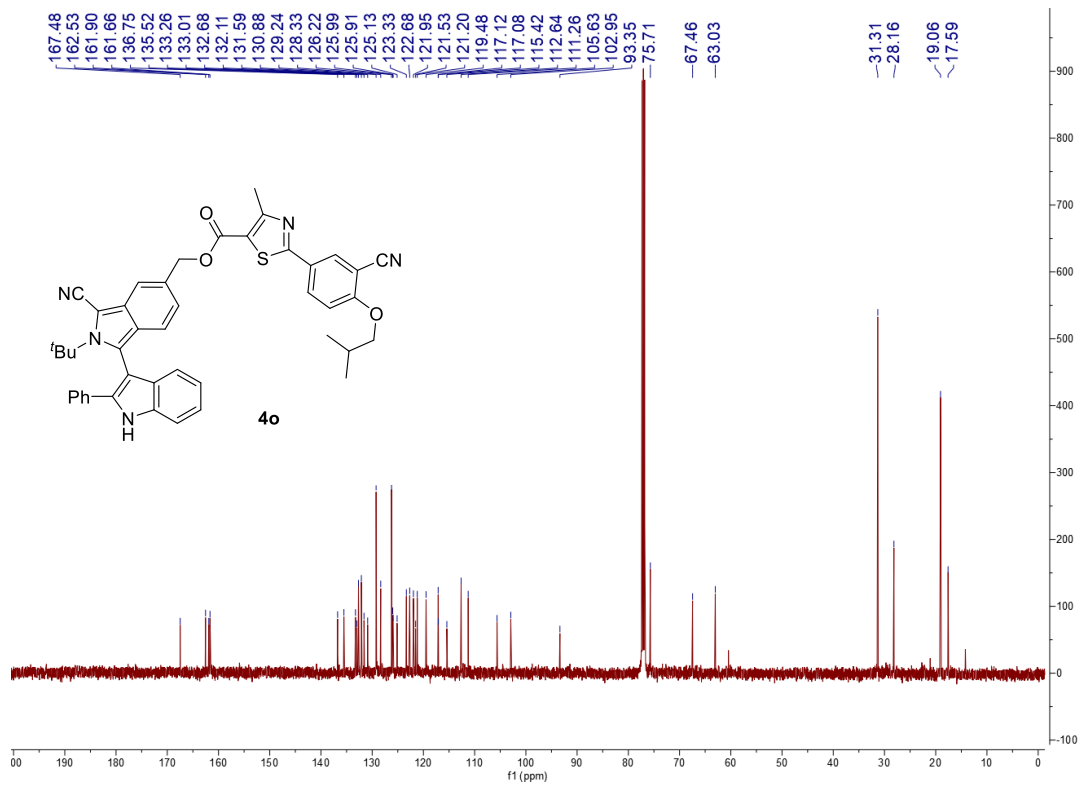

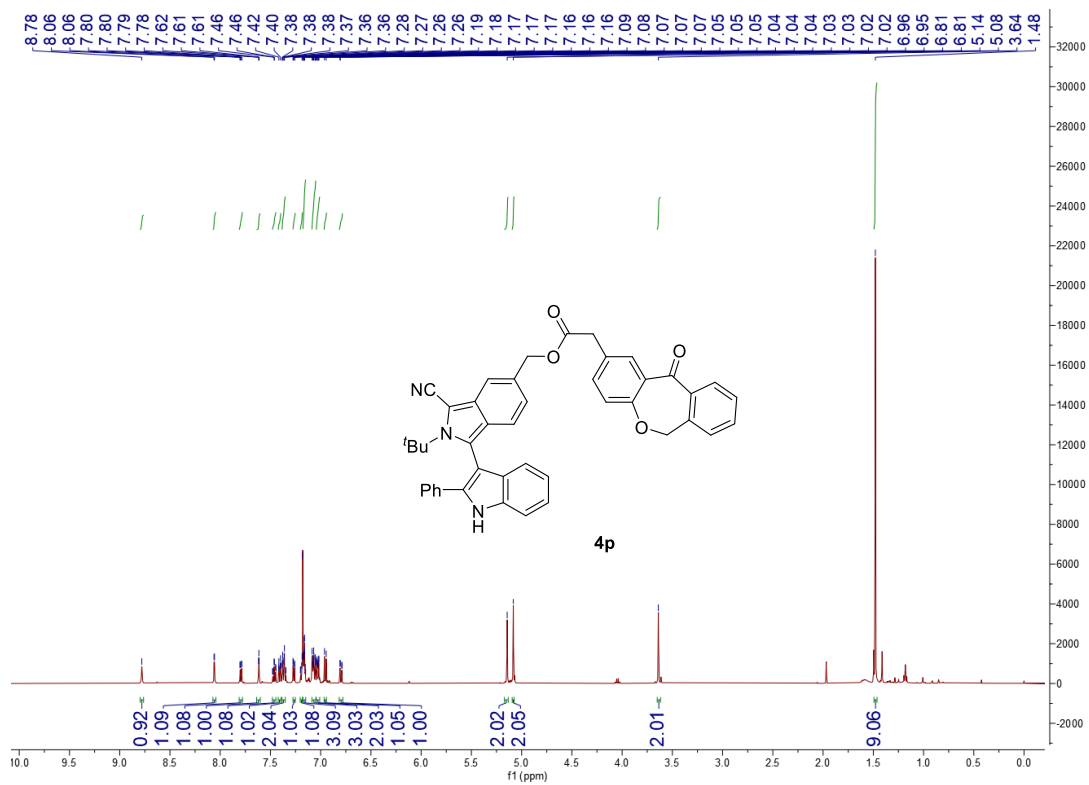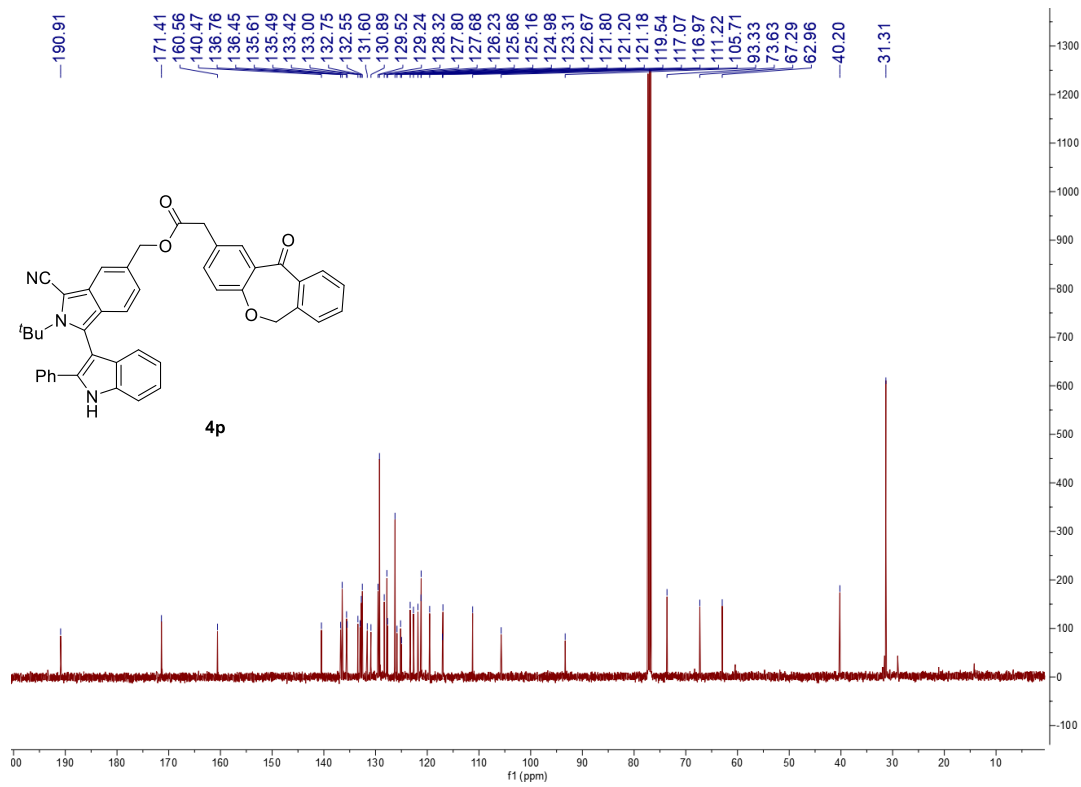

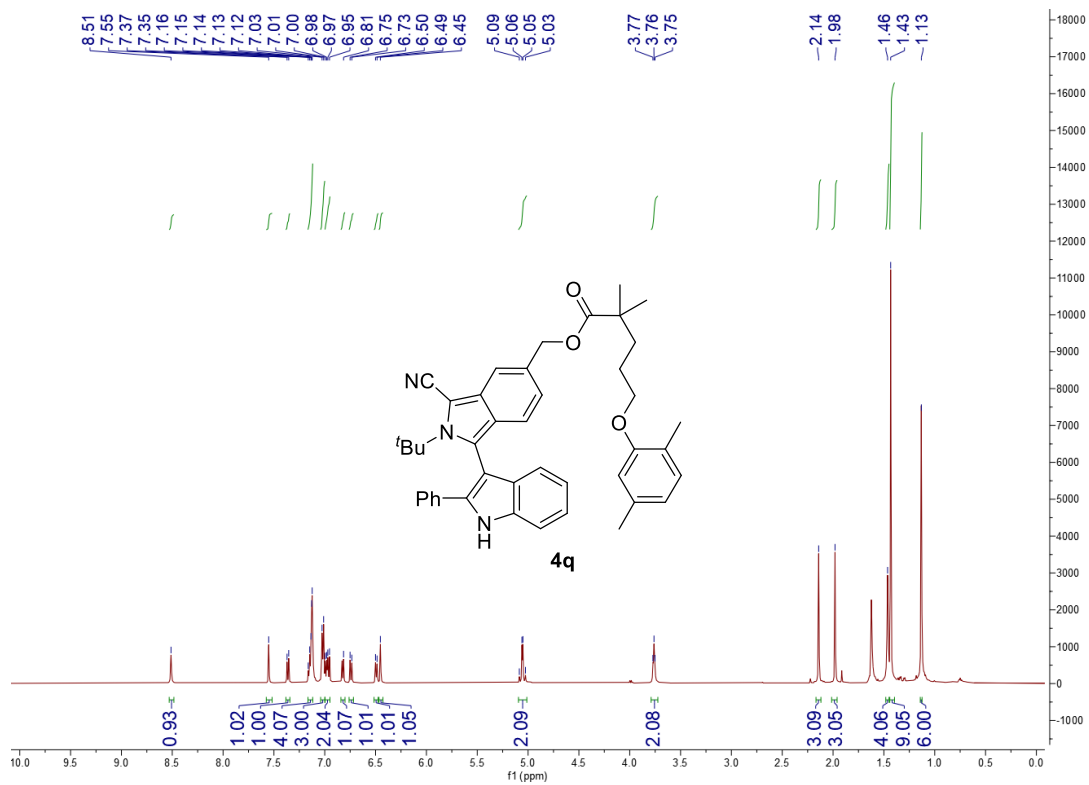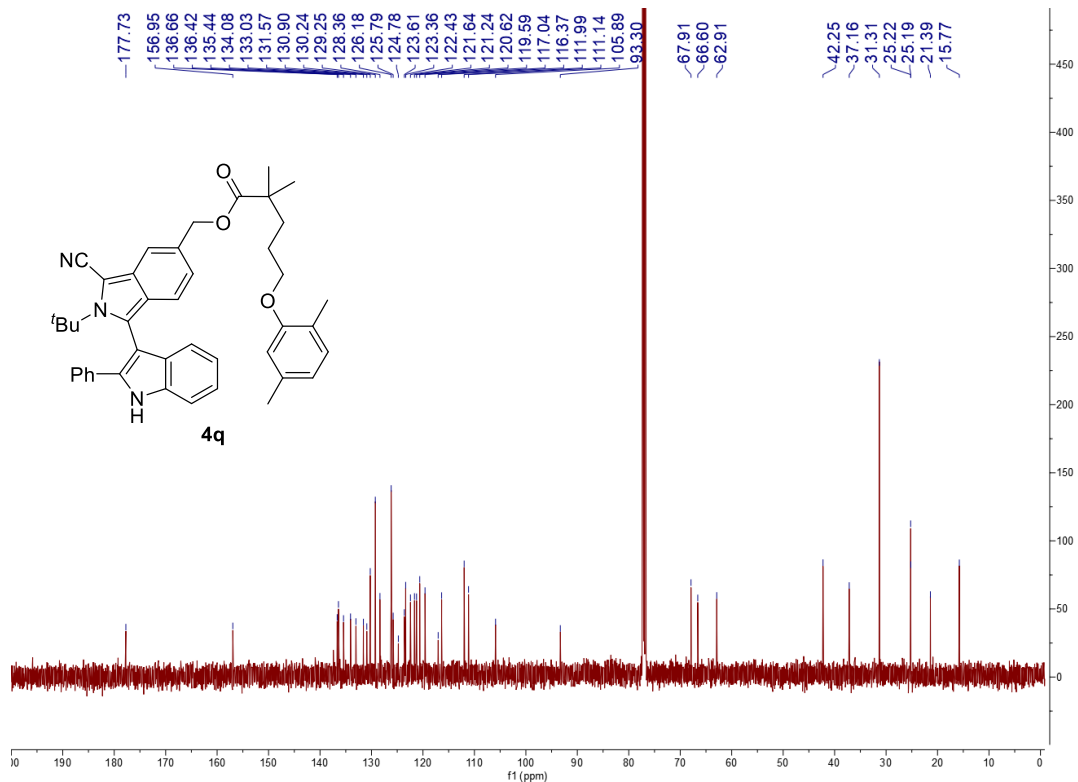

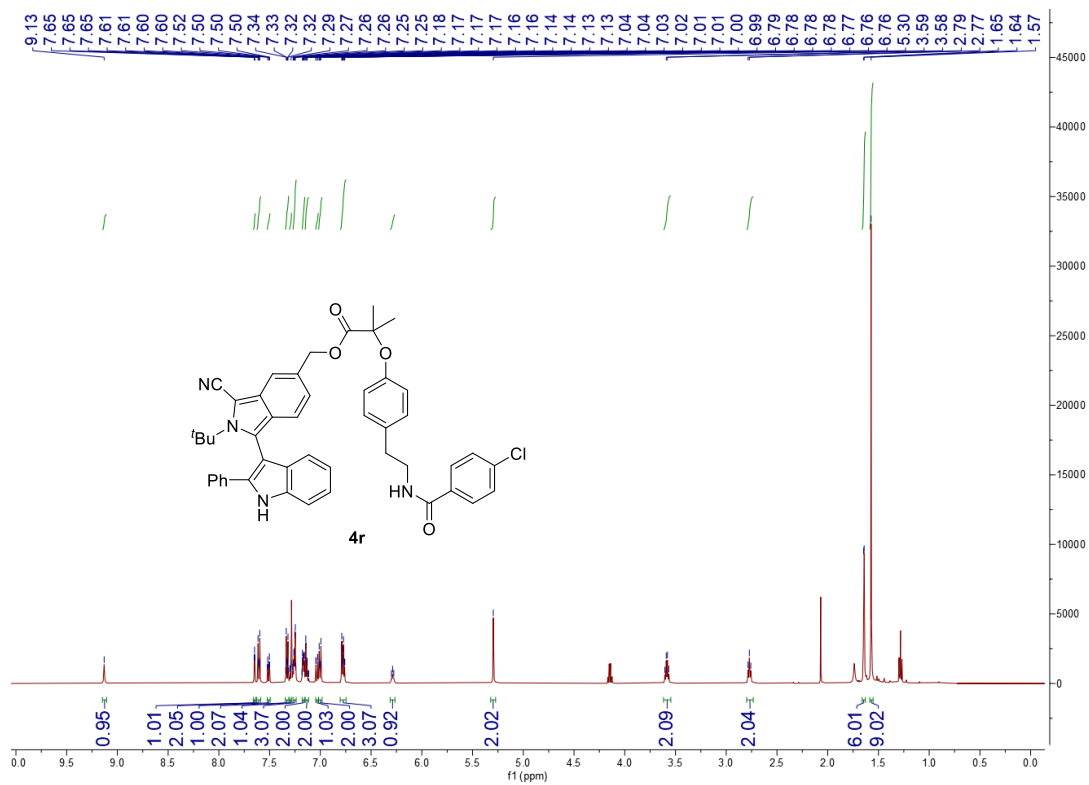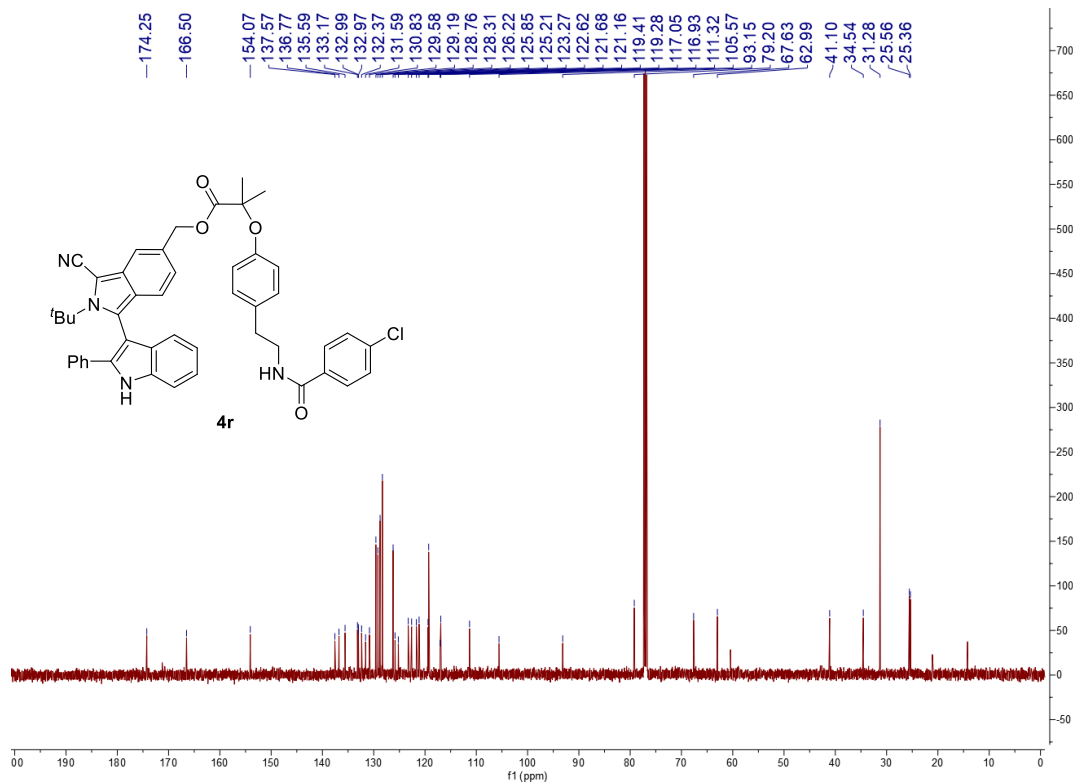

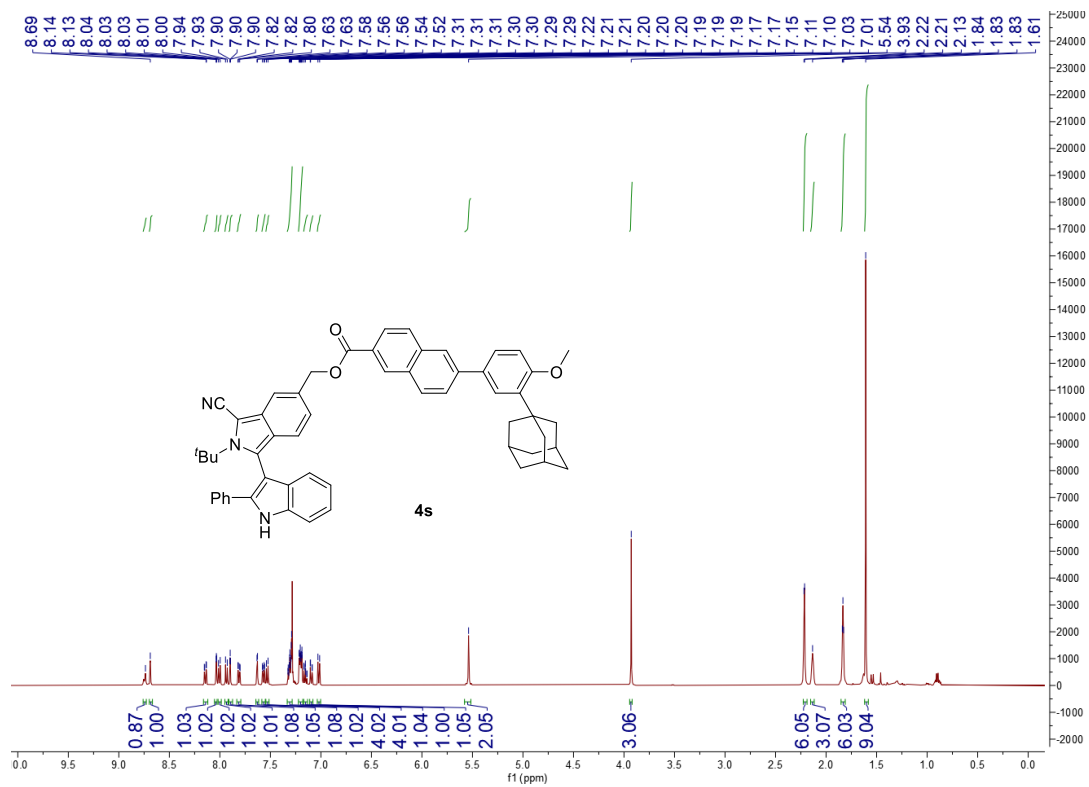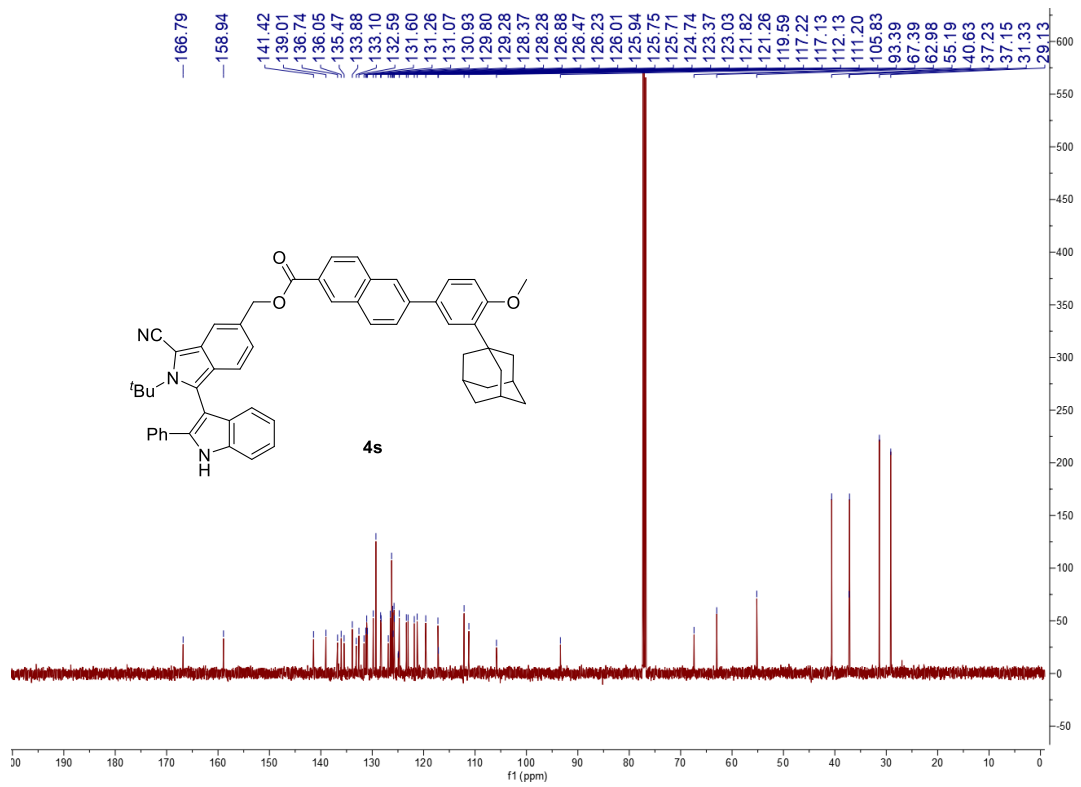

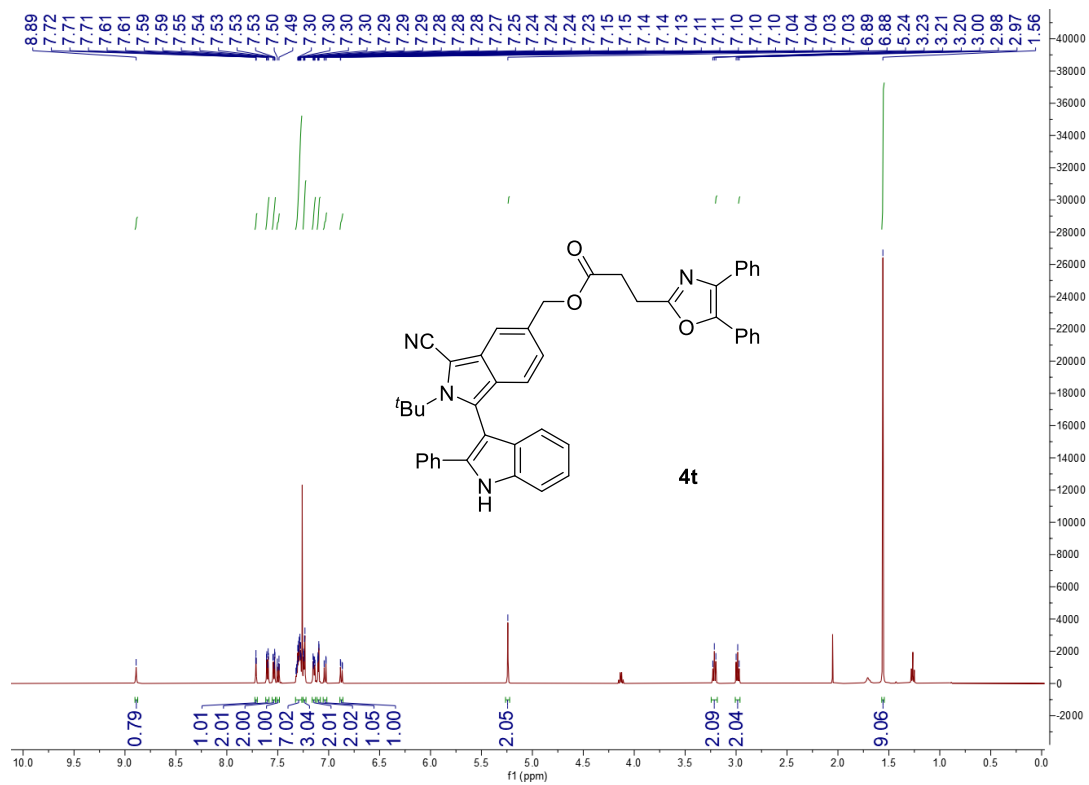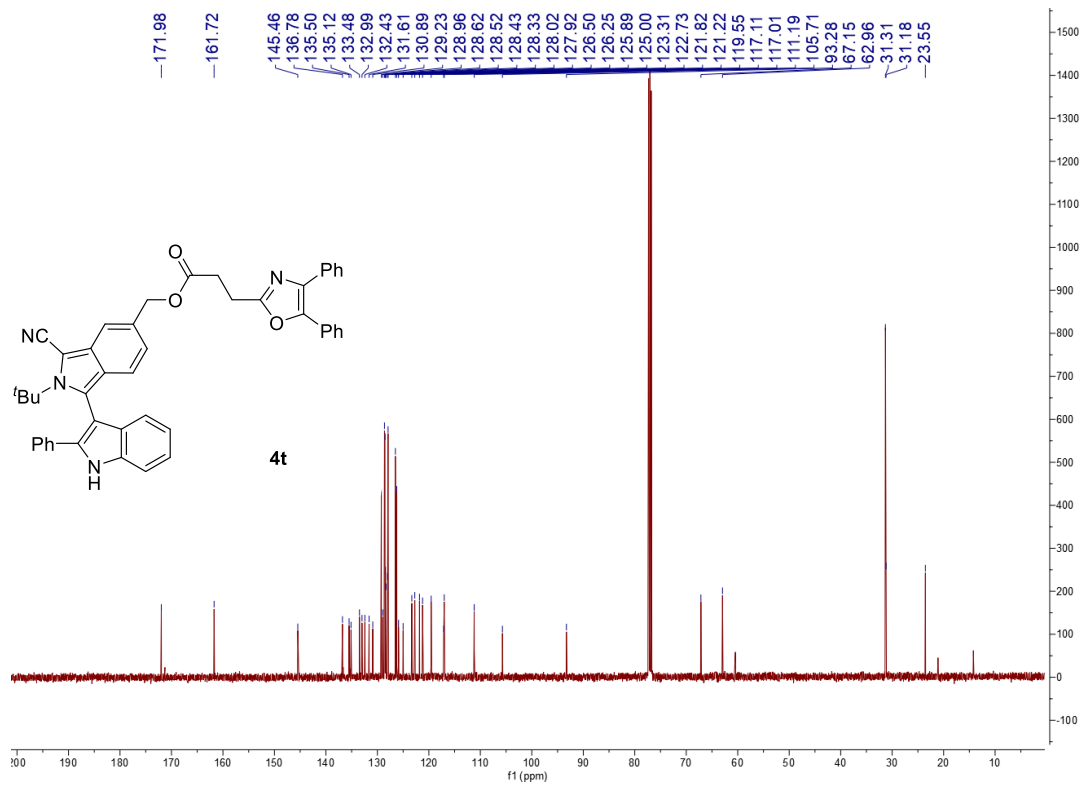

Supplement: d3cc02654j1.pdf [file d3cc02654j1.pdf]
